# Supplementary material for: Polyaromatic molecular peanuts
Source: PubMed Central journal article supplement (PMC5493752; doi:10.1038/ncomms15914), 2017-06-28
Supplement: ncomms15914-s1.pdf [file ncomms15914-s1.pdf]

Type of file: PDF

Title of file for HTML: Supplementary Information

Description: Supplementary Figures, Supplementary Table, Supplementary Methods, and Supplementary References.

Type of file: PDF

Title of file for HTML: Peer Review File

Description:

## Supplementary Figures

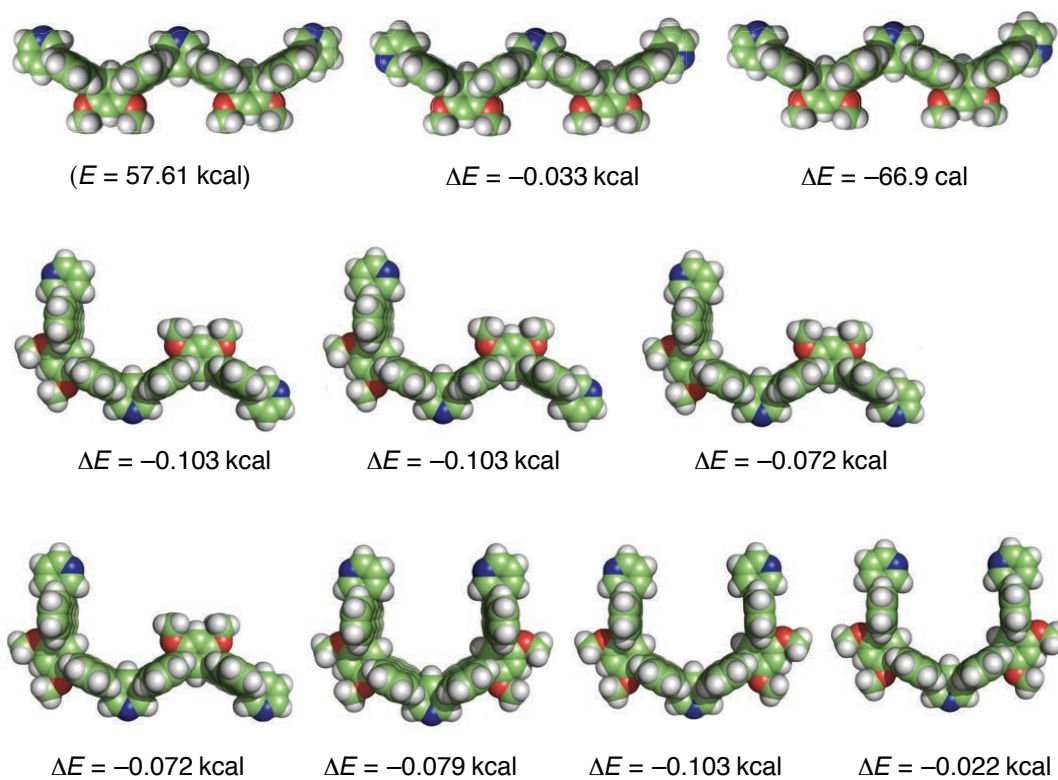

**Supplementary Figure 1** | Optimized structures and energies (based on the upper-left structure) of ten stereoisomers of ligand **1** (R = -OCH<sub>3</sub>) (PM6 calculations).



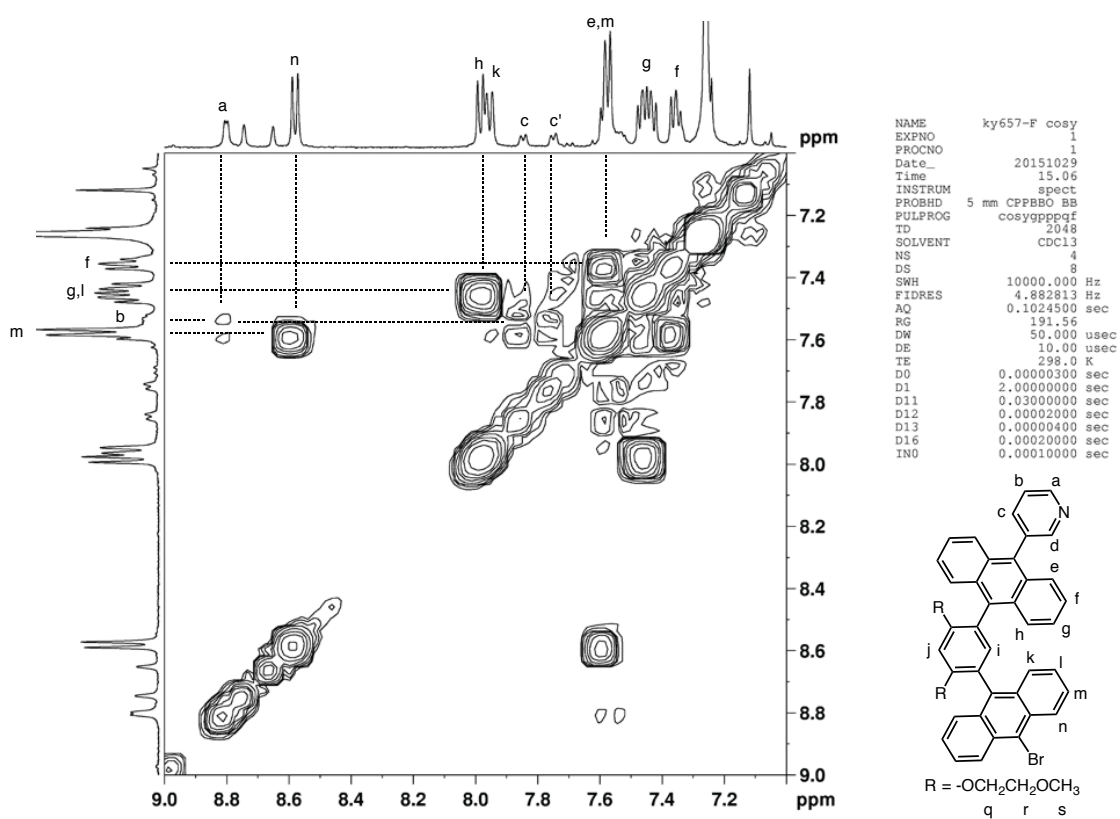

Supplementary Figure 4 | HH COSY spectrum (500 MHz, CDCl<sub>3</sub>, room temperature) of **6a**.



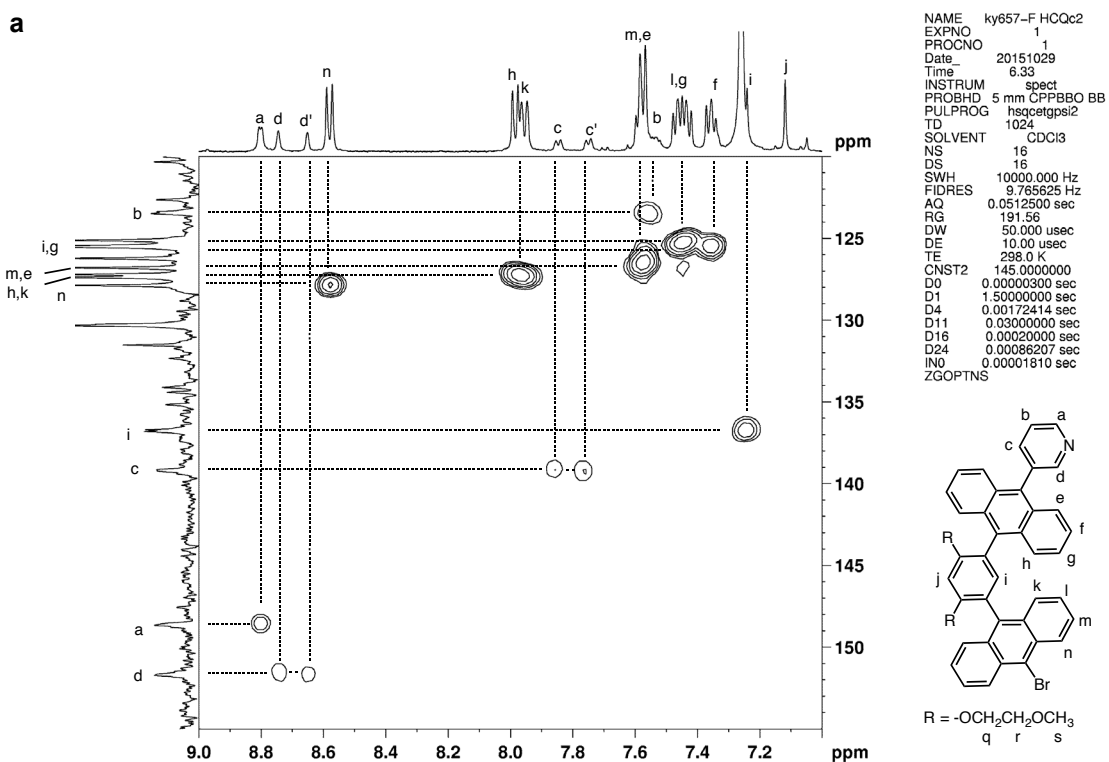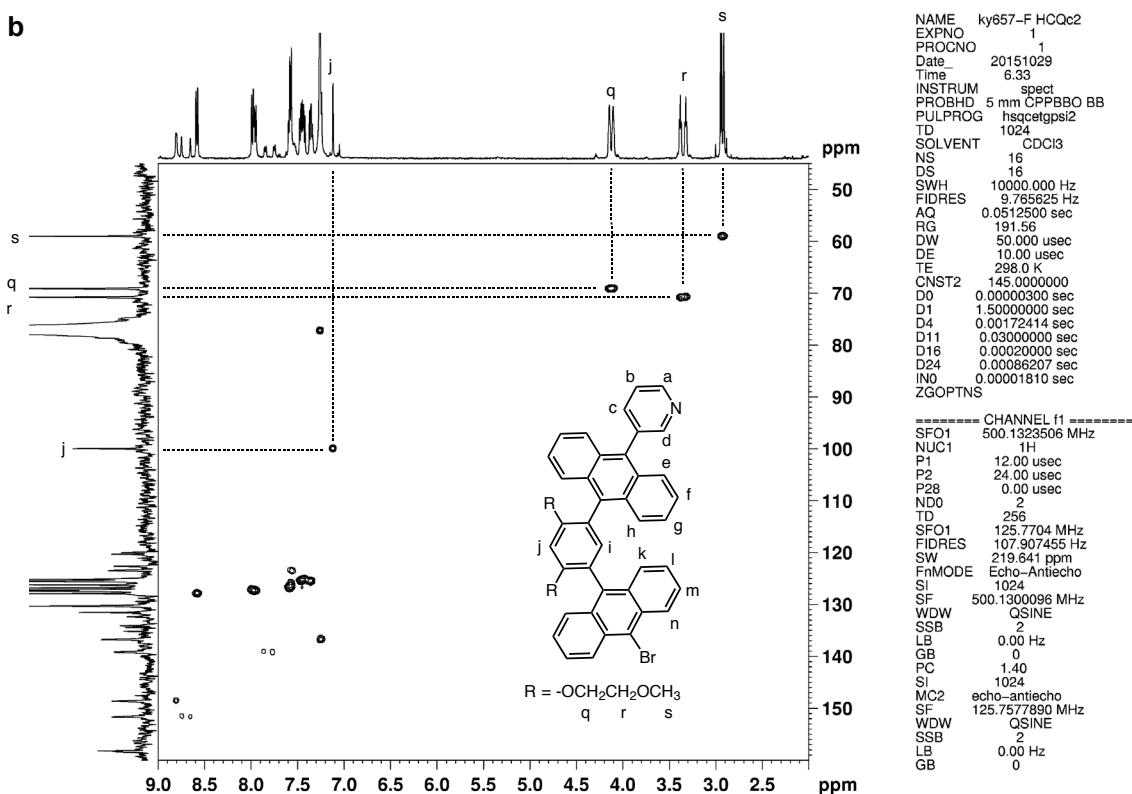

**Supplementary Figure 5** | HSQC spectra (500 MHz, CDCl<sub>3</sub>, room temperature) of **6a**. (a) The aromatic and (b) aliphatic regions.



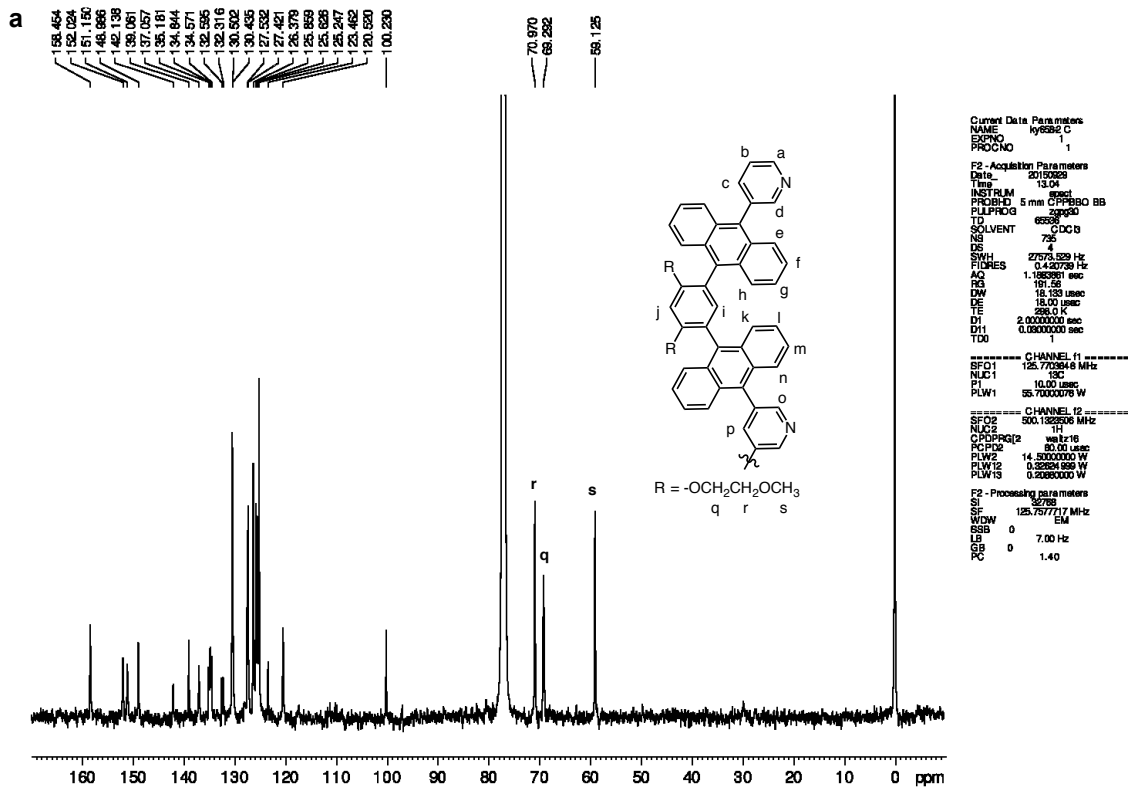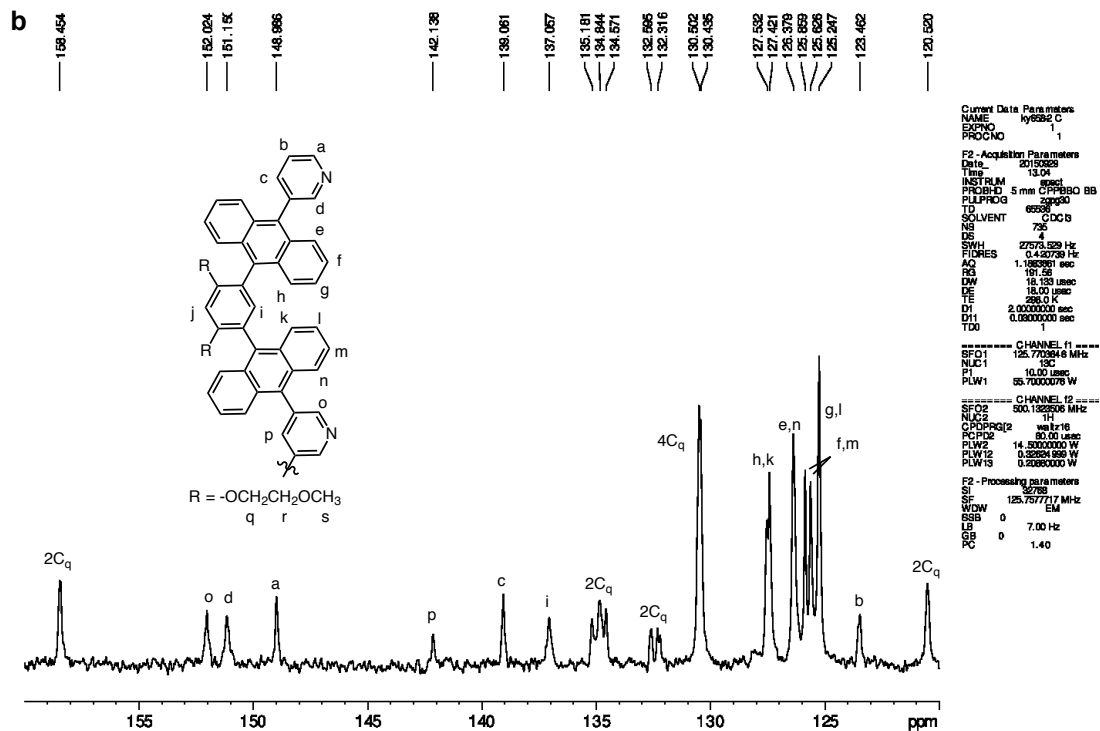

**Supplementary Figure 8 |**  $^{13}\text{C}$  NMR spectra (125 MHz,  $\text{CDCl}_3$ , room temperature) of **1a**. (a) The aromatic and aliphatic and (b) aromatic regions.

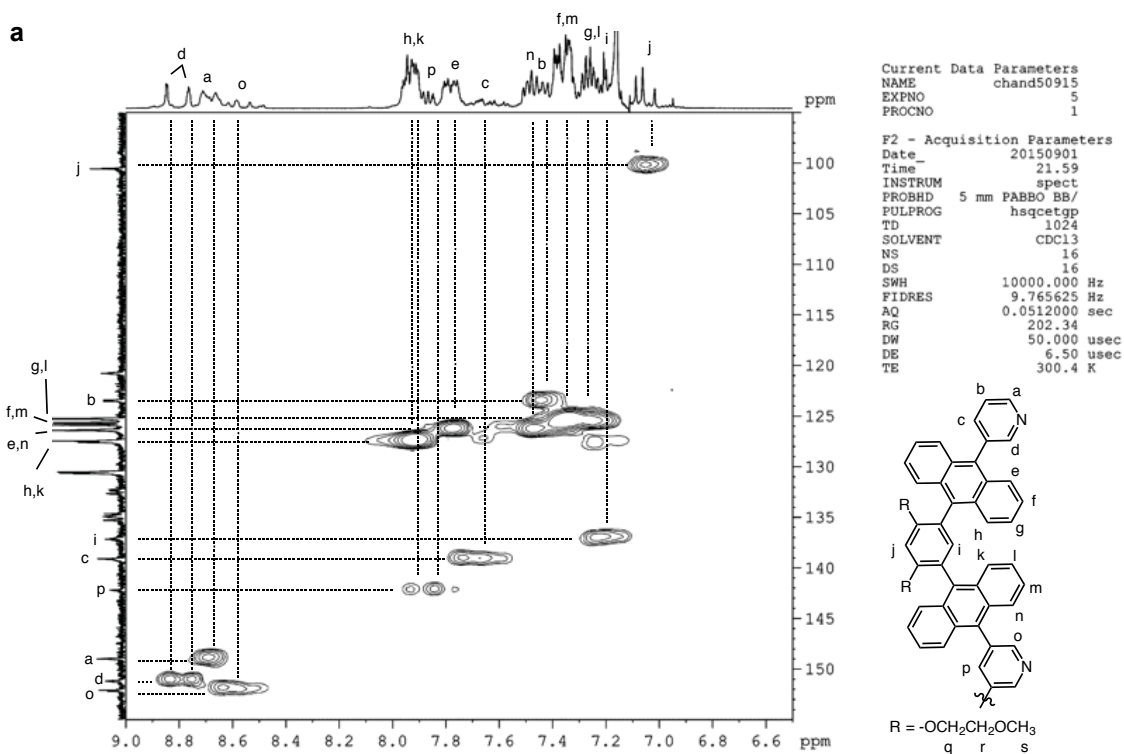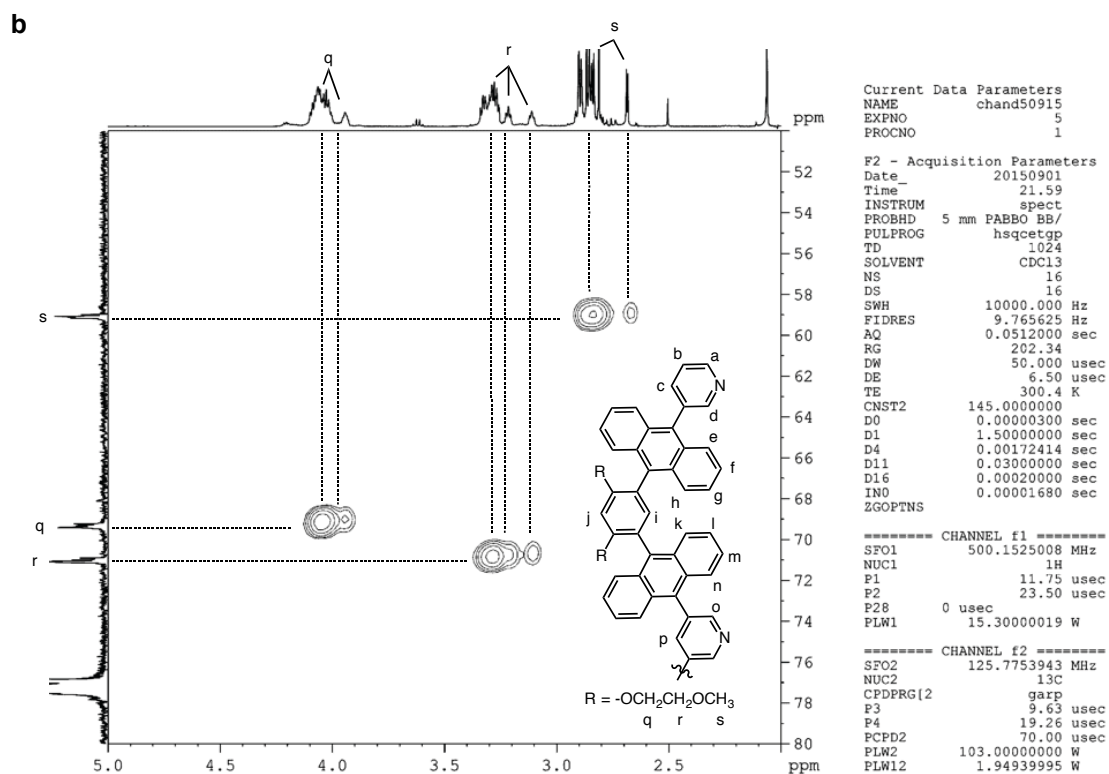

**Supplementary Figure 9** | HSQC spectra (500 MHz, CDCl<sub>3</sub>, room temperature) of **1a**. (a) The aromatic and (b) aliphatic regions.

**a**

ky685

Data: ky6580001.E9[c] 2 Oct 2015 16:12 Cal: akita-yoshizawa-ref 24 Sep 2015 0:54

Shimadzu Biotech Axima CFRplus 2.9.3.20110624: Mode Reflectron, Power: 100, P.Ext. @ 1385 (bin 92)

%Int. 42 mV[sum= 4153 mV] Profiles 1-100 Unsmoothed

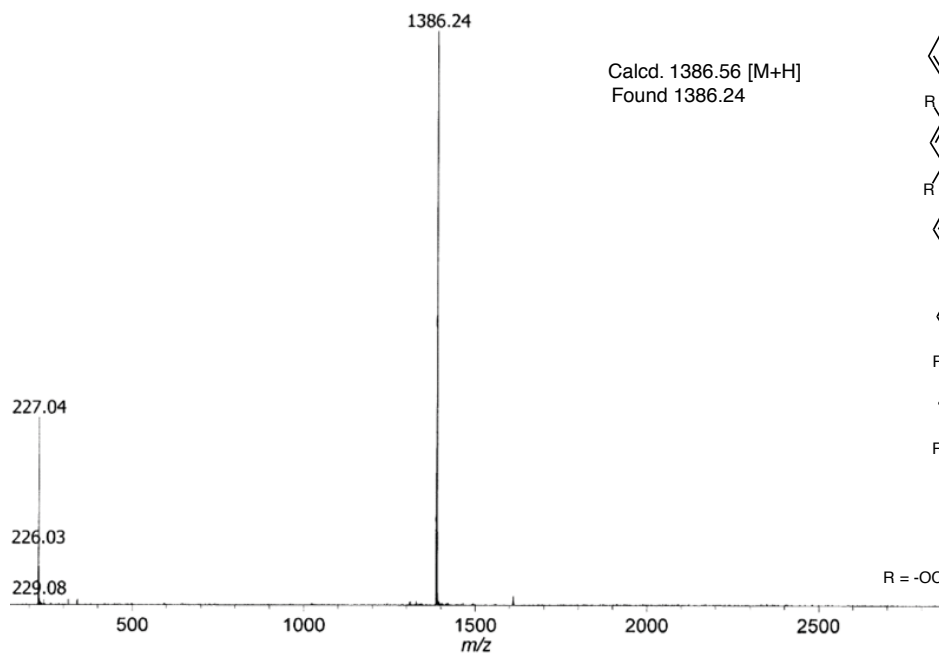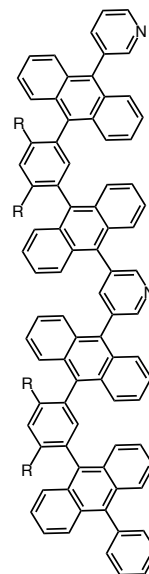

R = -OCH<sub>2</sub>CH<sub>2</sub>OCH<sub>3</sub>

**b**

### Generic Display Report

|               |                                                                      |                       |          |
|---------------|----------------------------------------------------------------------|-----------------------|----------|
| Analysis Info | Acquisition Date                                                     | 10/28/2015 7:22:04 PM |          |
| Analysis Name | D:\Data\akita\11yazaki\doubledecker HRMS\carib- Ligand gisanna OK3.d |                       |          |
| Method        | Pd_complex2.m                                                        | Operator              | BDAL@DE  |
| Sample Name   | 1                                                                    | Instrument            | micrOTOF |
| Comment       |                                                                      |                       |          |

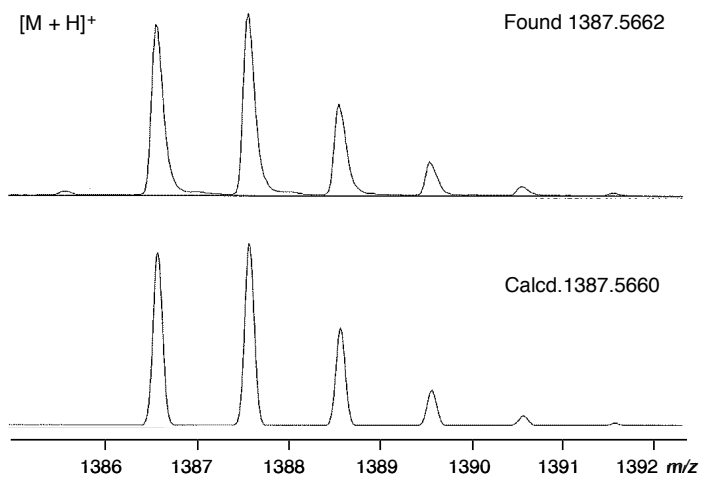

**Supplementary Figure 10 | (a) MALDI-TOF MS (dithranol) and (b) HR MS (ESI) spectra of 1a.**

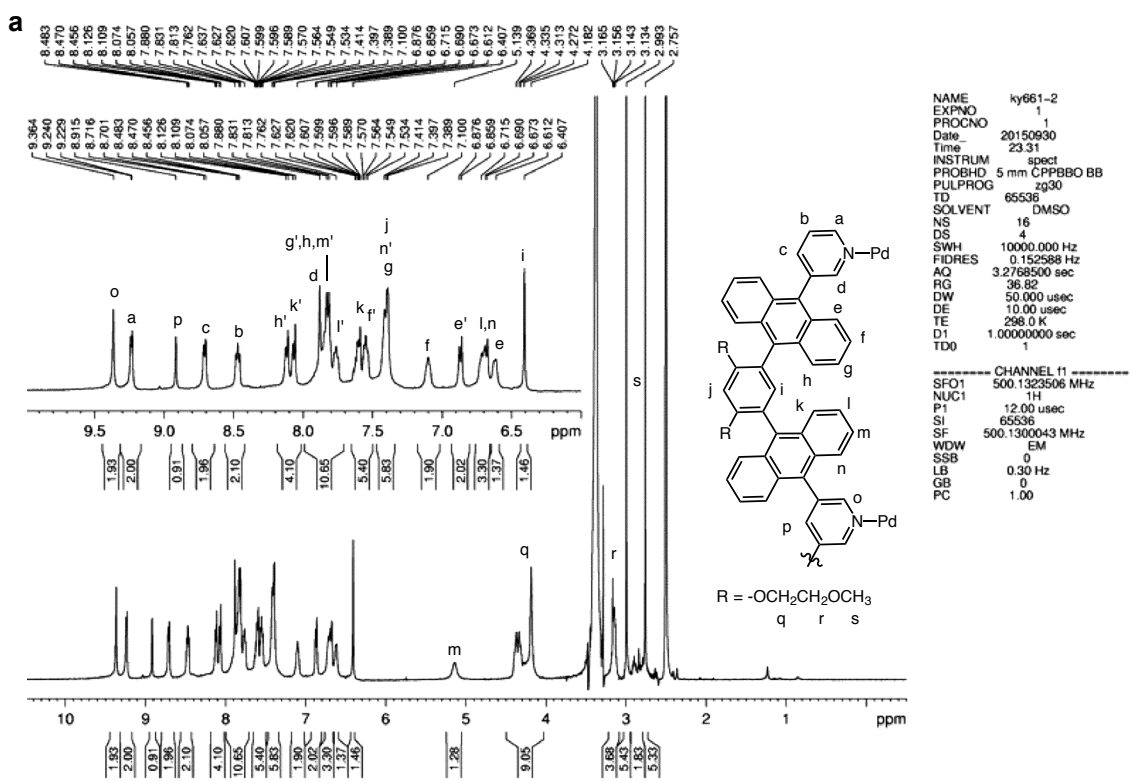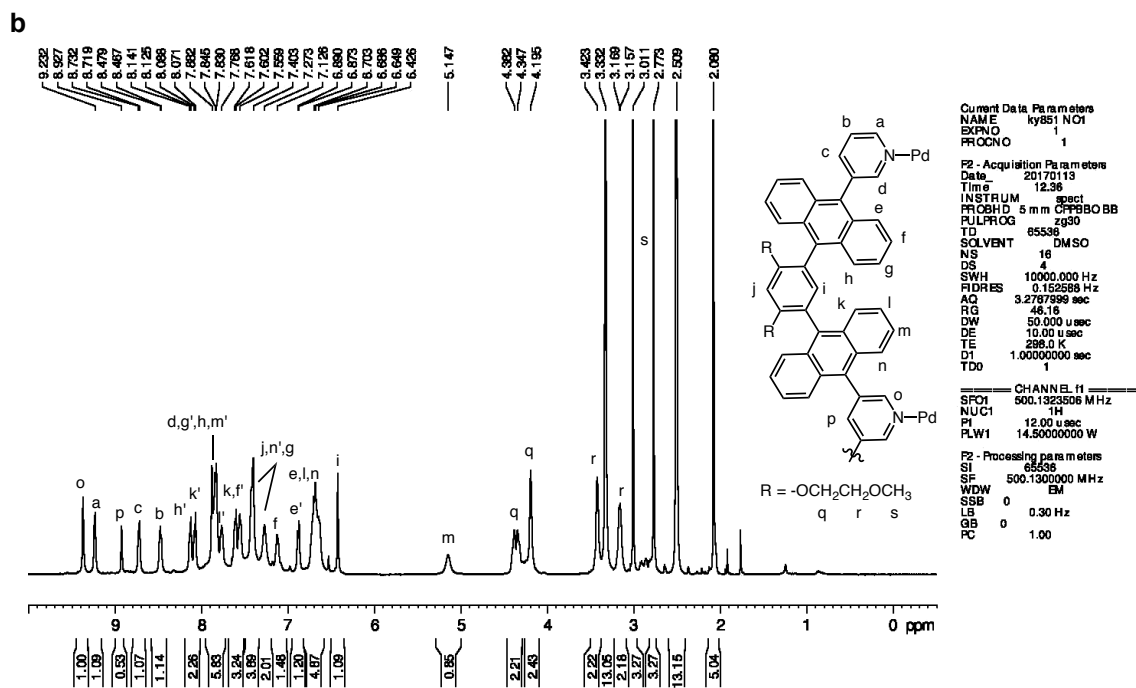

**Supplementary Figure 11** |  $^1\text{H}$  NMR spectra (500 MHz,  $\text{DMSO-}d_6$ , room temperature) of (a) **2a** and (b) **2a'**.

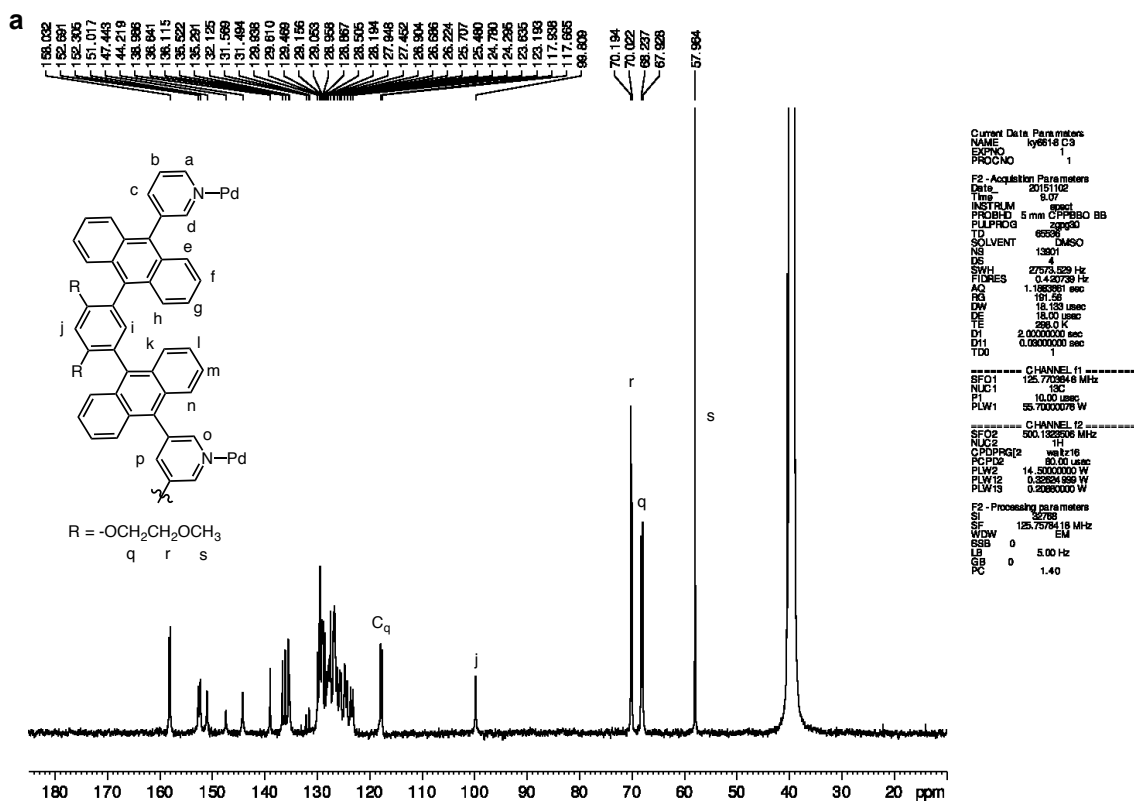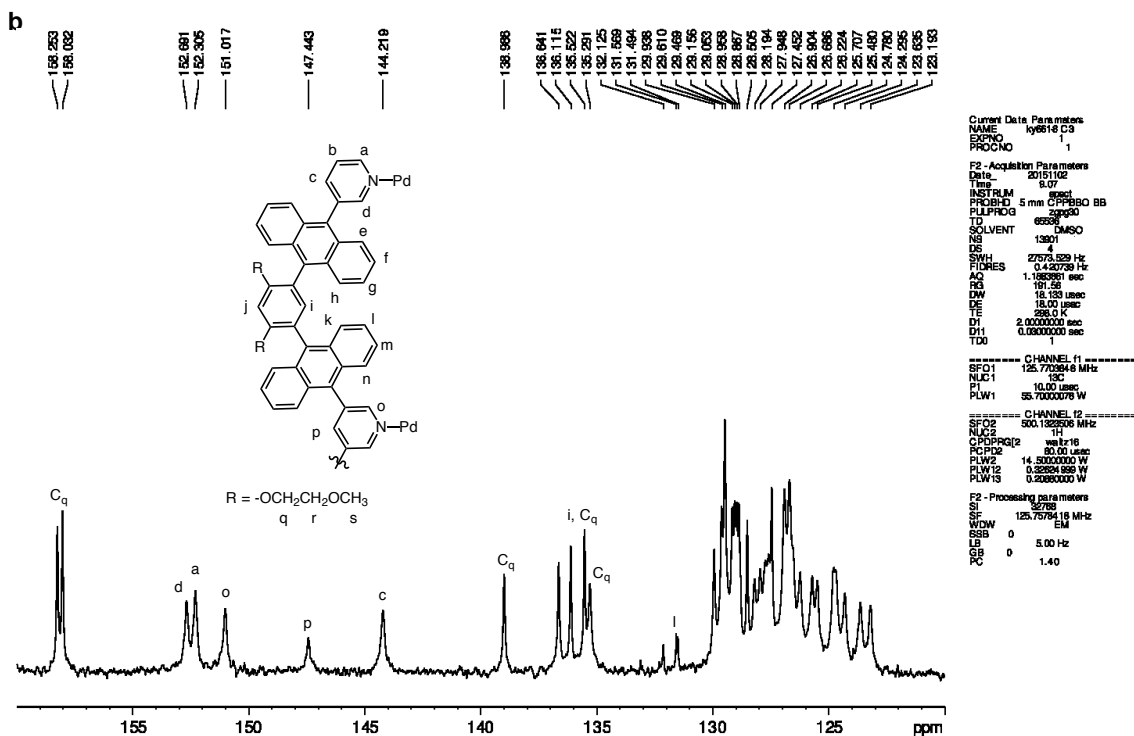

**Supplementary Figure 12** |  $^{13}C$  NMR spectra (125 MHz, DMSO- $d_6$ , room temperature) of **2a**.  
 (a) The aromatic and aliphatic and (b) aromatic regions.

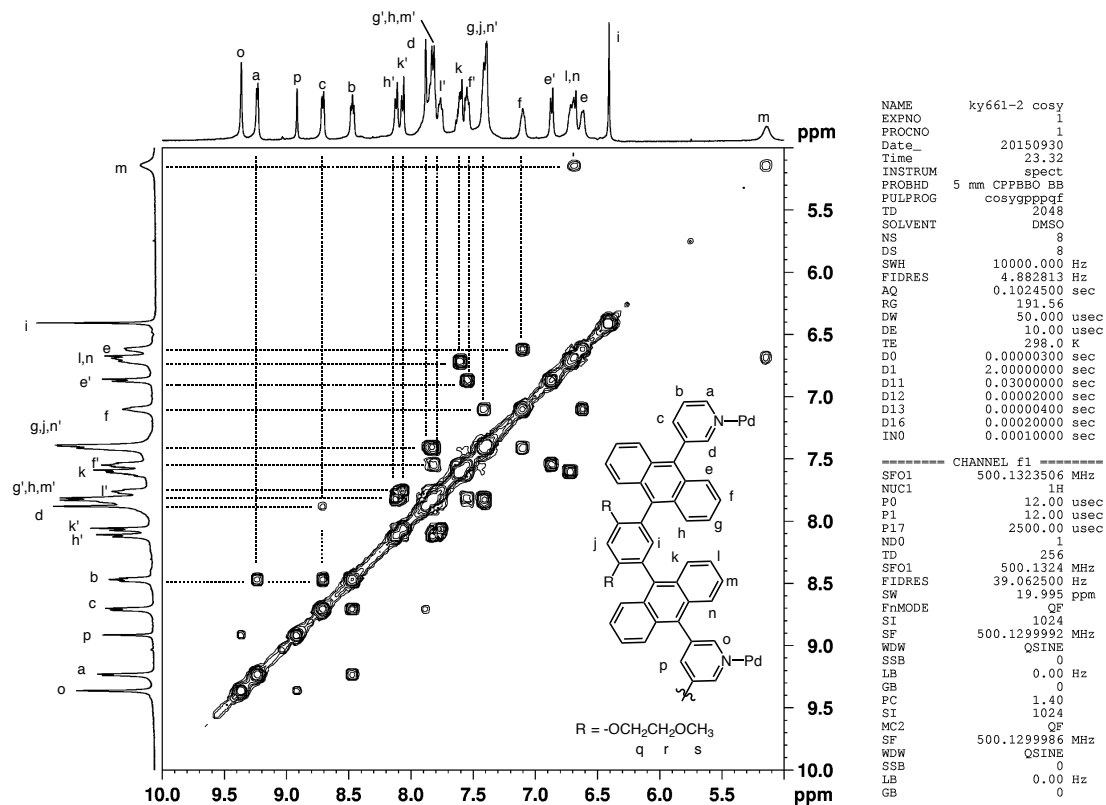

Supplementary Figure 13 | <sup>1</sup>H-<sup>1</sup>H COSY spectrum (500 MHz, DMSO-*d*<sub>6</sub>, room temperature) of 2a.

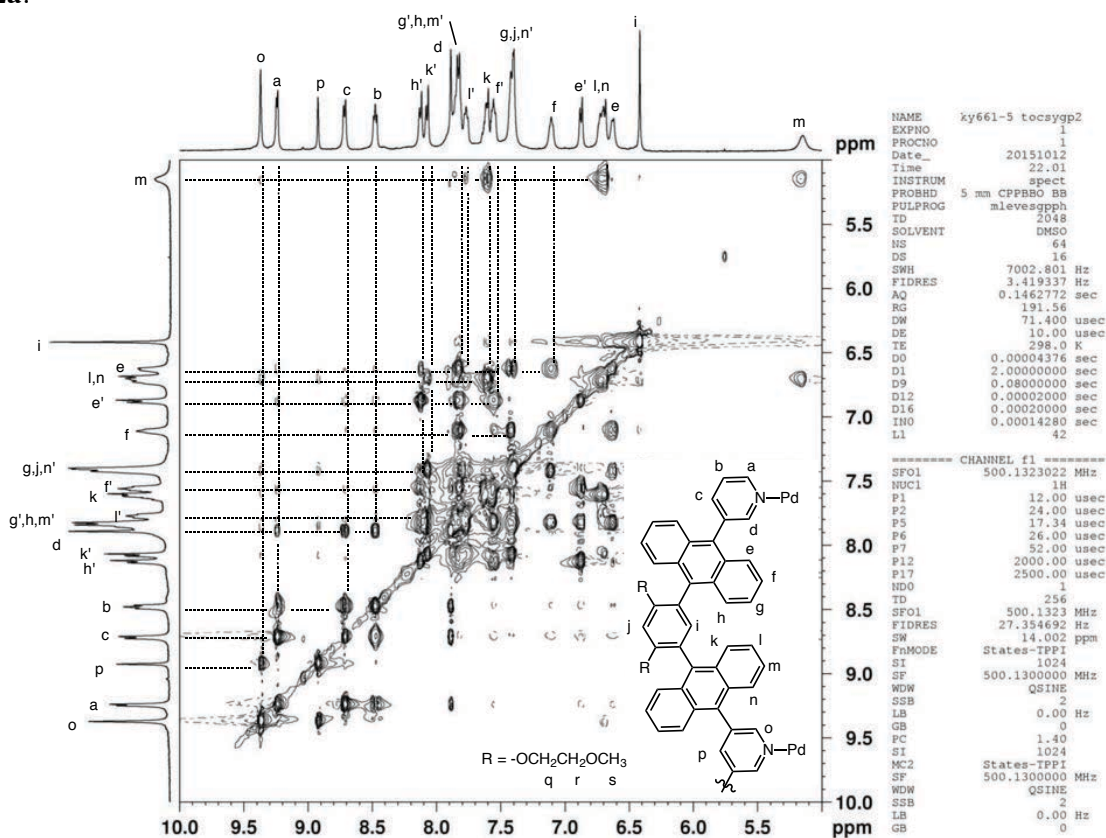

Supplementary Figure 14 | <sup>1</sup>H-<sup>1</sup>H TOCSY spectrum (500 MHz, DMSO-*d*<sub>6</sub>, room temperature) of 2a.



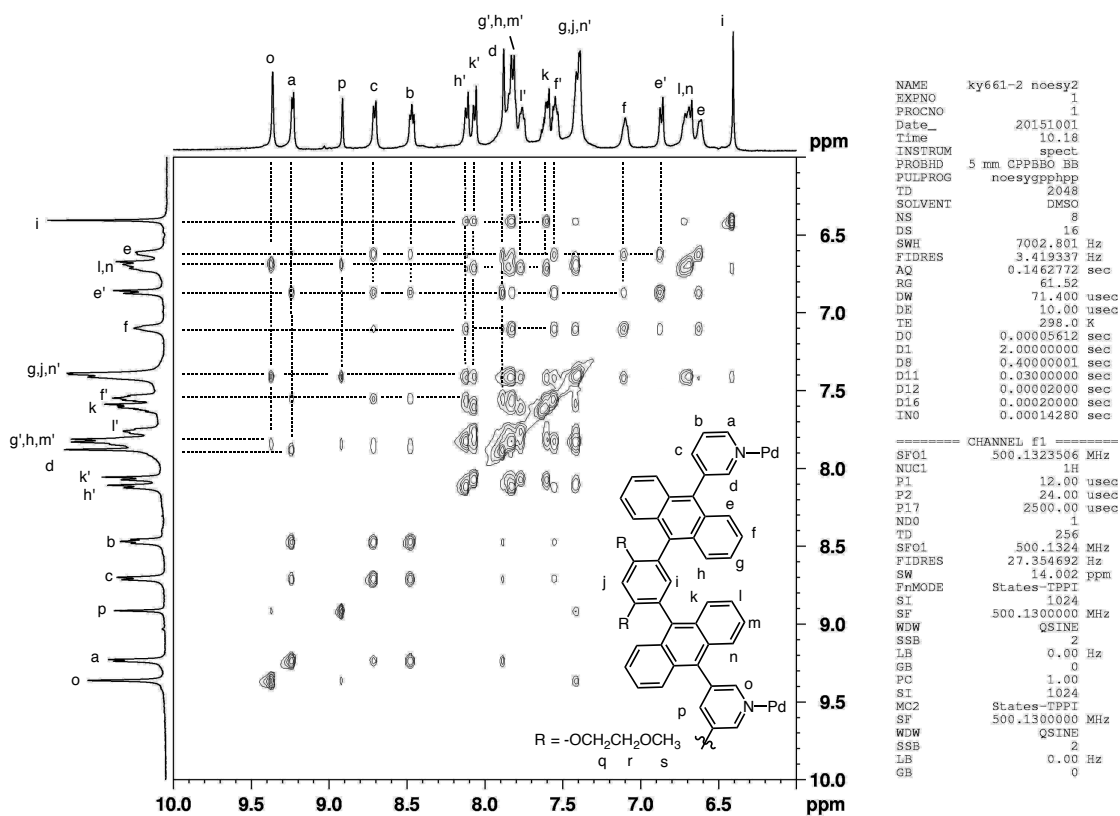

Supplementary Figure 15 | NOESY spectrum (500 MHz, DMSO-*d*<sub>6</sub>, room temperature) of **2a**.

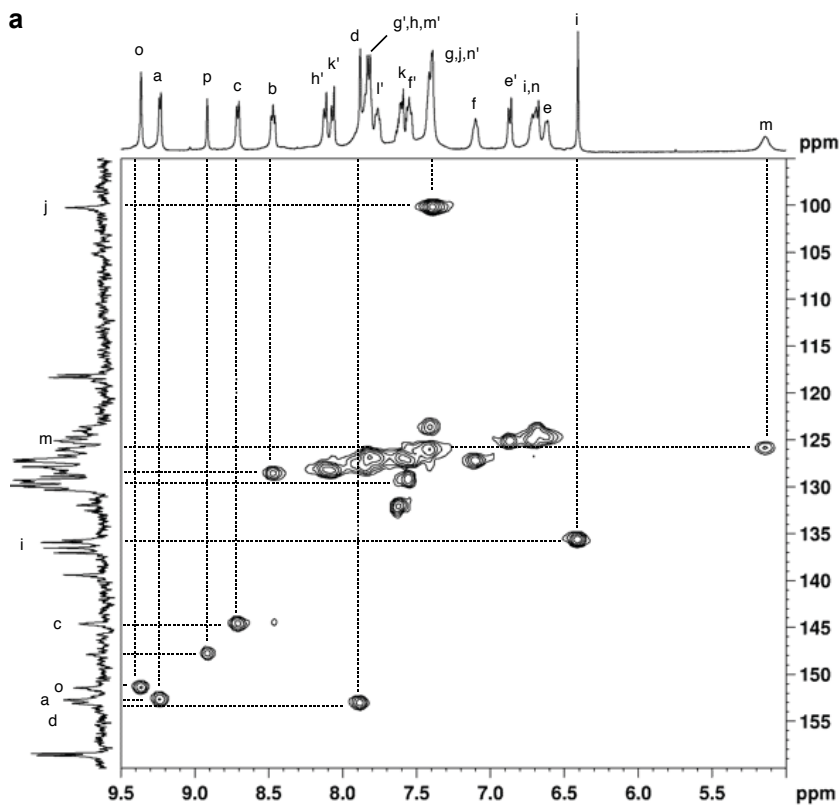

```

NAME ky661-2 HSQC
EXPNO 1
PROCNO 1
Date_ 20151001
Time 3.52
INSTRUM spect
PROBHD 5 mm CPPBBO BB
PULPROG hsqcetgpsi2
TD 1024
SOLVENT DMSO
NS 16
DS 16
SWH 10000.000 Hz
FIDRES 9.765625 Hz
AQ 0.0512500 sec
RG 191.56
DW 50.000 usec
DE 10.00 usec
TE 298.0 K
CNST2 145.0000000
D0 0.00000300 sec
D1 1.50000000 sec
D4 0.00172414 sec
D11 0.03000000 sec
D16 0.00020000 sec
D24 0.00086207 sec
INO 0.00001810 sec

```

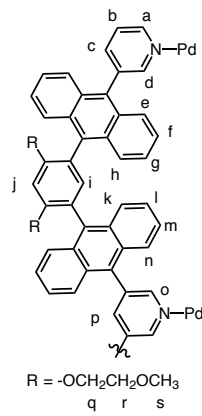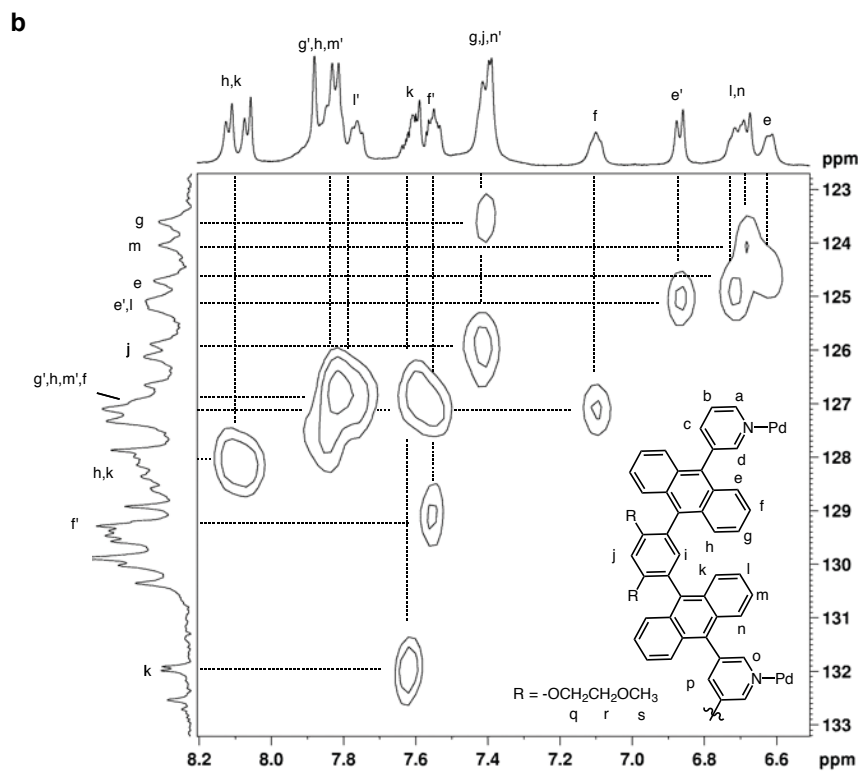

```

NAME ky661-2 HSQC
EXPNO 1
PROCNO 1
Date_ 20151001
Time 3.52
INSTRUM spect
PROBHD 5 mm CPPBBO BB
PULPROG hsqcetgpsi2
TD 1024
SOLVENT DMSO
NS 16
DS 16
SWH 10000.000 Hz
FIDRES 9.765625 Hz
AQ 0.0512500 sec
RG 191.56
DW 50.000 usec
DE 10.00 usec
TE 298.0 K
CNST2 145.0000000
D0 0.00000300 sec
D1 1.50000000 sec
D4 0.00172414 sec
D11 0.03000000 sec
D16 0.00020000 sec
D24 0.00086207 sec
INO 0.00001810 sec
ZGPTNS
----- CHANNEL f1 -----
SFO1 500.1323506 MHz
NUC1 1H
P1 12.00 usec
P2 24.00 usec
P2B 0.00 usec
ND0 2
TD 256
SFO1 125.7704 MHz
FIDRES 107.907455 Hz
SW 219.641 ppm
FmMODE Echo-Antiecho
SI 1024
SF 500.1300000 MHz
WDW QSINE
SSB 2
LB 0.00 Hz
GB 0
PC 1.40
SI 1024
MC2 echo-antiecho
SF 125.7577995 MHz
WDW QSINE
SSB 2
LB 0.00 Hz
GB 0

```

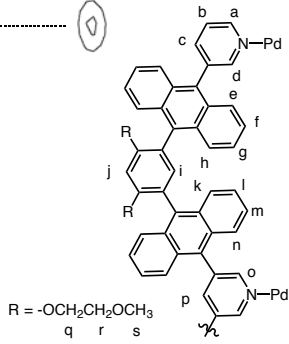

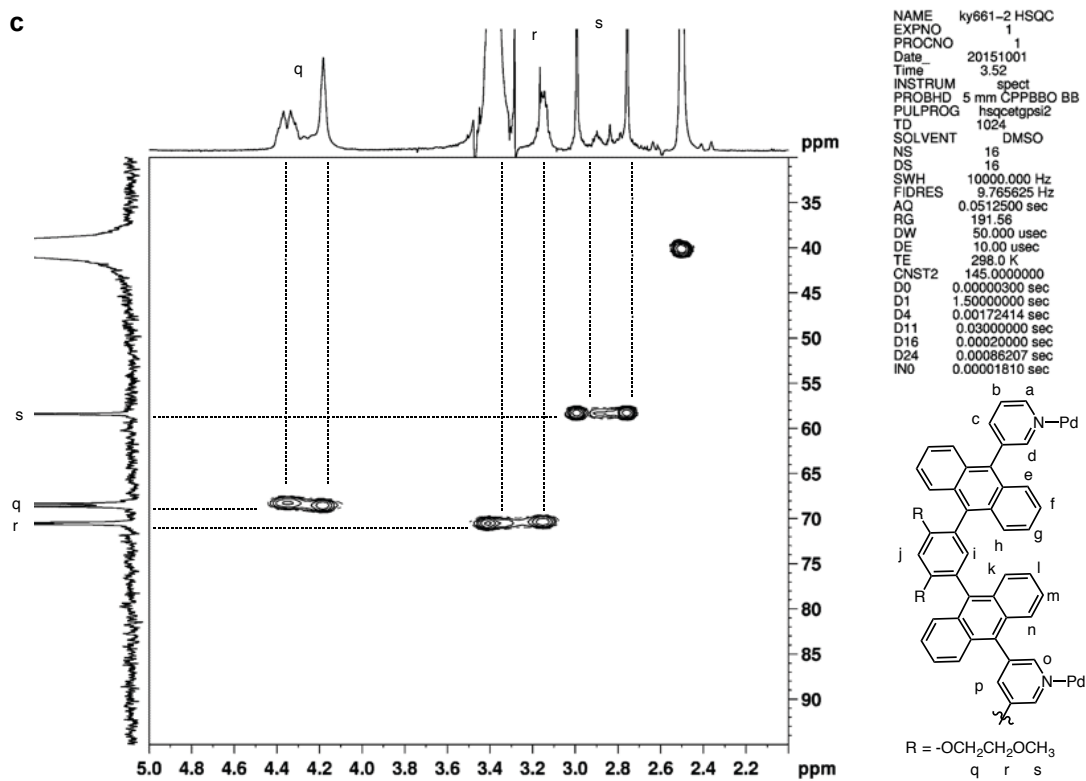

**Supplementary Figure 16** | HSQC spectra (500 MHz, DMSO-*d*<sub>6</sub>, room temperature) of **2a**. (a,b) The aromatic and (c) aliphatic regions.

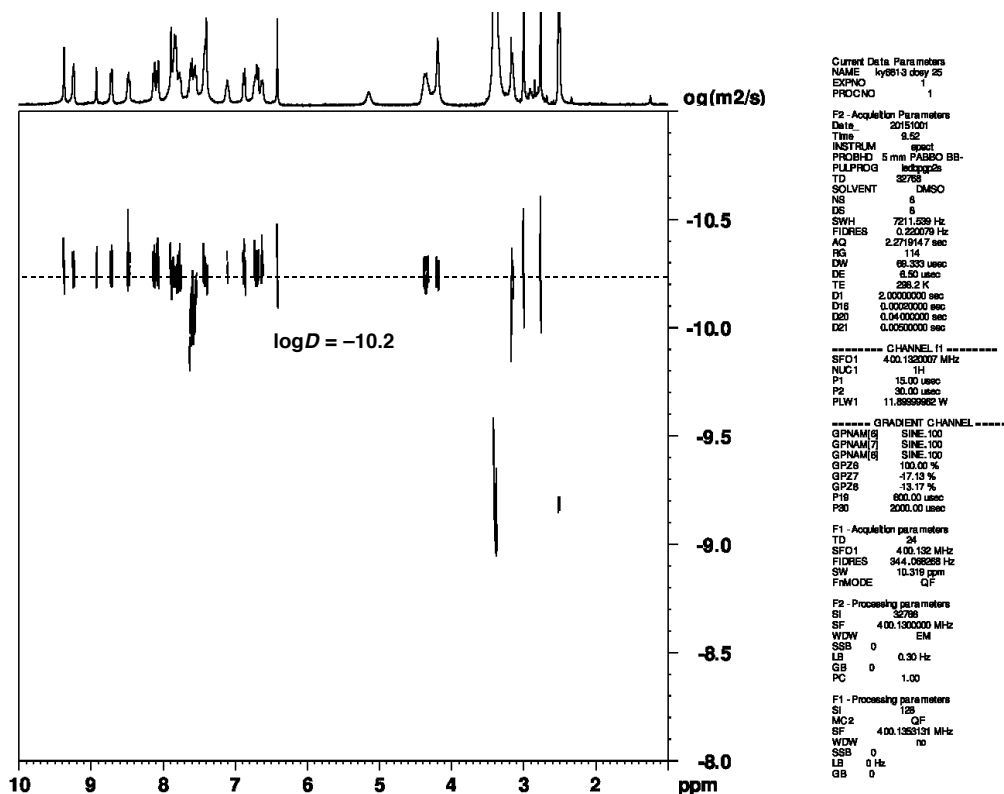

Supplementary Figure 17 | DOSY NMR (500 MHz, DMSO- $d_6$ , 298 K) of **2a**.

### Generic Display Report

|                                                           |                                       |
|-----------------------------------------------------------|---------------------------------------|
| Analysis Info                                             | Acquisition Date 12/5/2016 2:57:07 PM |
| Analysis Name D:\Data\akita\11yazaki\ky844 HRMS\NO4-NO3.d | Operator BDAL@DE                      |
| Method Pd_complex2.m                                      | Instrument micrOTOF                   |
| Sample Name NO1 NO2                                       |                                       |
| Comment                                                   |                                       |

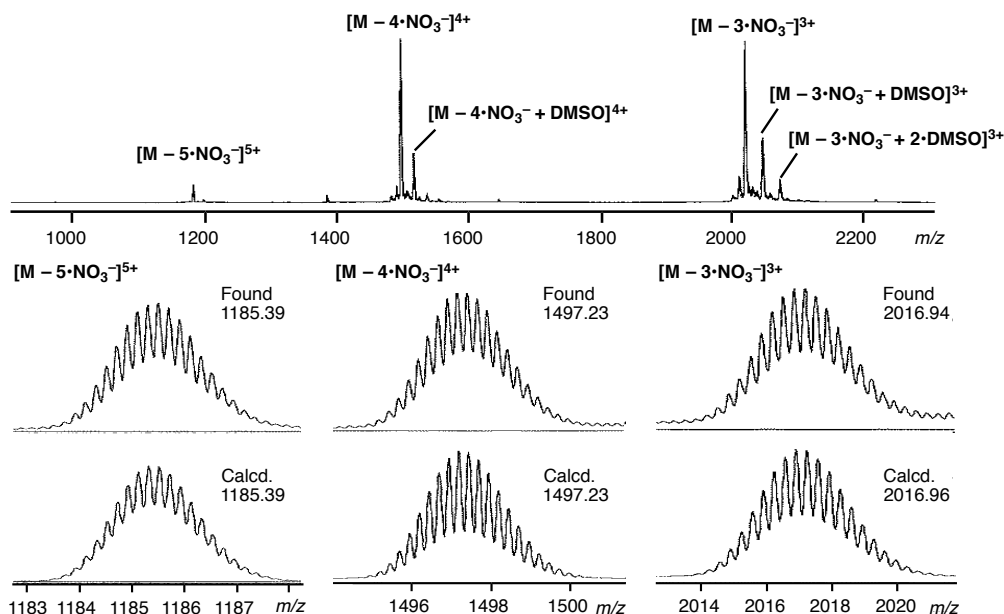

Supplementary Figure 18 | ESI-TOF MS spectrum ( $\text{CH}_3\text{OH}$ ) of **2a**.

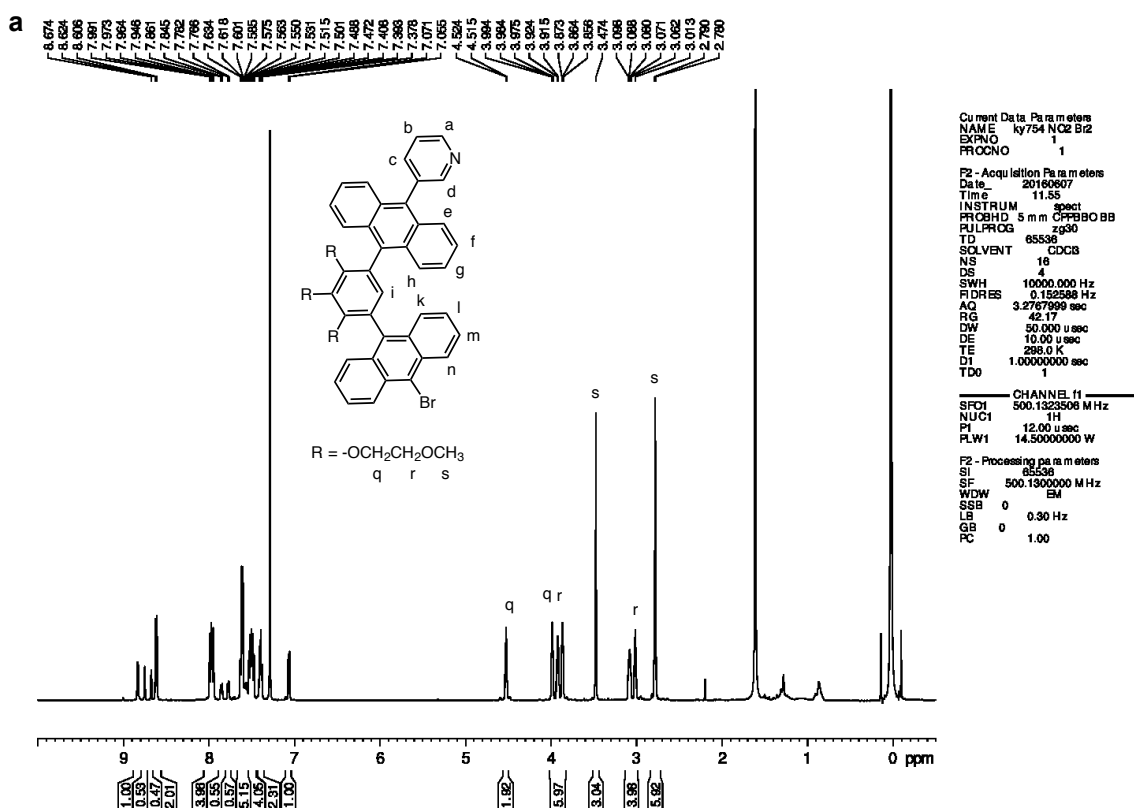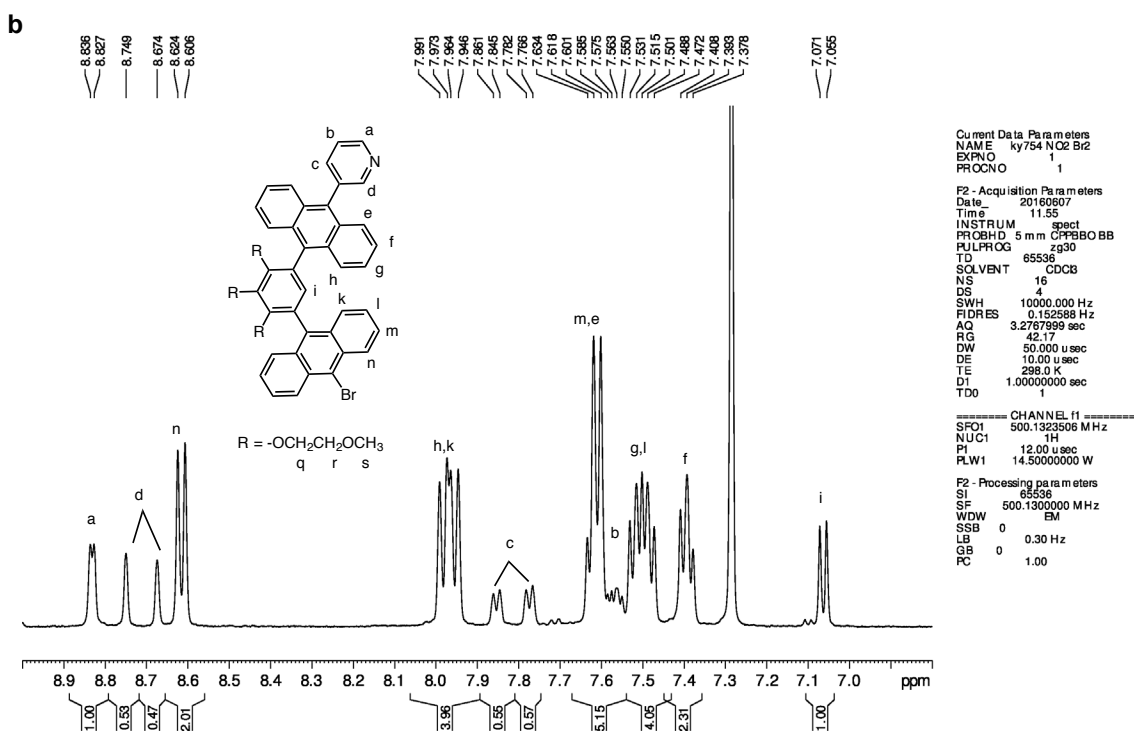

**Supplementary Figure 19** <sup>1</sup>H NMR spectra (500 MHz, CDCl<sub>3</sub>, room temperature) of **6b**. (a) The aromatic and aliphatic and (b) aromatic regions.

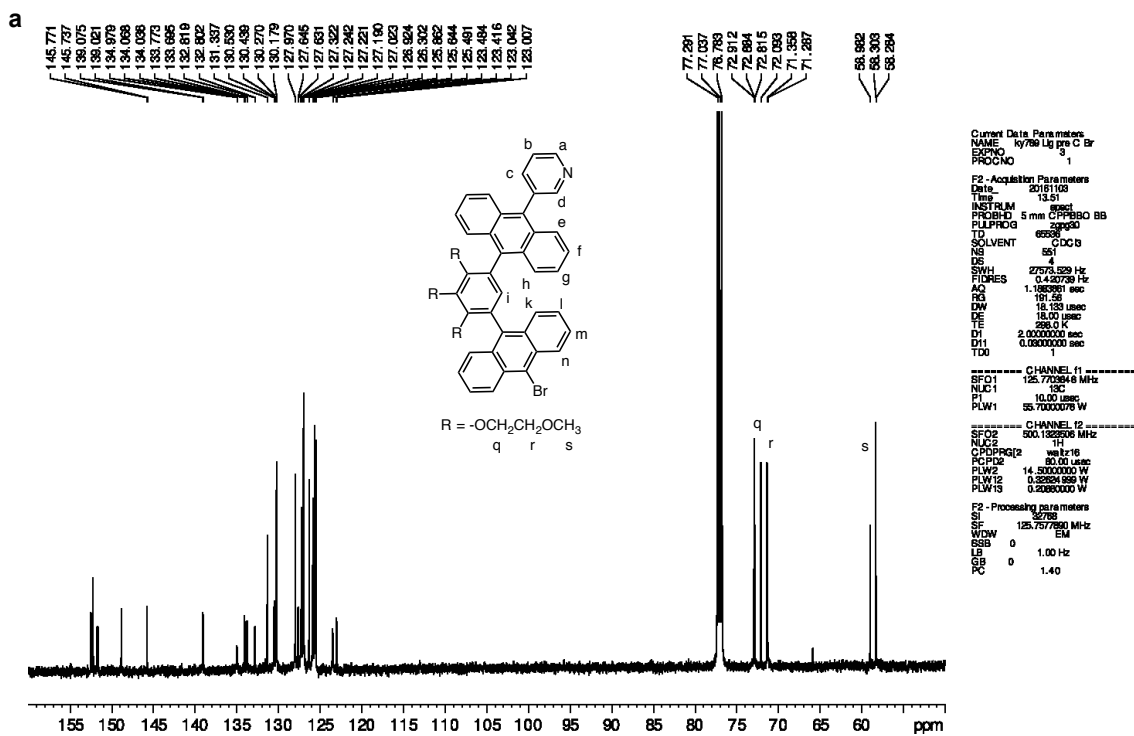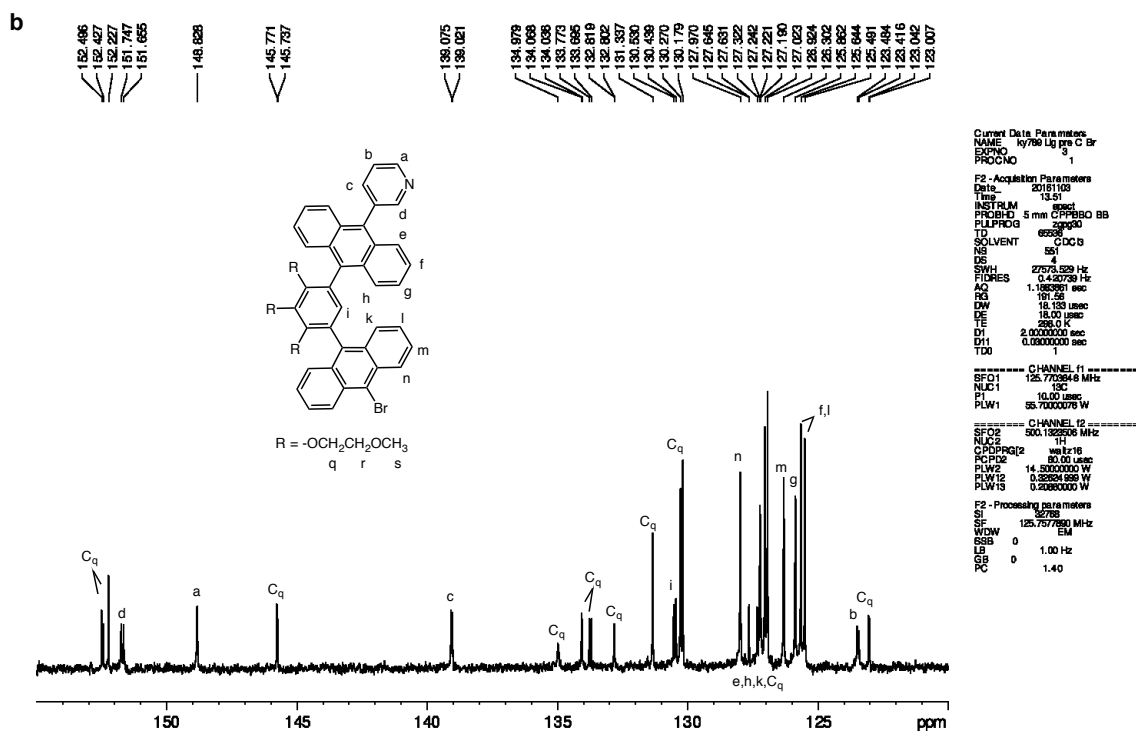

**Supplementary Figure 20** |  $^{13}\text{C}$  NMR spectra (125 MHz,  $\text{CDCl}_3$ , room temperature) of **6b**. (a) The aromatic and aliphatic and (b) aromatic regions.

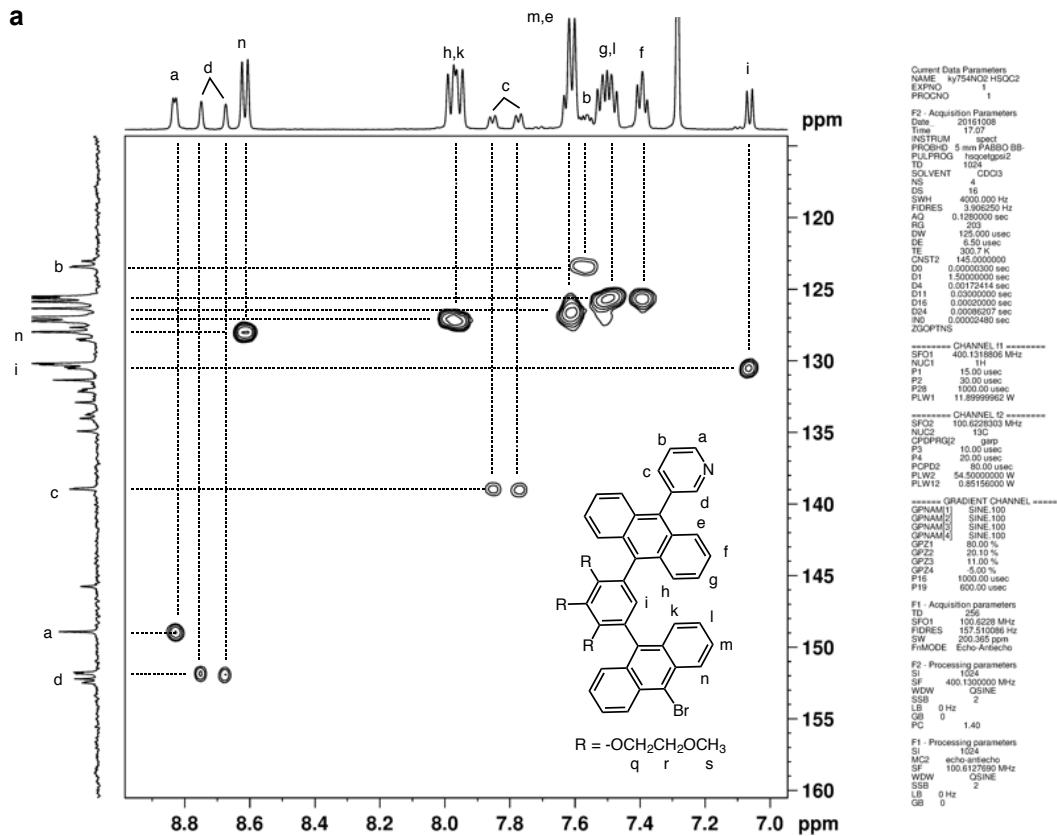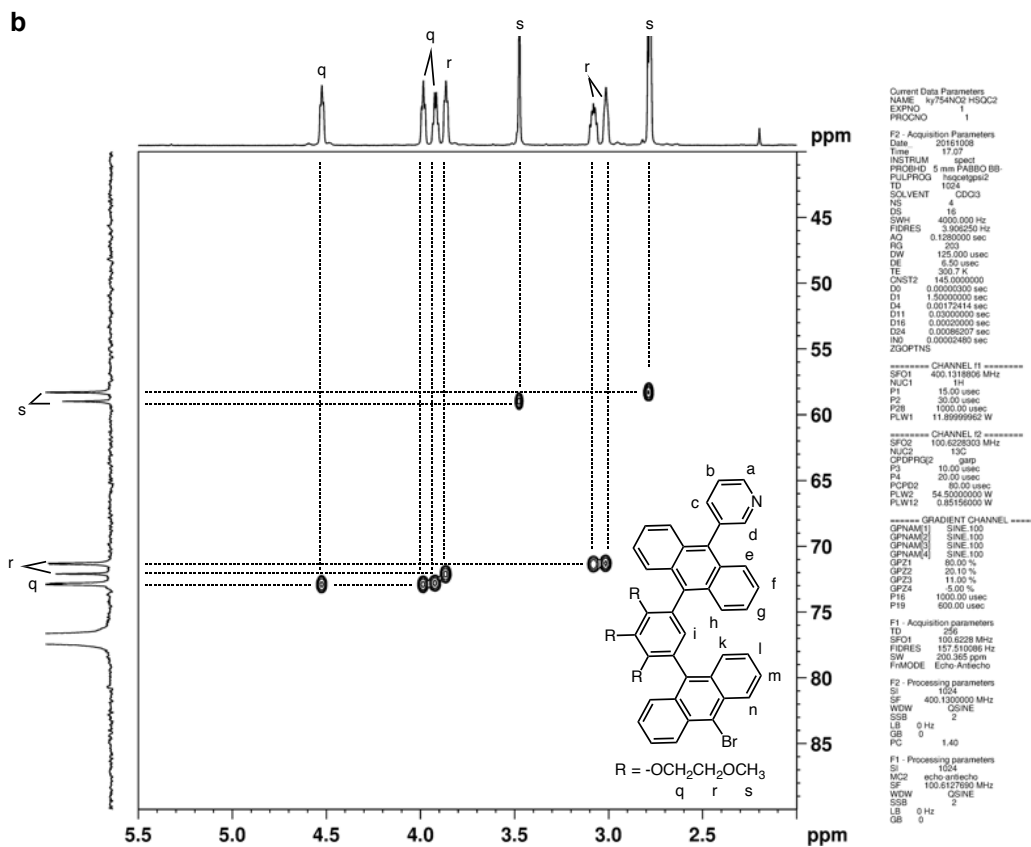

**Supplementary Figure 21** | HSQC spectra (500 MHz, CDCl<sub>3</sub>, room temperature) of **6b**. (a) The aromatic and (b) aliphatic regions.

**a**

D:\Data\akita\_yoshizawa\_lab\11yazaki\ky NO1\ky NO1\0\_B13\1\1SRef

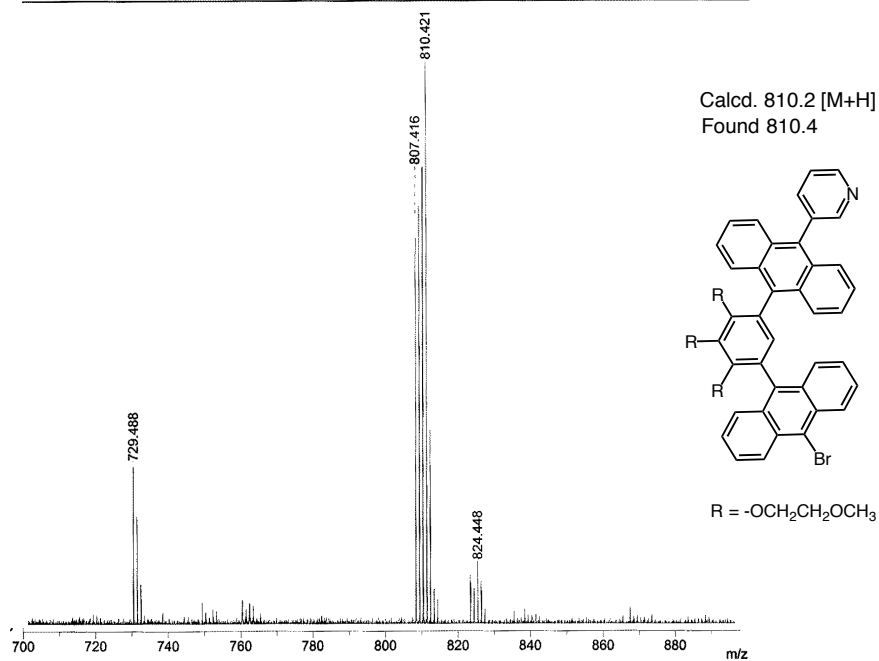**b****Generic Display Report**

|                                                               |                                              |
|---------------------------------------------------------------|----------------------------------------------|
| <b>Analysis Info</b>                                          | <b>Acquisition Date</b> 12/5/2016 2:20:46 PM |
| Analysis Name D:\Data\akita\11yazaki\ky844 HRMS\NO1-NO2 2nd.d | Operator BDAL@DE                             |
| Method Pd_complex2.m                                          | Instrument micrOTOF                          |
| Sample Name NO1 NO2                                           |                                              |
| Comment                                                       |                                              |

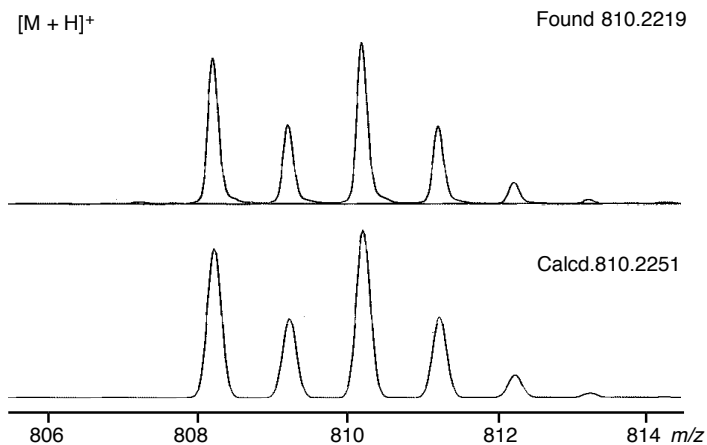

**Supplementary Figure 22** | (a) MALDI-TOF MS (dithranol) and (b) HR MS (ESI) spectra of **6b**.



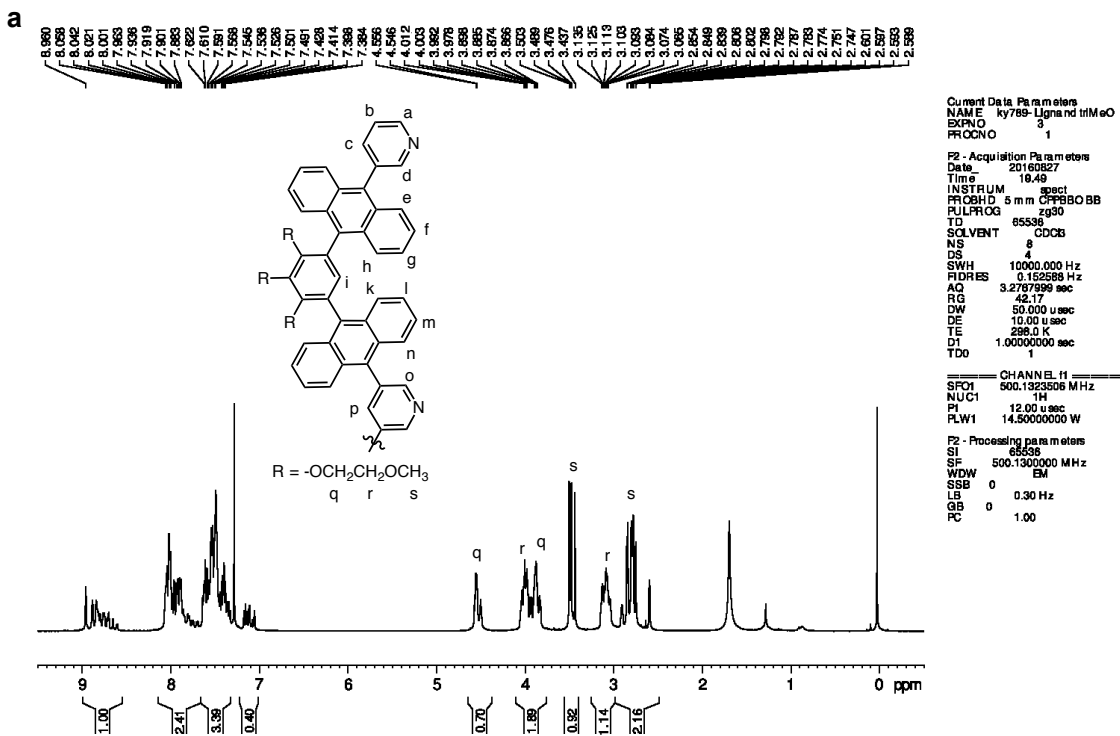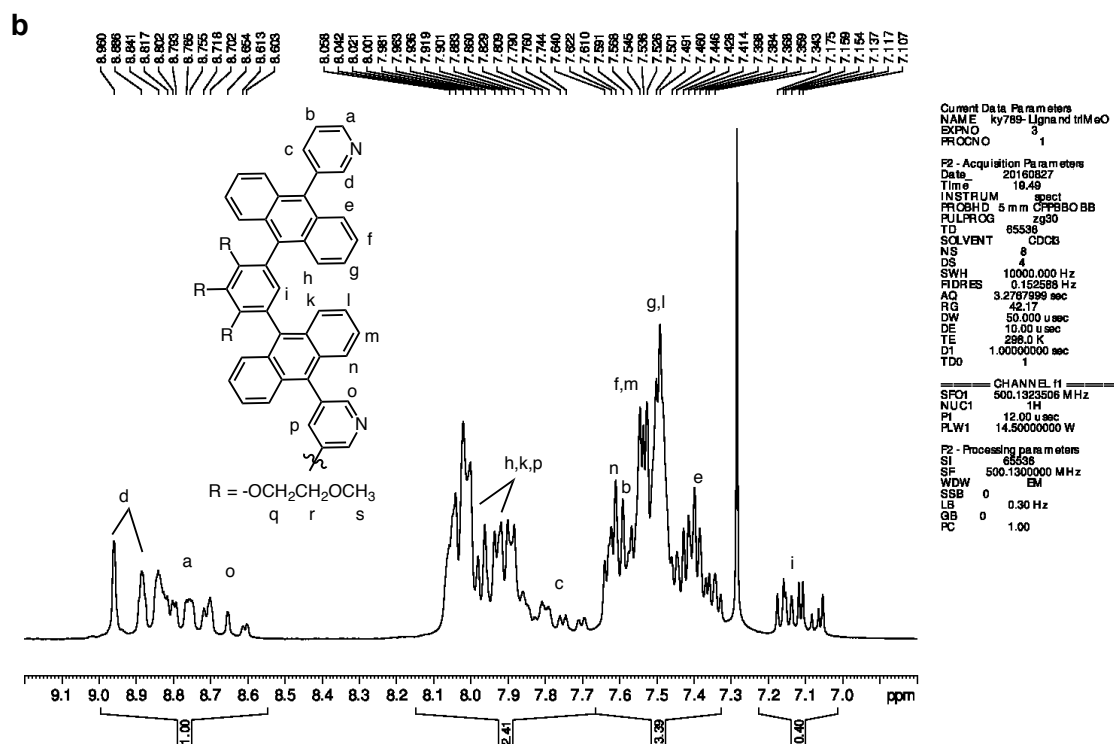

**Supplementary Figure 23** |  $^1\text{H}$  NMR spectra (500 MHz,  $\text{CDCl}_3$ , room temperature) of **1b**. (a) The aromatic and aliphatic and (b) aromatic regions.

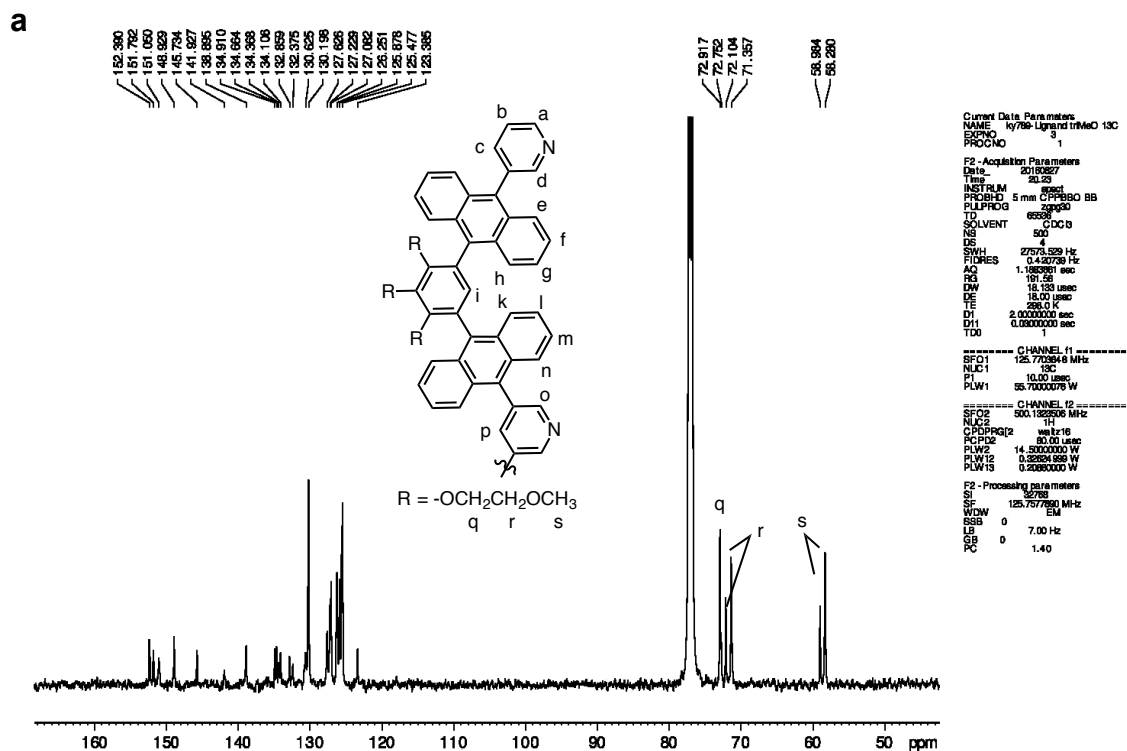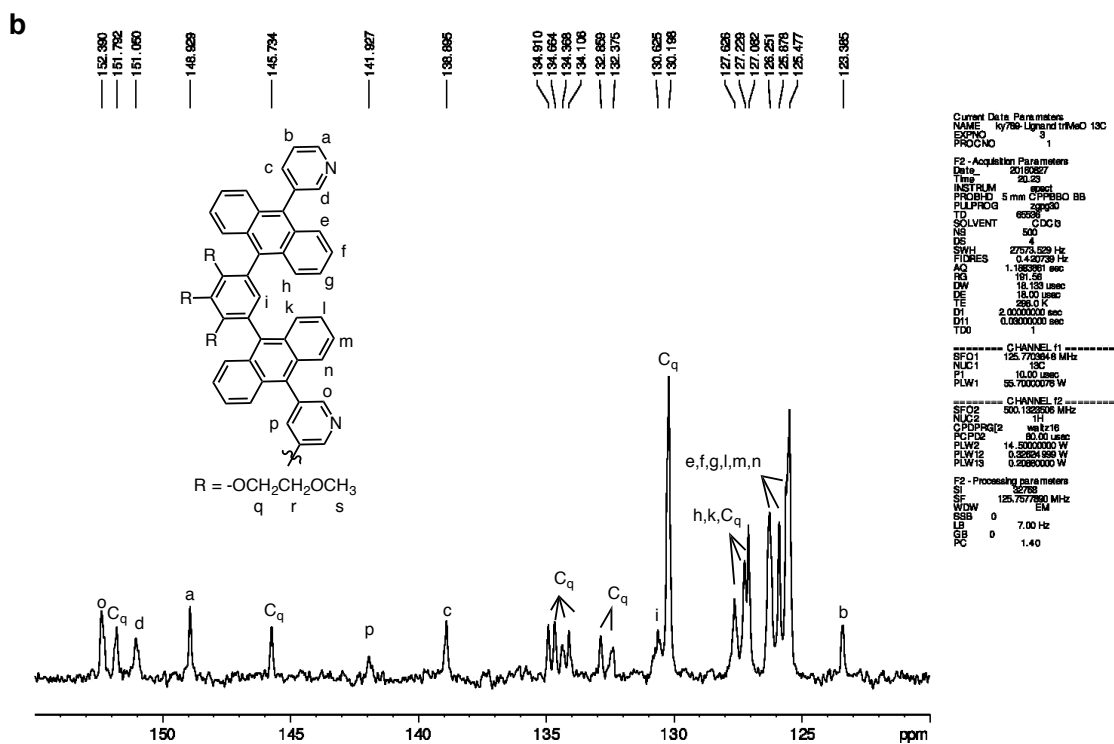

**Supplementary Figure 24** | <sup>13</sup>C NMR spectra (125 MHz, CDCl<sub>3</sub>, room temperature) of **1b**. (a) The aromatic and aliphatic and (b) aromatic regions.

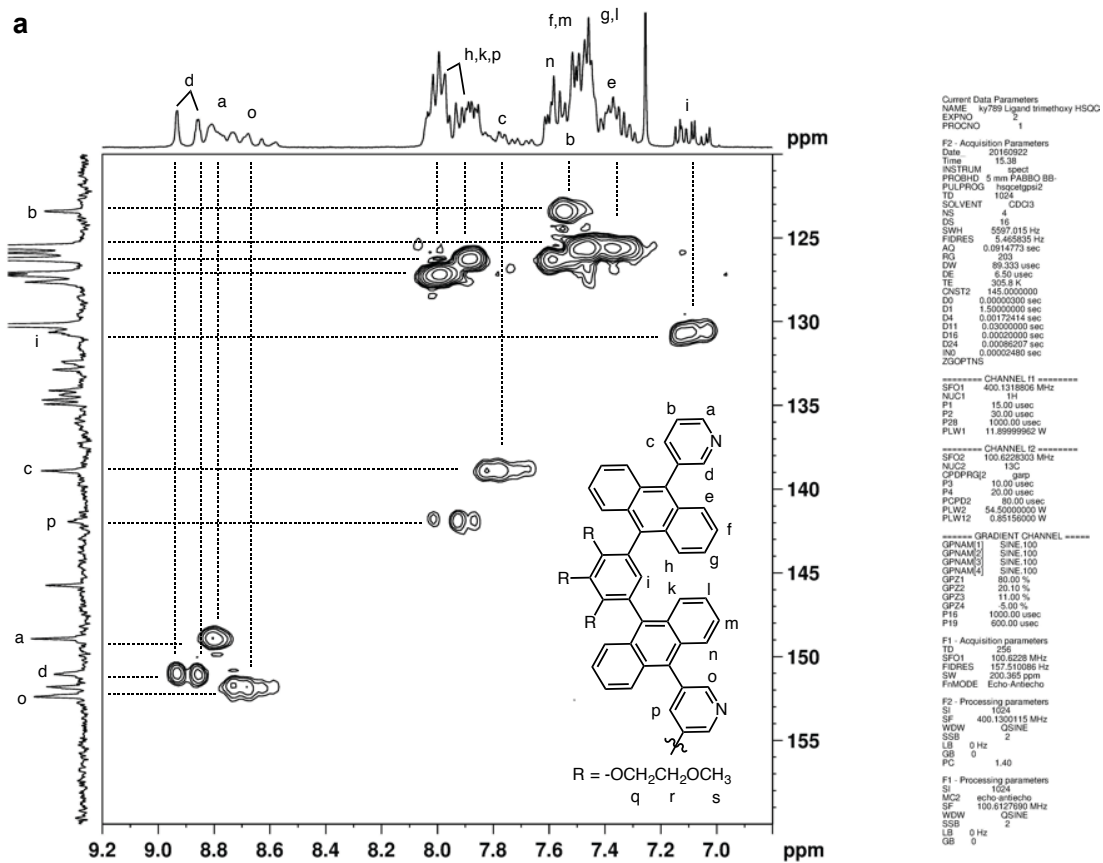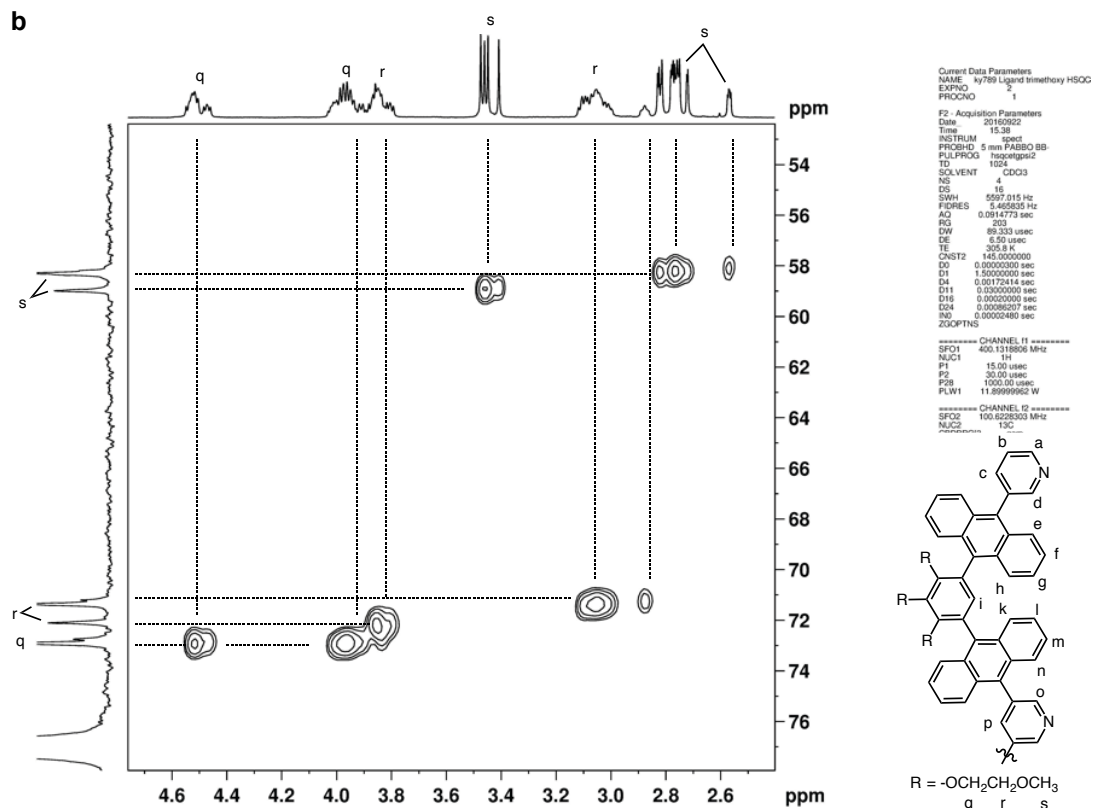

**Supplementary Figure 25** | HSQC spectra (500 MHz, CDCl<sub>3</sub>, room temperature) of **1b**. (a) The aromatic and (b) aliphatic regions.

### Generic Display Report

|                      |                                                 |                         |                      |
|----------------------|-------------------------------------------------|-------------------------|----------------------|
| <b>Analysis Info</b> |                                                 | <b>Acquisition Date</b> | 12/5/2018 2:20:46 PM |
| <b>Analysis Name</b> | D:\Data\akila11\yszaki\ky844 HRMS\NO1-NO2 2nd.d | <b>Operator</b>         | BDAL@DE              |
| <b>Method</b>        | Pd_complex2.m                                   | <b>Instrument</b>       | micrOTOF             |
| <b>Sample Name</b>   | NO1 NO2                                         |                         |                      |
| <b>Comment</b>       |                                                 |                         |                      |

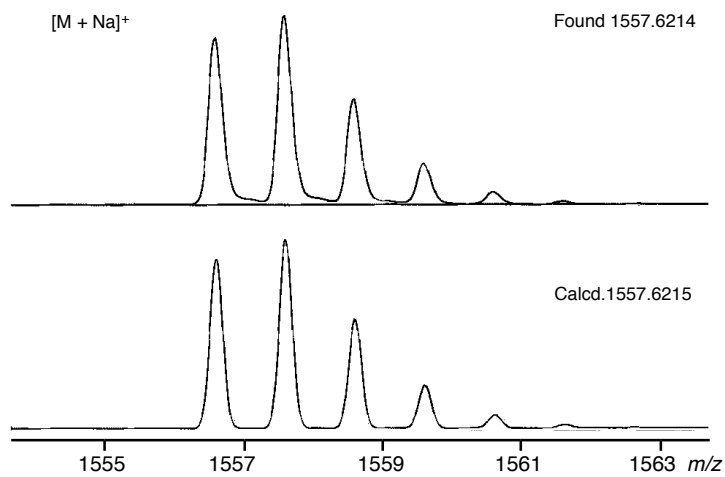

**Supplementary Figure 26 |** HR MS spectrum (ESI) of **1b**.

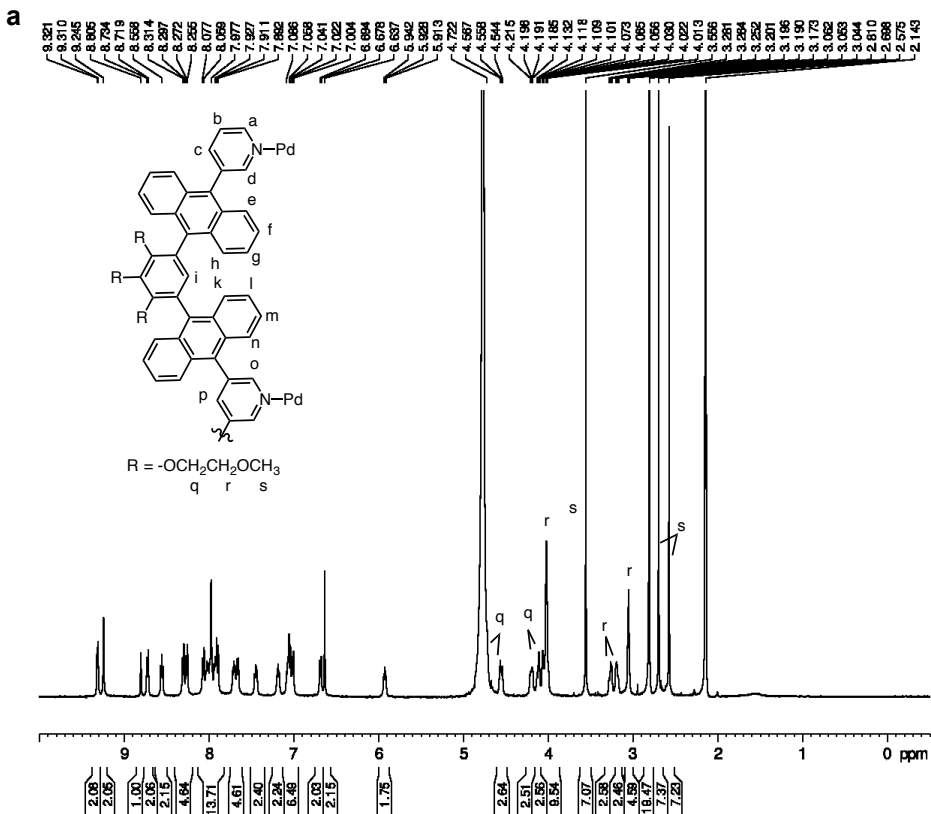

Current Data Parameters  
 NAME ky771-3 d2o CD3CN 10 2  
 EXNO 1  
 PROCNO 1

F2 - Acquisition Parameters  
 Date 20160701  
 Time 1.20  
 INSTRUM spect  
 PROBD 5 mm CFPBBOBB  
 PULPROG zg30  
 TD 65536  
 SOLVENT D2O  
 NS 16  
 DS 4  
 SWH 10000.000 Hz  
 FIDRES 0.152588 Hz  
 AQ 3.2787999 sec  
 RG 48.18  
 DW 50.000 u sec  
 DE 10.00 u sec  
 TE 298.0 K  
 DT 1.00000000 sec  
 TDO 1

CHANNEL 11  
 SFO1 500.1323506 MHz  
 NUC1 1H  
 PI 12.00 u sec  
 PLW1 14.50000000 W

F2 - Processing parameters  
 SI 65536  
 SF 500.1299651 MHz  
 WDW EM  
 SSB 0  
 LB 0.90 Hz  
 GB 0  
 PC 1.00

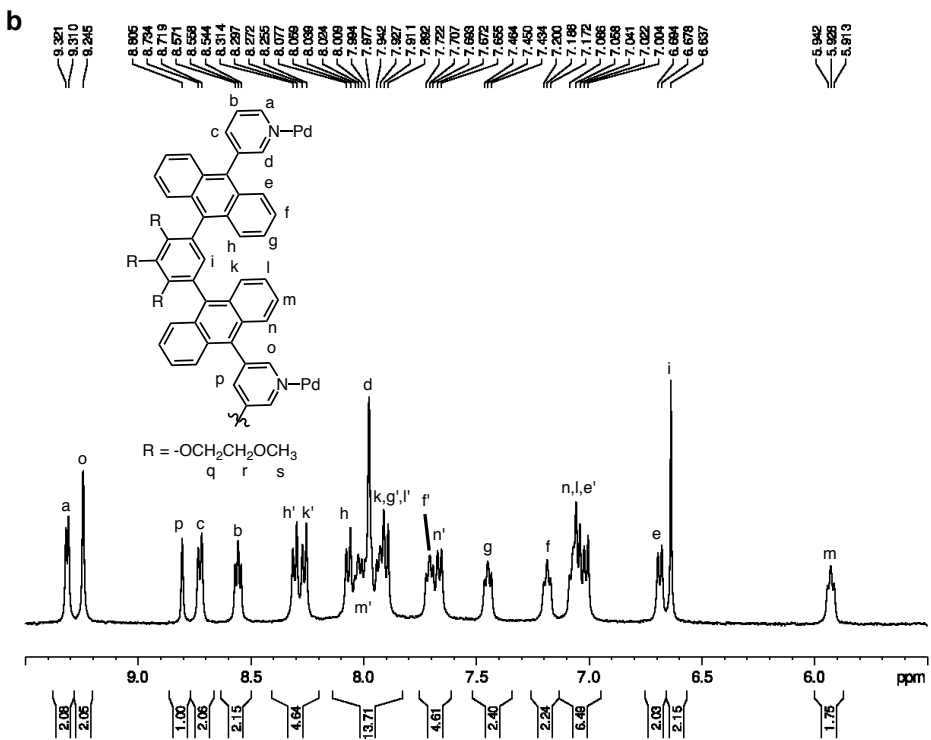

Current Data Parameters  
 NAME ky771-3 d2o CD3CN 10 2  
 EXNO 1  
 PROCNO 1

F2 - Acquisition Parameters  
 Date 20160701  
 Time 1.20  
 INSTRUM spect  
 PROBD 5 mm CFPBBOBB  
 PULPROG zg30  
 TD 65536  
 SOLVENT D2O  
 NS 16  
 DS 4  
 SWH 10000.000 Hz  
 FIDRES 0.152588 Hz  
 AQ 3.2787999 sec  
 RG 48.18  
 DW 50.000 u sec  
 DE 10.00 u sec  
 TE 298.0 K  
 DT 1.00000000 sec  
 TDO 1

CHANNEL 11  
 SFO1 500.1323506 MHz  
 NUC1 1H  
 PI 12.00 u sec  
 PLW1 14.50000000 W

F2 - Processing parameters  
 SI 65536  
 SF 500.1299651 MHz  
 WDW EM  
 SSB 0  
 LB 0.90 Hz  
 GB 0  
 PC 1.00

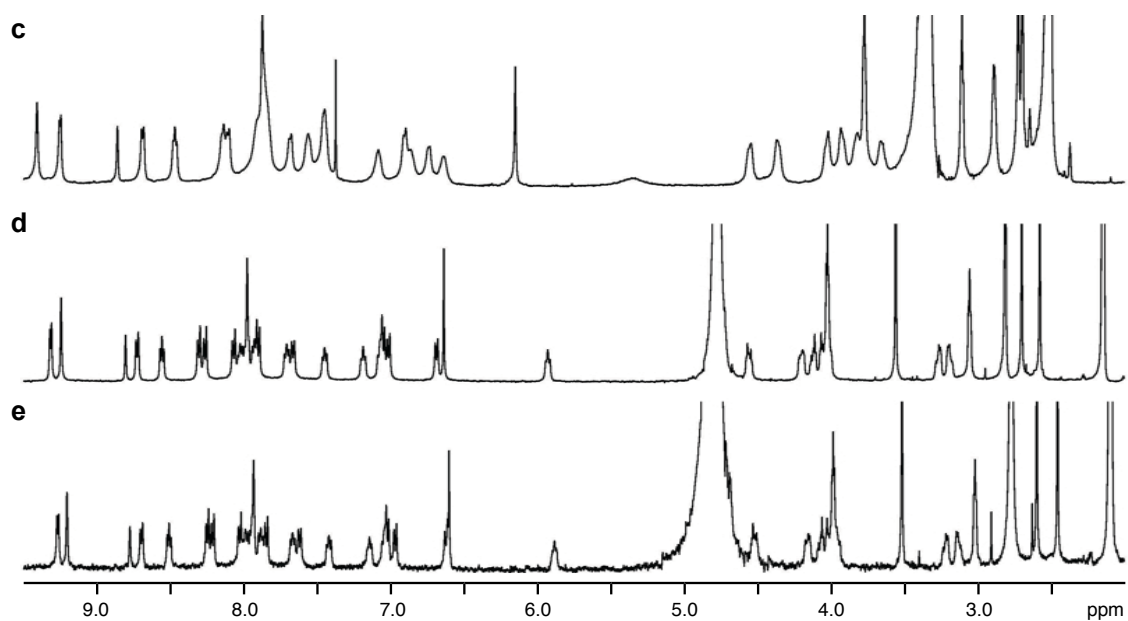

**Supplementary Figure 27** | <sup>1</sup>H NMR spectra (500 MHz, D<sub>2</sub>O:CD<sub>3</sub>CN = 5:1, room temperature) of **2b**. (a) The aromatic and aliphatic and (b) aromatic regions. <sup>1</sup>H NMR spectra (500 MHz, room temperature) of **2b** in (c) DMSO-*d*<sub>6</sub>, (d) D<sub>2</sub>O:CD<sub>3</sub>CN = 5:1, and (e) D<sub>2</sub>O:CD<sub>3</sub>CN = 100:1.

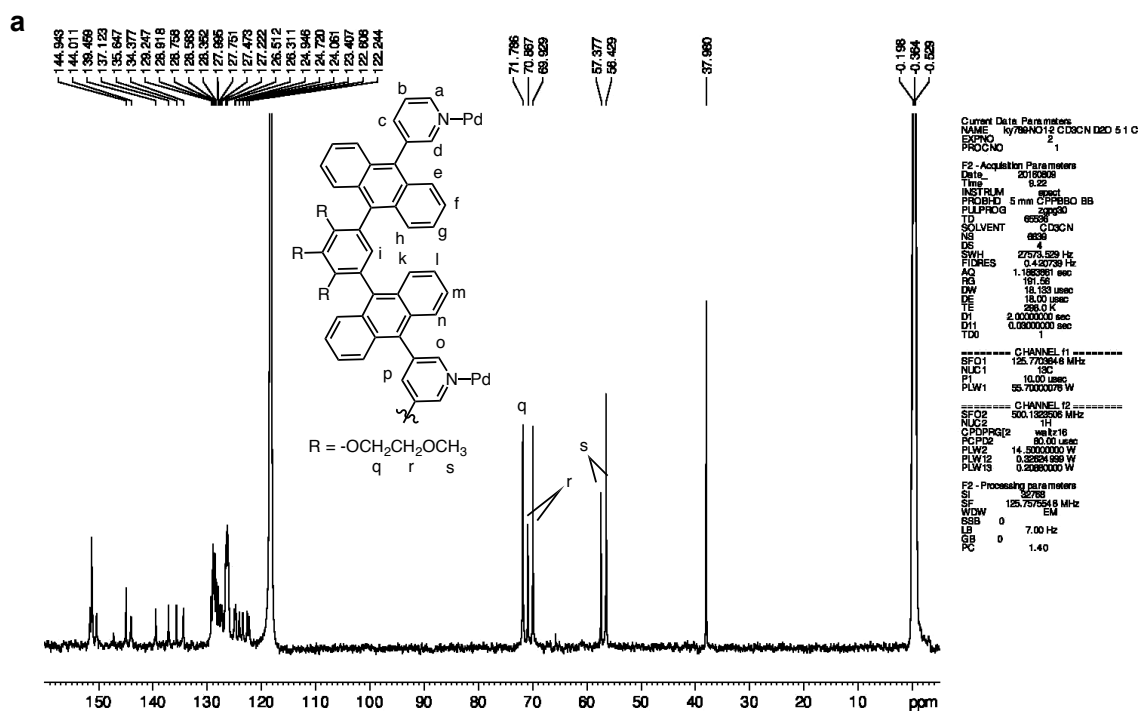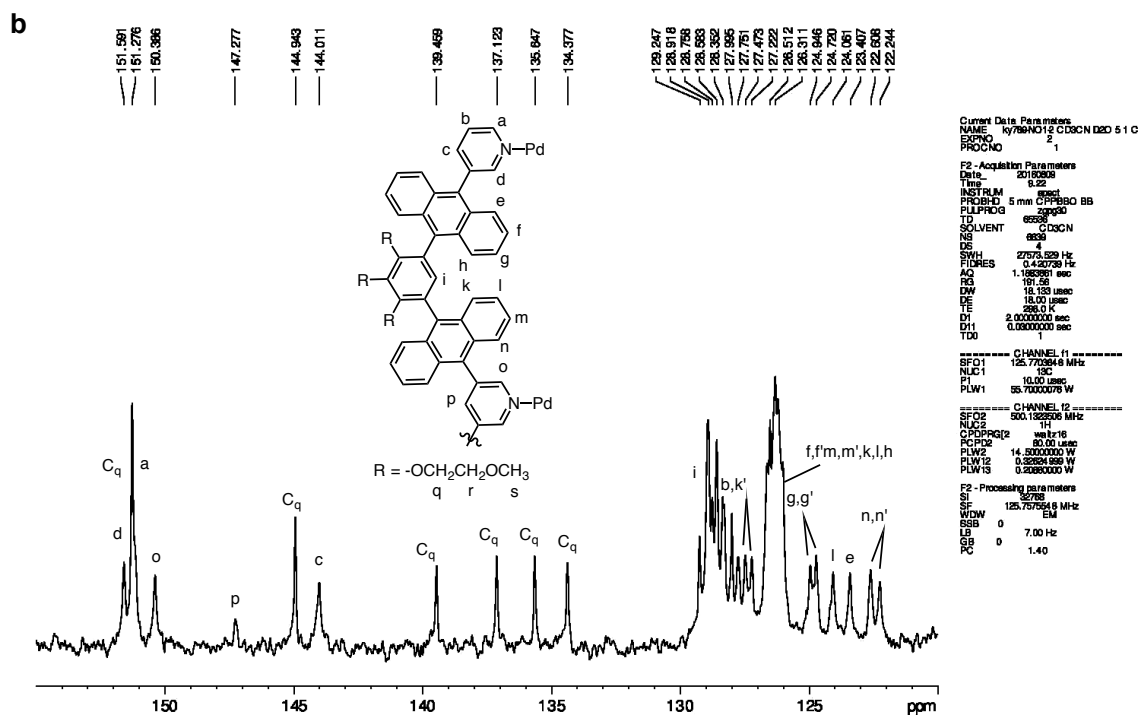

**Supplementary Figure 28** |  $^{13}\text{C}$  NMR spectra (125 MHz,  $\text{D}_2\text{O}:\text{CD}_3\text{CN} = 5:1$ , room temperature) of **2b**. (a) The aromatic and aliphatic and (b) aromatic regions.

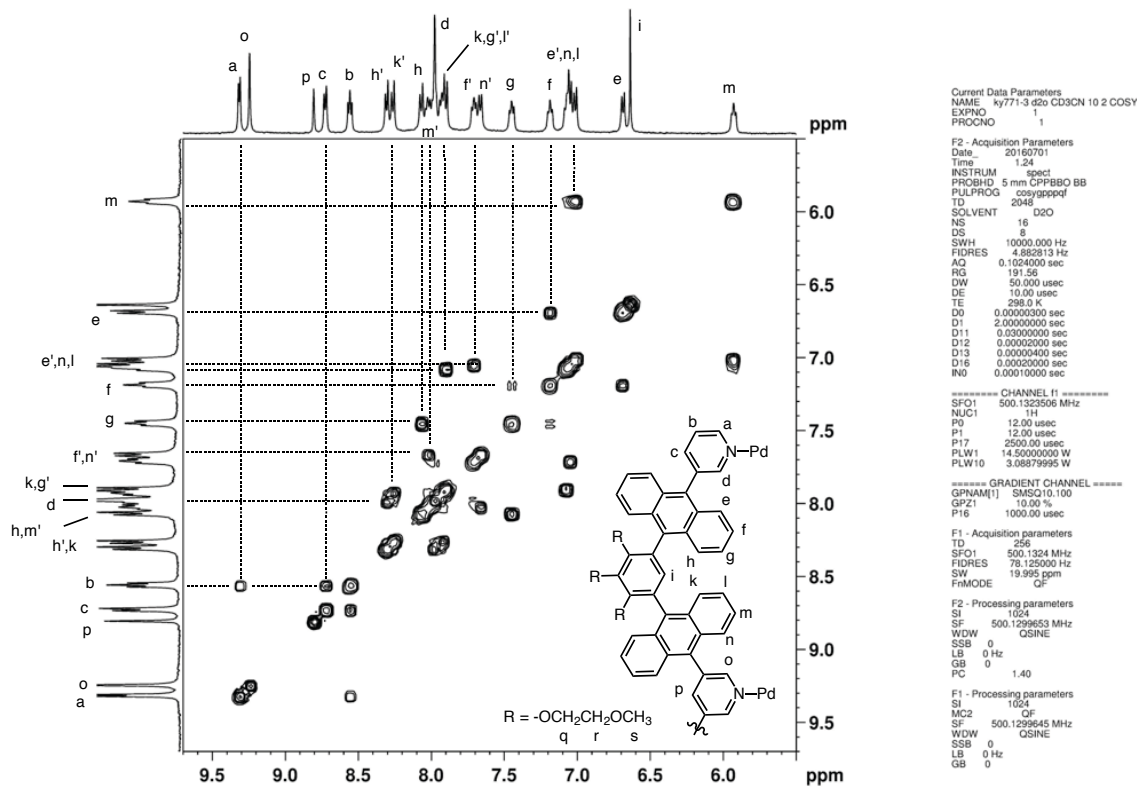

Supplementary Figure 29 | HH COSY spectrum (500 MHz, D<sub>2</sub>O:CD<sub>3</sub>CN = 5:1, room temperature) of **2b**.

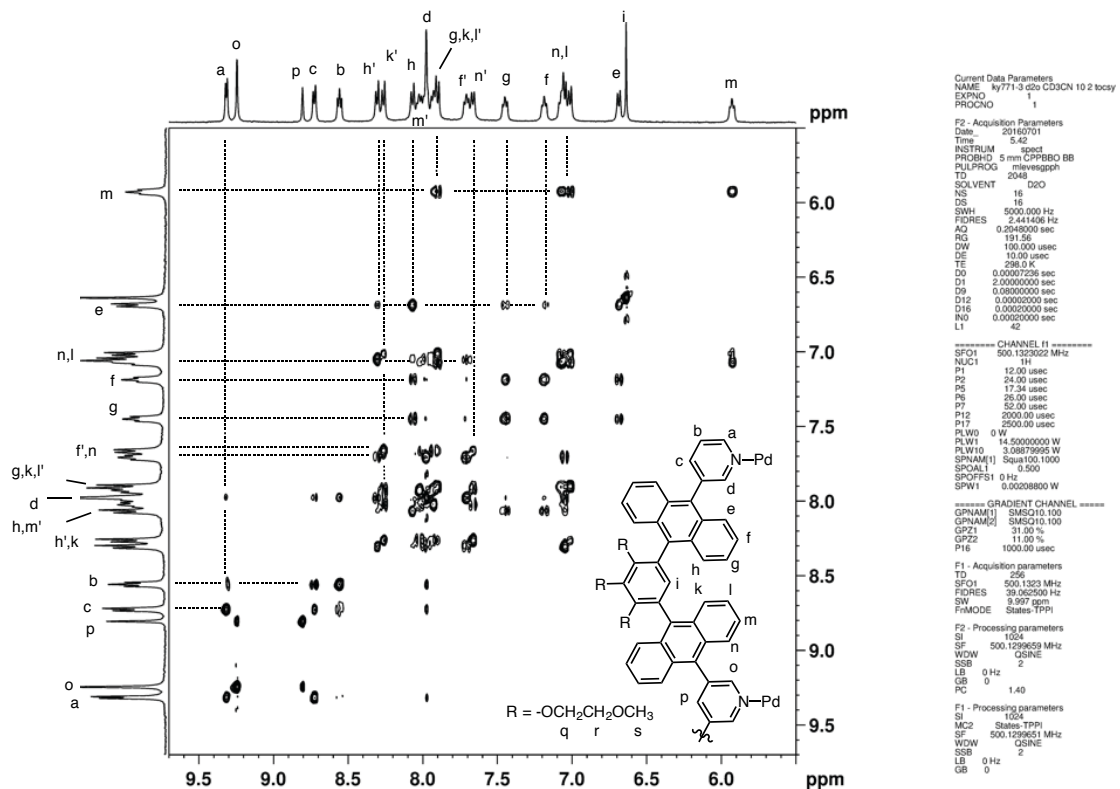

Supplementary Figure 30 | HH TOCSY spectrum (500 MHz, D<sub>2</sub>O:CD<sub>3</sub>CN = 5:1, room temperature) of **2b**.



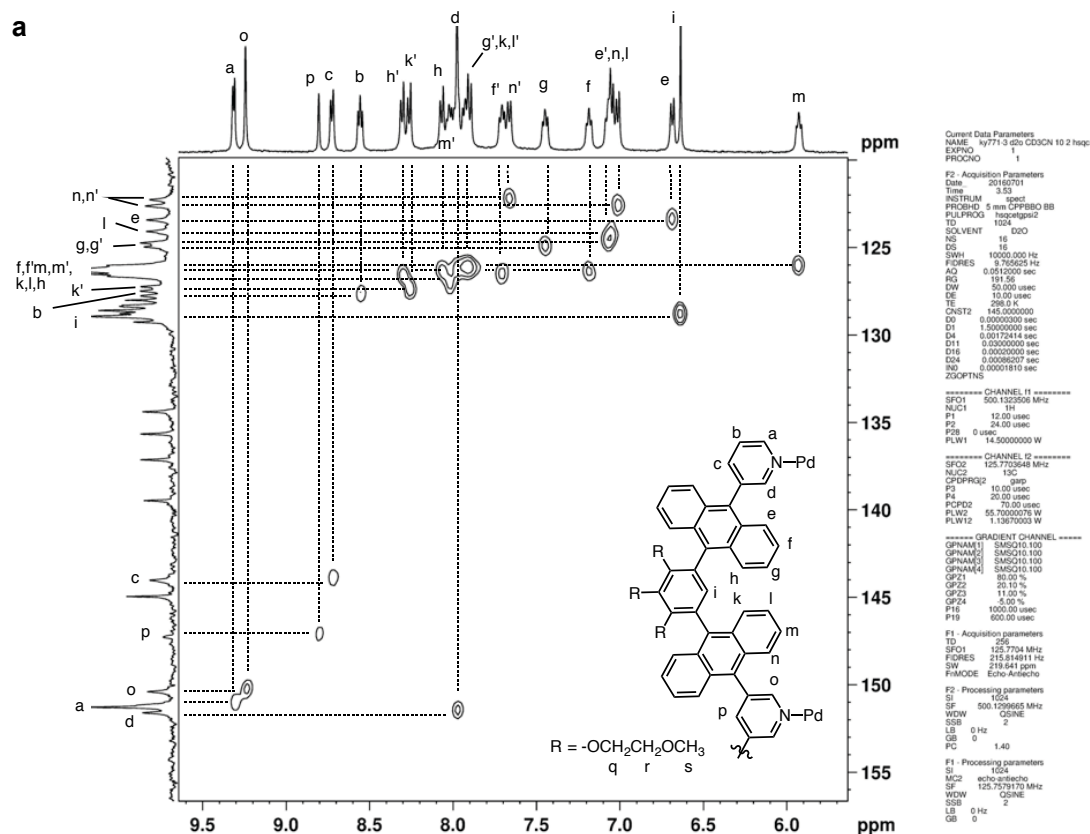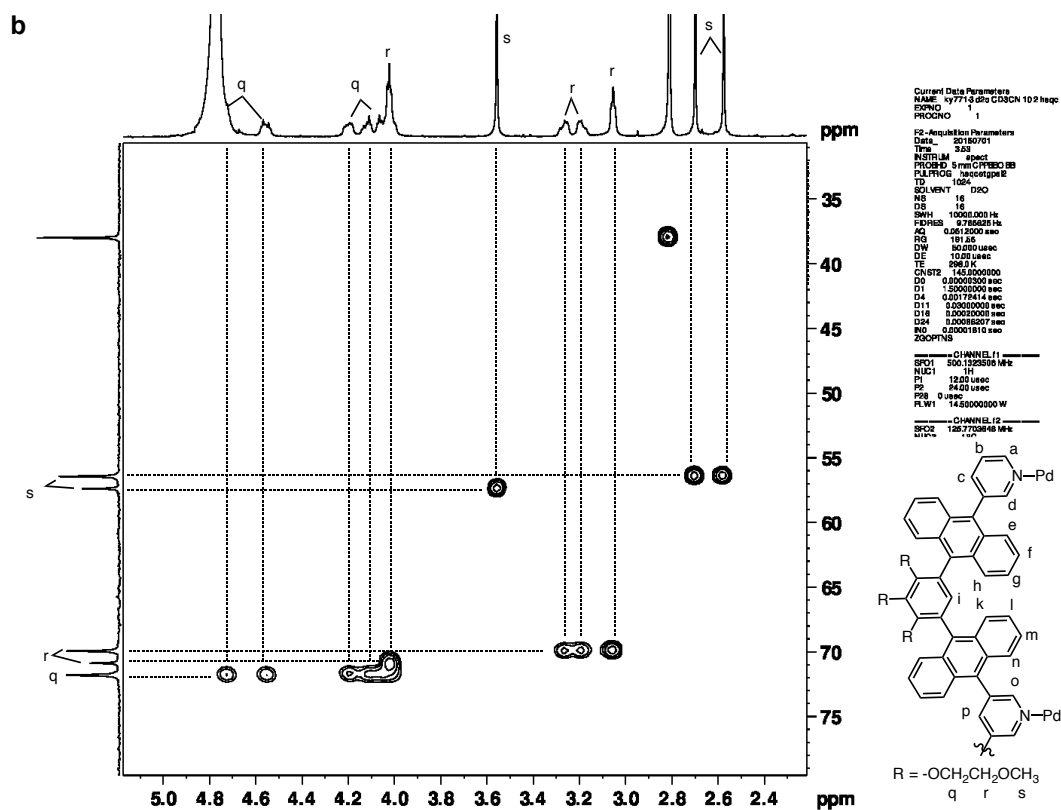

Supplementary Figure 31 | HSQC spectra (500 MHz, D<sub>2</sub>O:CD<sub>3</sub>CN = 5:1, room temperature) of **2b**. (a) The aromatic and (b) aliphatic regions.

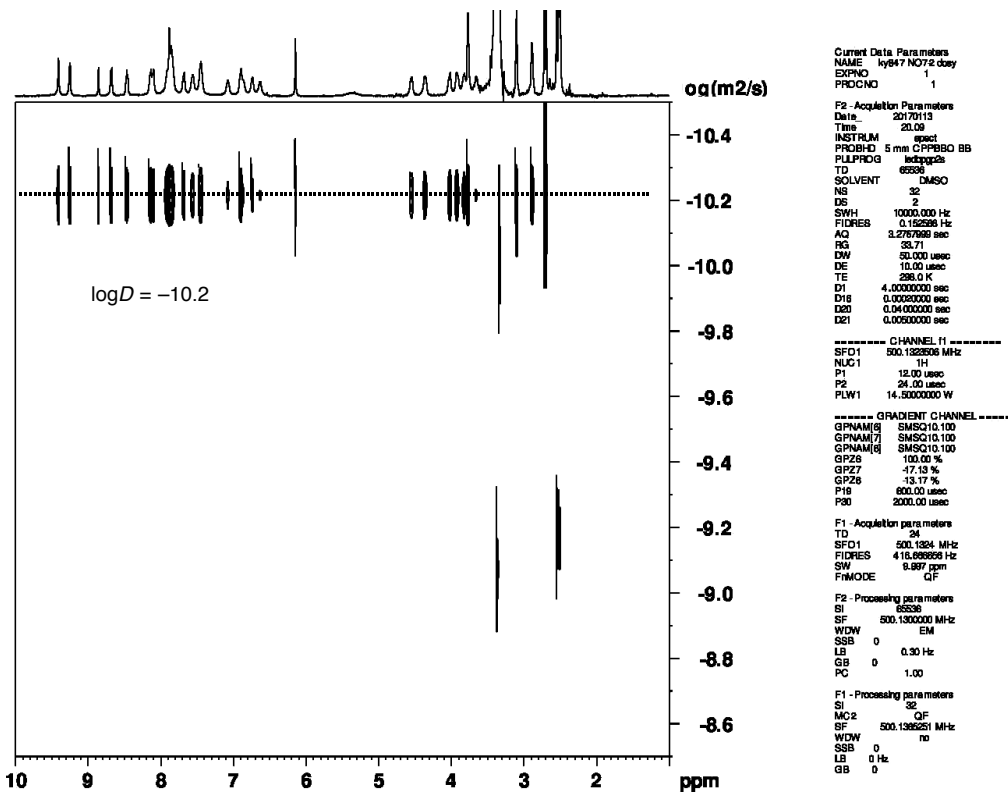

Supplementary Figure 32 | DOSY NMR spectrum (500 MHz, DMSO-*d*<sub>6</sub>, 298 K) of **2b**.

### Generic Display Report

|                                                           |                                       |
|-----------------------------------------------------------|---------------------------------------|
| <b>Analysis Info</b>                                      | Acquisition Date 12/5/2016 2:57:07 PM |
| Analysis Name D:\Data\akita\11yazaki\ky844 HRMS\NO4-NO3.d | Operator BDAL@DE                      |
| Method Pd_complex2.m                                      | Instrument micrOTOF                   |
| Sample Name NO1 NO2                                       |                                       |
| Comment                                                   |                                       |

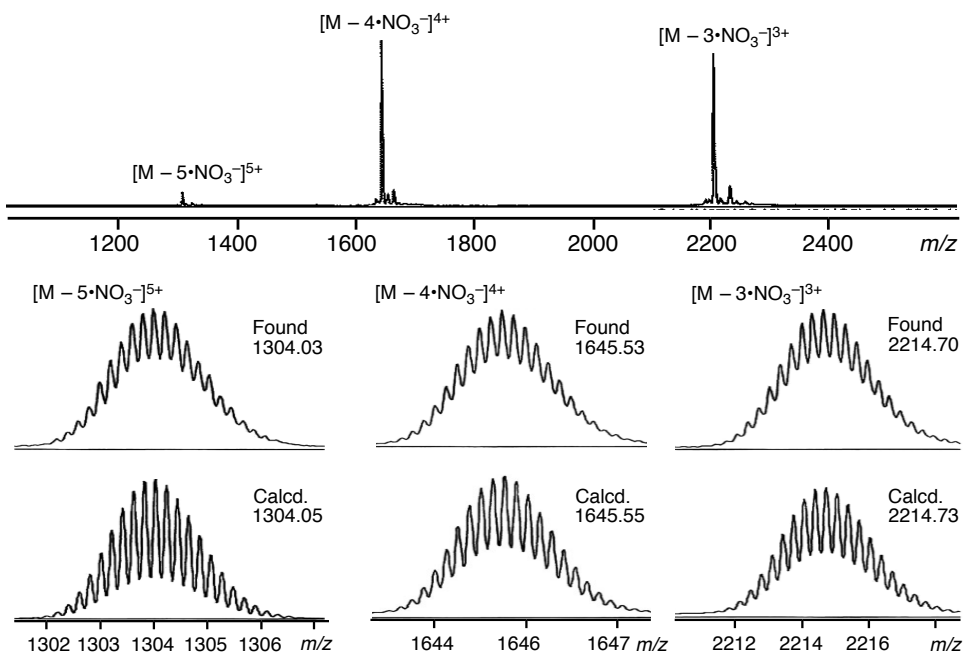

Supplementary Figure 33 | ESI-TOF MS spectrum (CH<sub>3</sub>OH) of **2b**.



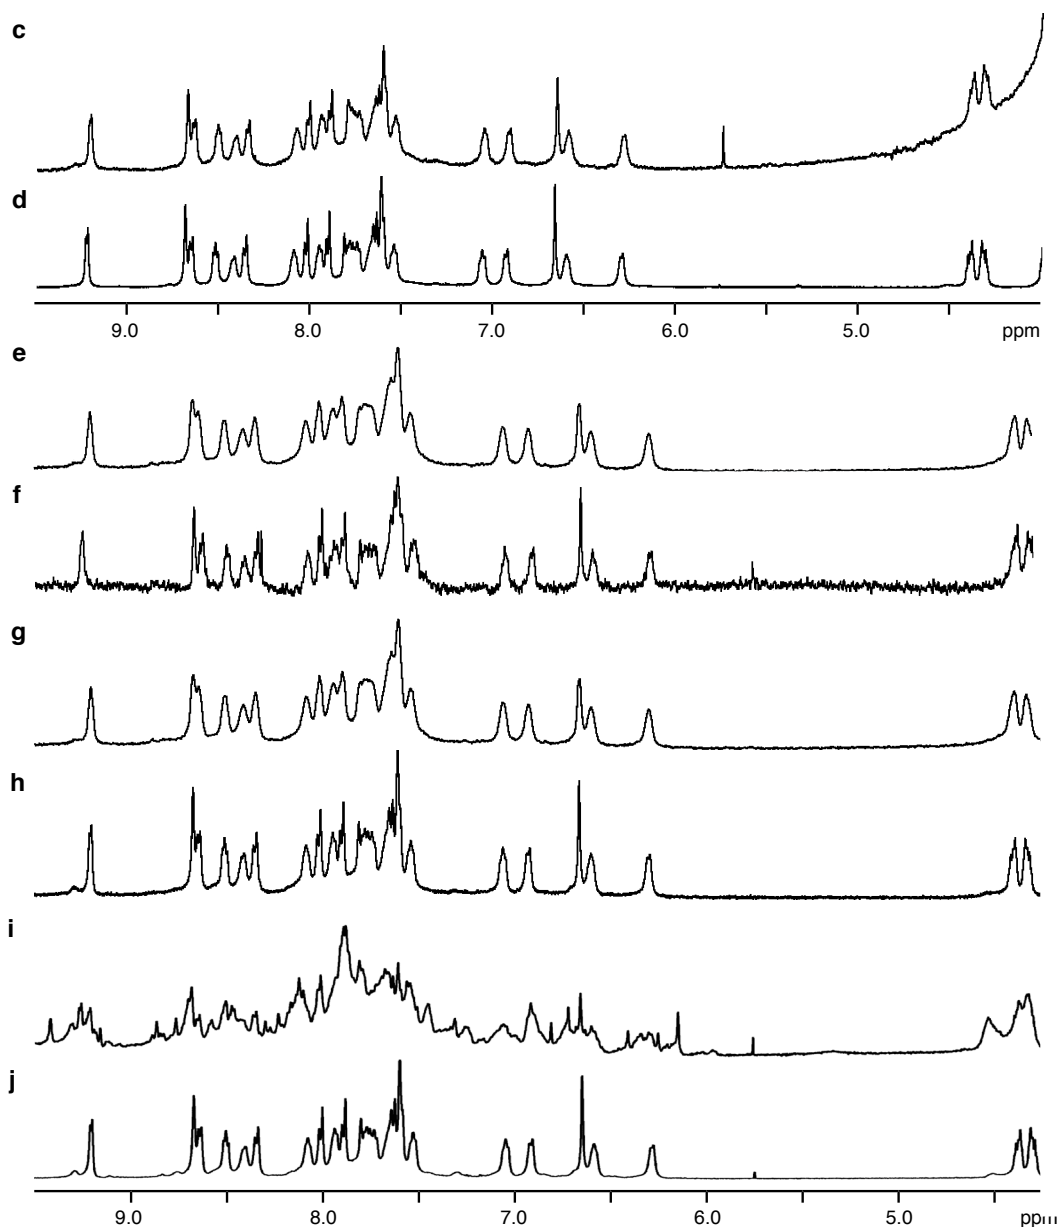

**Supplementary Figure 34** |  $^1\text{H}$  NMR spectra (500 MHz,  $\text{DMSO-}d_6$ , room temperature) of  $(\text{C}_{60})_2@3\mathbf{b}$ . (a) The aromatic and aliphatic and (b) aromatic regions. The  $^1\text{H}$  NMR spectra of  $(\text{C}_{60})_2@3\mathbf{b}$  obtained by (c) the route 1 and (d) the route 2. Concentration-dependent  $^1\text{H}$  NMR spectra of  $(\text{C}_{60})_2@3\mathbf{b}$  in (e) 0.36 mM and (f) 5.0  $\mu\text{M}$  and time-dependent  $^1\text{H}$  NMR spectra of  $(\text{C}_{60})_2@3\mathbf{b}$  after (g) 10 min and (h) 5 d at room temperature.  $^1\text{H}$  NMR spectra of a mixture of  $2\mathbf{b}$  and  $\text{C}_{60}$  after (i) 6 h at 70  $^\circ\text{C}$  and (j) 3 h at 110  $^\circ\text{C}$ .



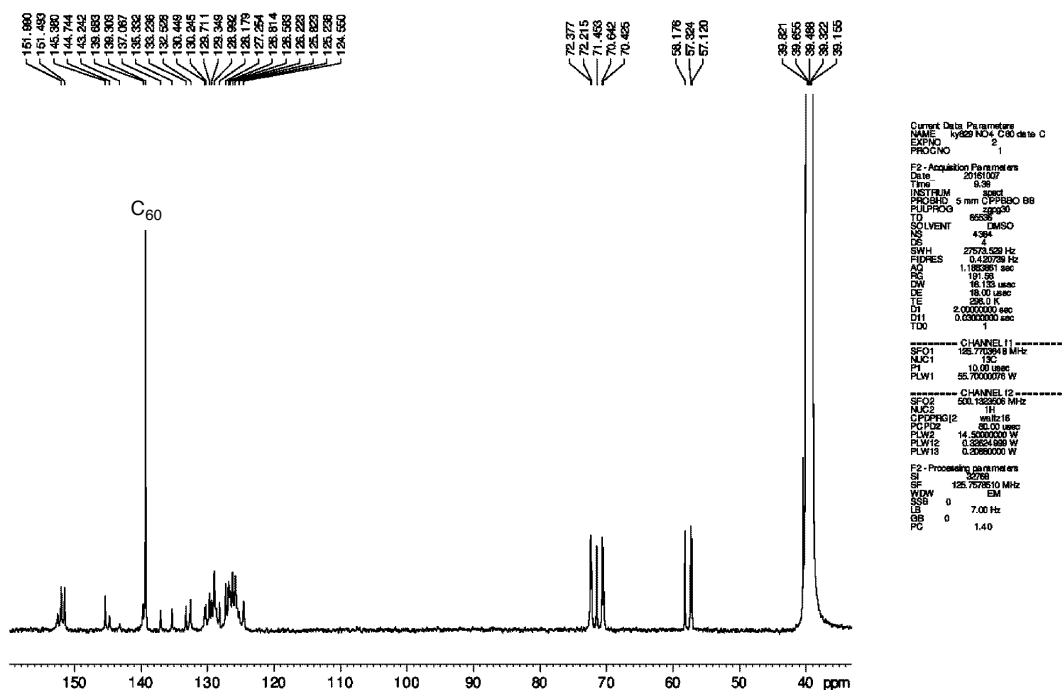

Supplementary Figure 36 |  $^{13}\text{C}$  NMR spectrum (125 MHz,  $\text{DMSO-}d_6$ , room temperature) of  $(\text{C}_{60})_2@3b$ .

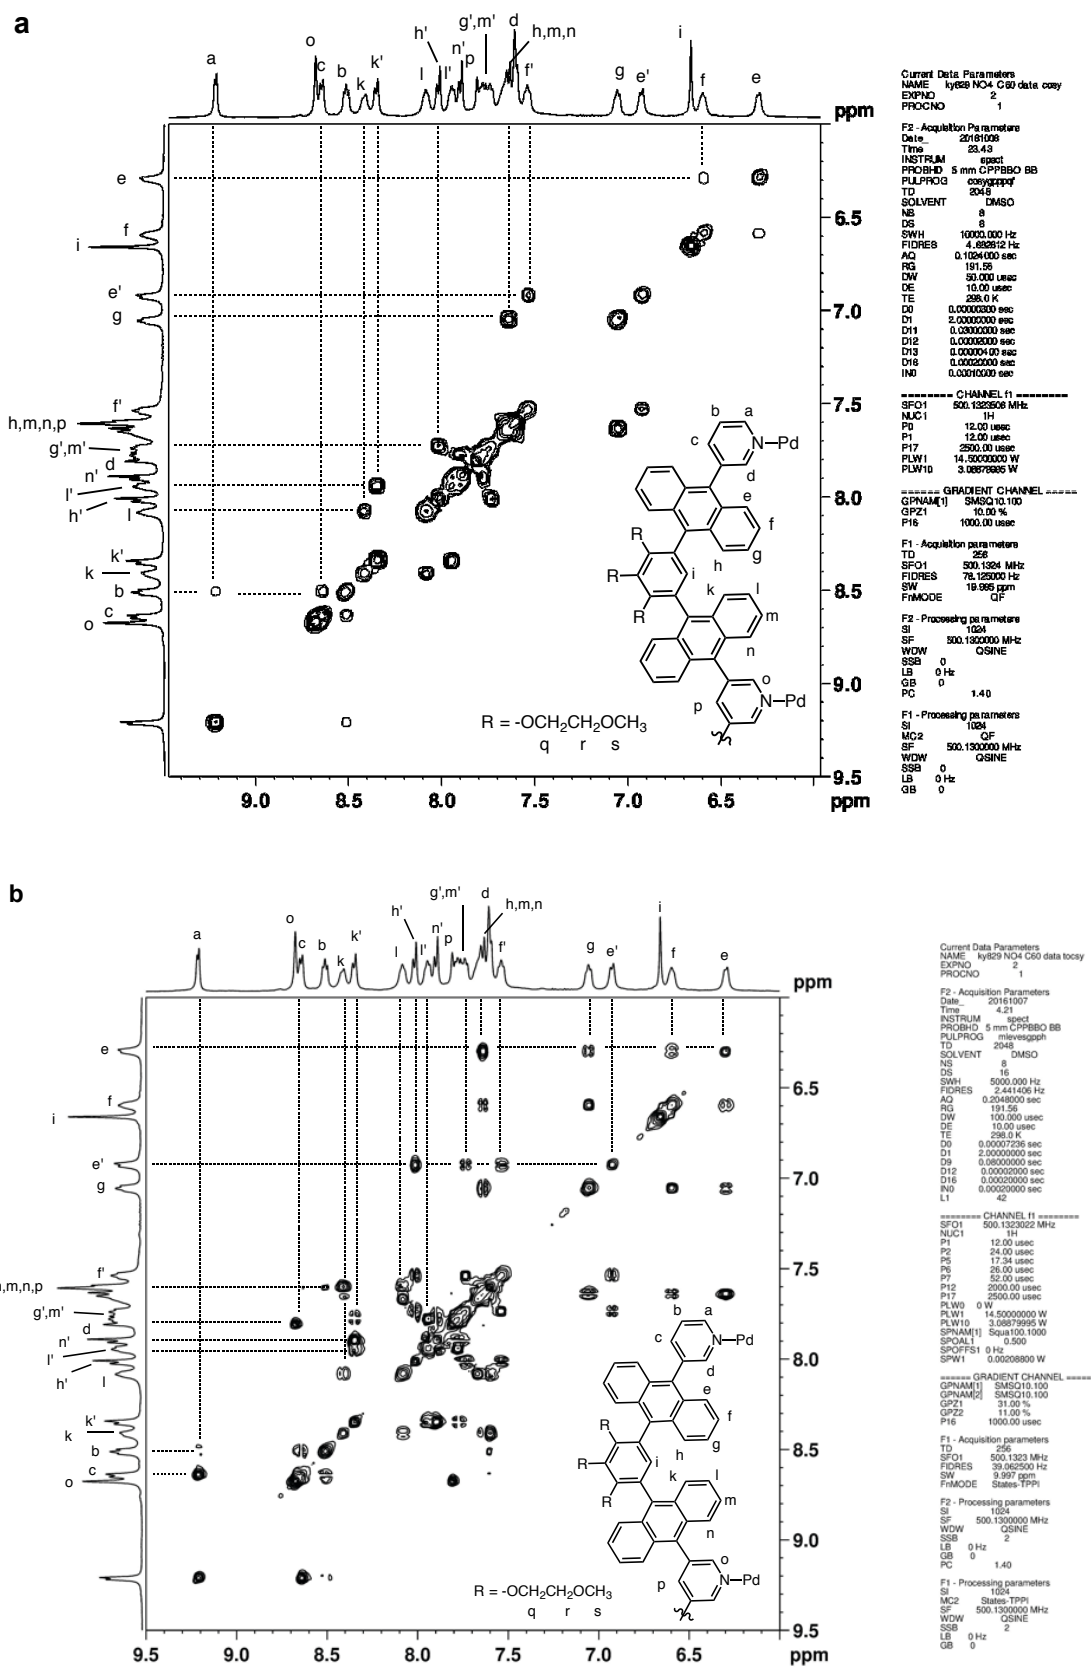

**Supplementary Figure 37** | (a) HH COSY and (b) HH TOCSY spectra (500 MHz, DMSO-*d*<sub>6</sub>, room temperature) of (C<sub>60</sub>)<sub>2</sub>@**3b**.

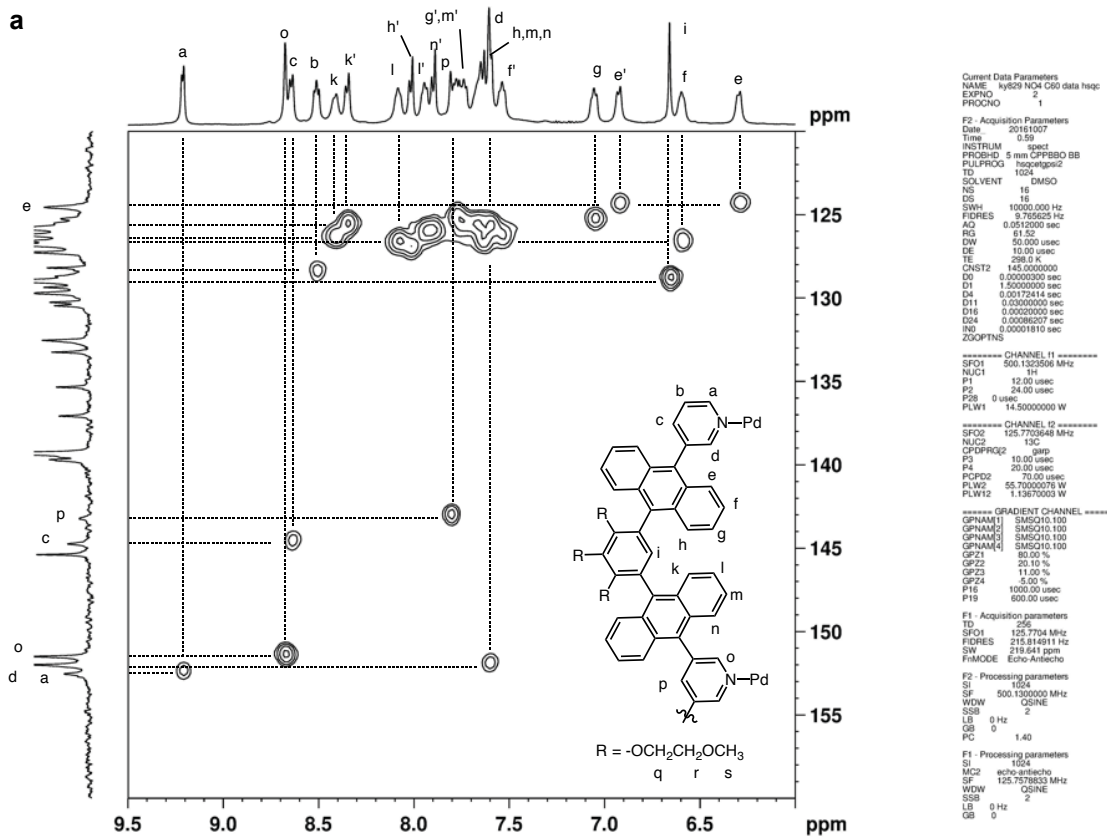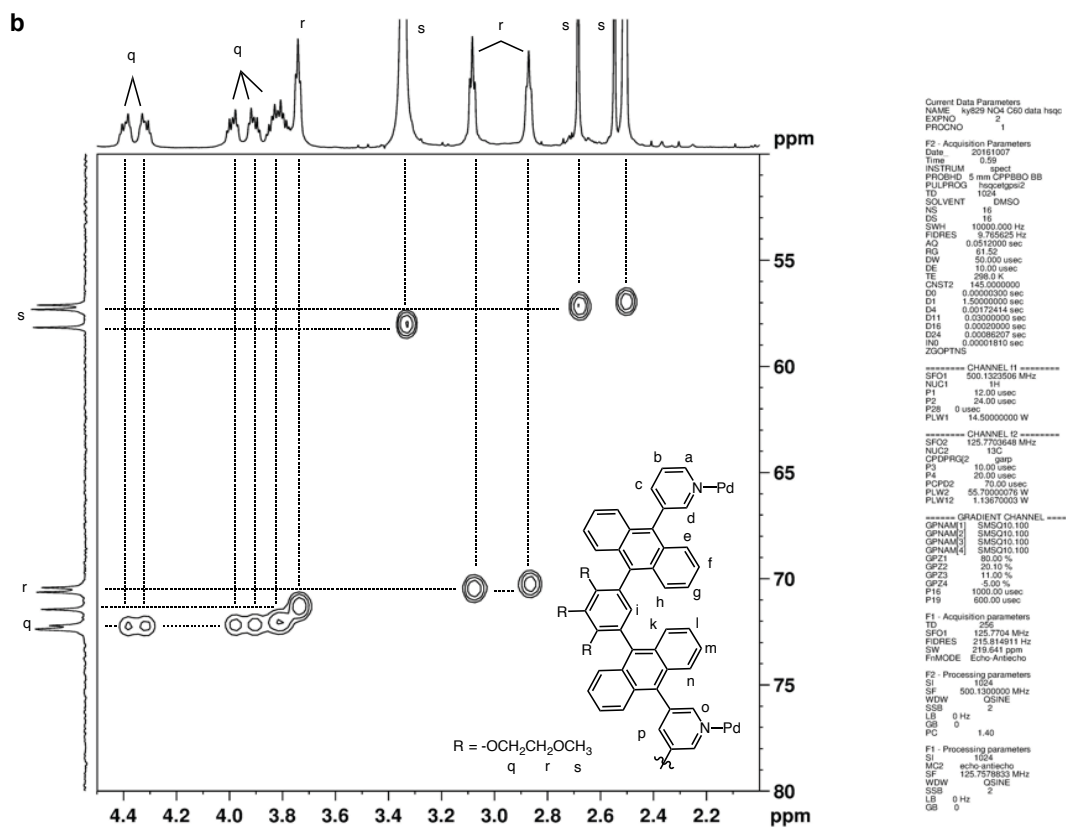

**Supplementary Figure 38** | HSQC spectra (500 MHz, DMSO-*d*<sub>6</sub>, room temperature) of (C<sub>60</sub>)<sub>2</sub>@**3b**. (a) The aromatic and (b) aliphatic regions.



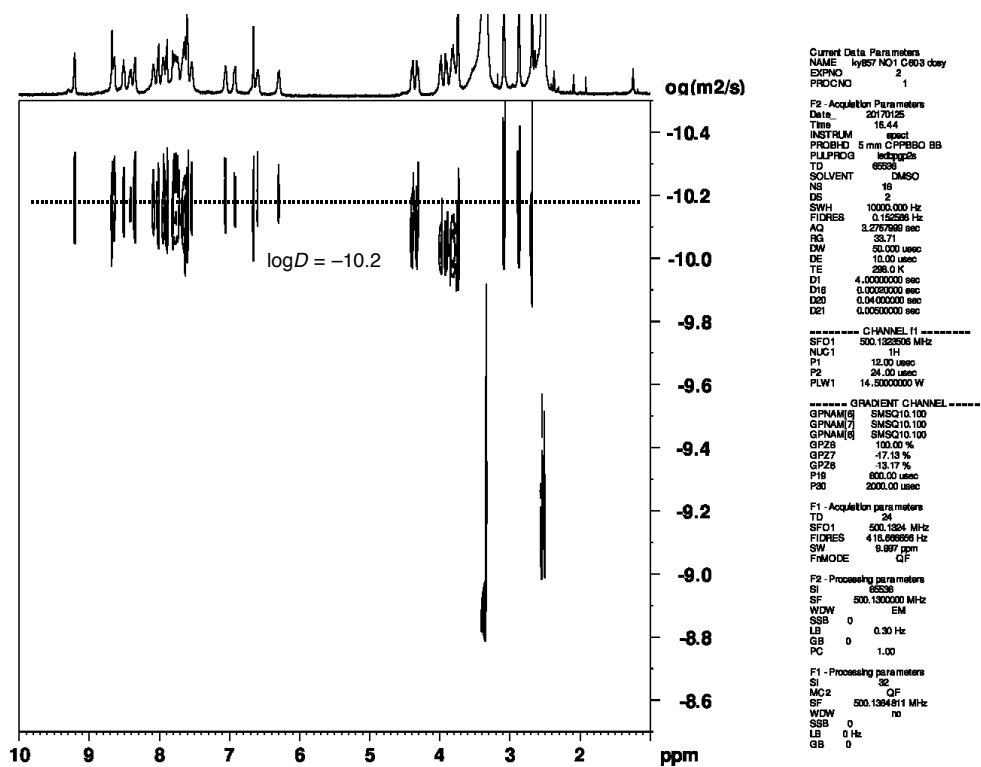

Supplementary Figure 39 | DOSY NMR spectrum (500 MHz, DMSO-*d*<sub>6</sub>, 298 K) of (C<sub>60</sub>)<sub>2</sub>@**3b**.

**a****Generic Display Report****Analysis Info**

Analysis Name D:\Data\akita\11yazaki\ky801\C60-02.d  
Method Pd\_complex2.m  
Sample Name TL3-12b-  
Comment

Acquisition Date 10/5/2016 8:19:07 PM

Operator BDAL@DE  
Instrument micrOTOF

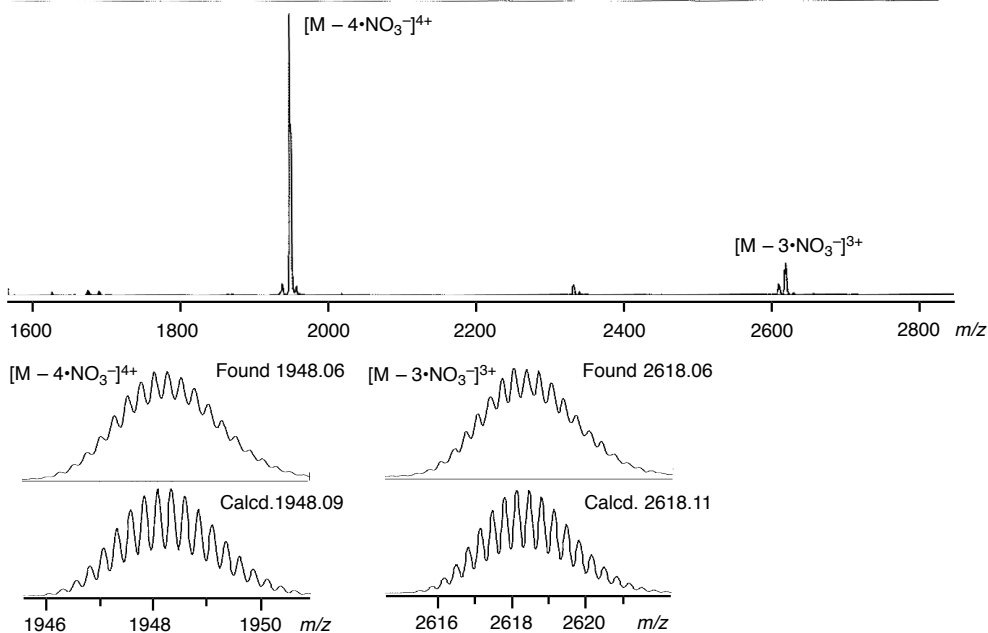**b****Generic Display Report****Analysis Info**

Analysis Name D:\Data\akita\11yazaki\ky862\2.d  
Method esi\_posi\_wide.m  
Sample Name RuC4TMSAA\_2  
Comment

Acquisition Date 2017/03/17 19:02:58

Operator BDAL@DE  
Instrument micrOTOF

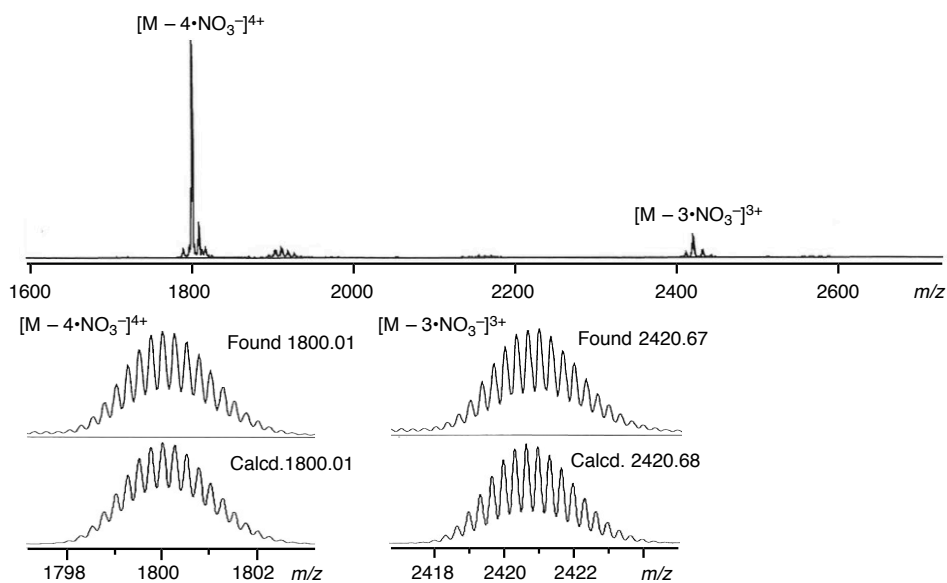

**Supplementary Figure 40** | ESI-TOF MS spectra (CH<sub>3</sub>CN) of (a) (C<sub>60</sub>)<sub>2</sub>@3b and (b) (C<sub>60</sub>)<sub>2</sub>@3a.

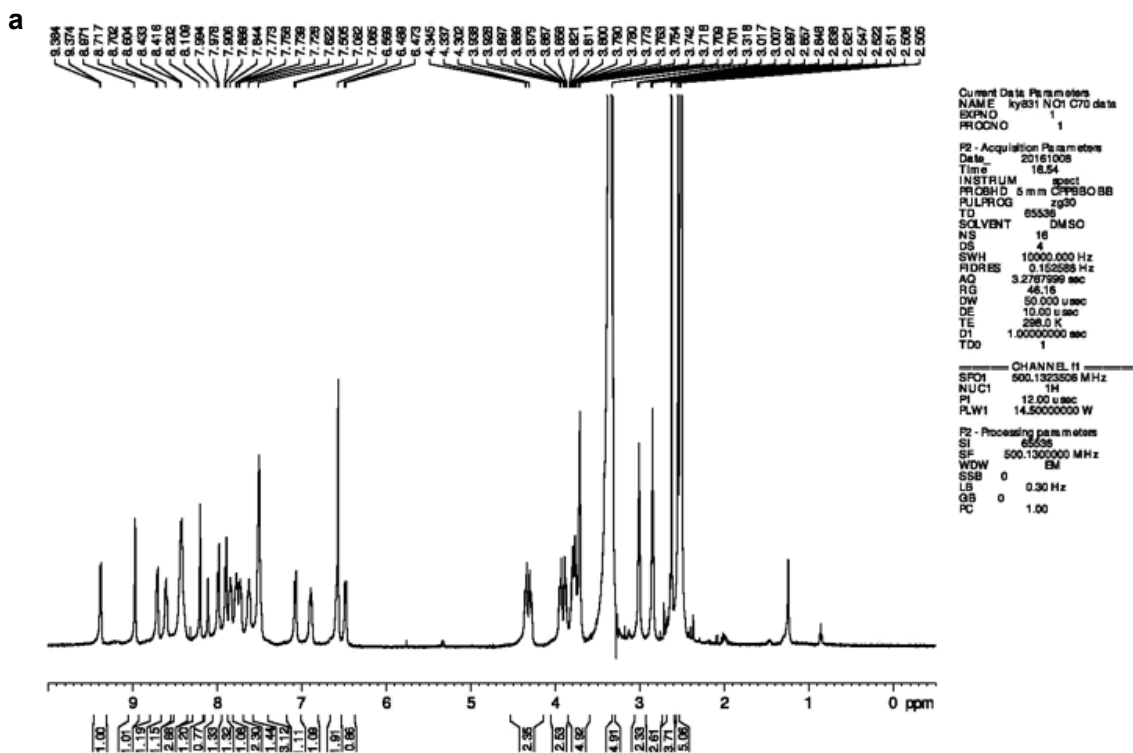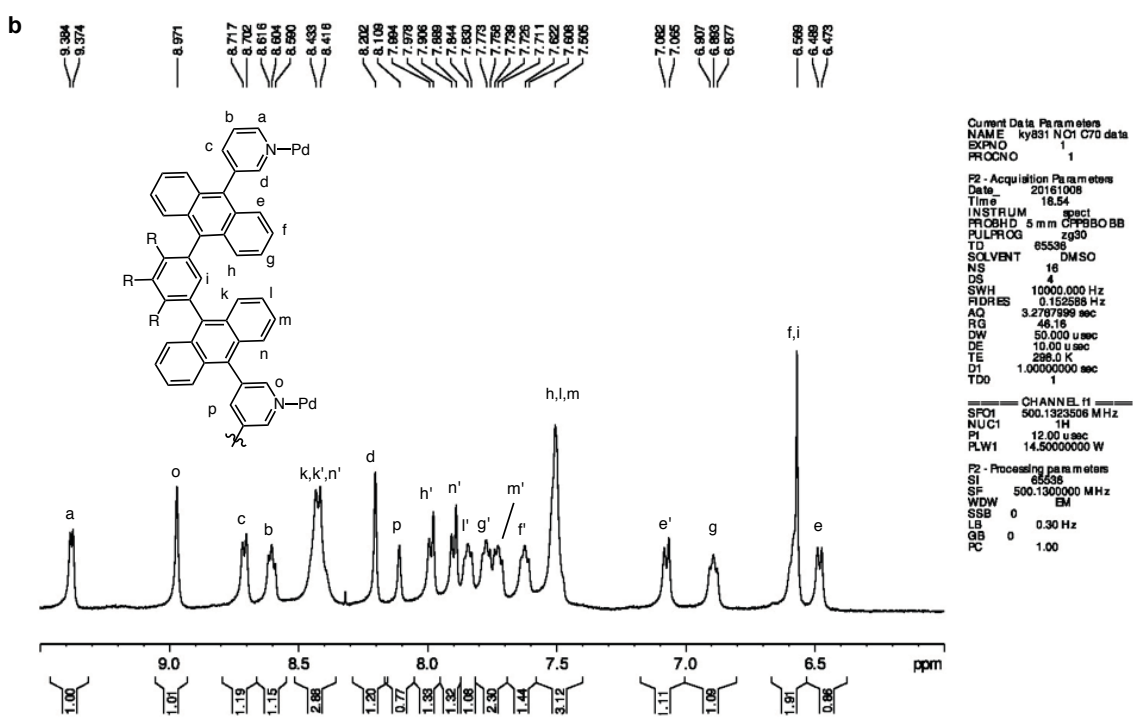

**Supplementary Figure 41** |  $^1\text{H}$  NMR spectra (500 MHz,  $\text{DMSO}-d_6$ , room temperature) of  $(\text{C}_{70})_2@3\mathbf{b}$ . (a) The aromatic and aliphatic and (b) aromatic regions.

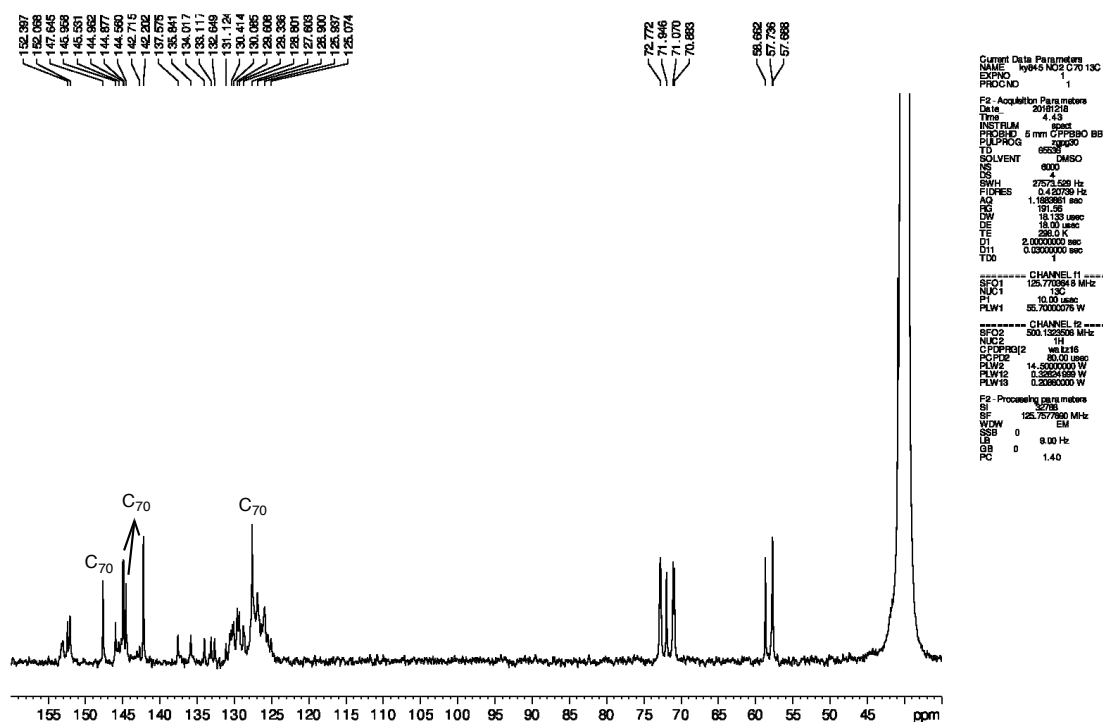

Supplementary Figure 42 |  $^{13}\text{C}$  NMR spectrum (125 MHz,  $\text{DMSO-}d_6$ , room temperature) of  $(\text{C}_{70})_2@3b$ .

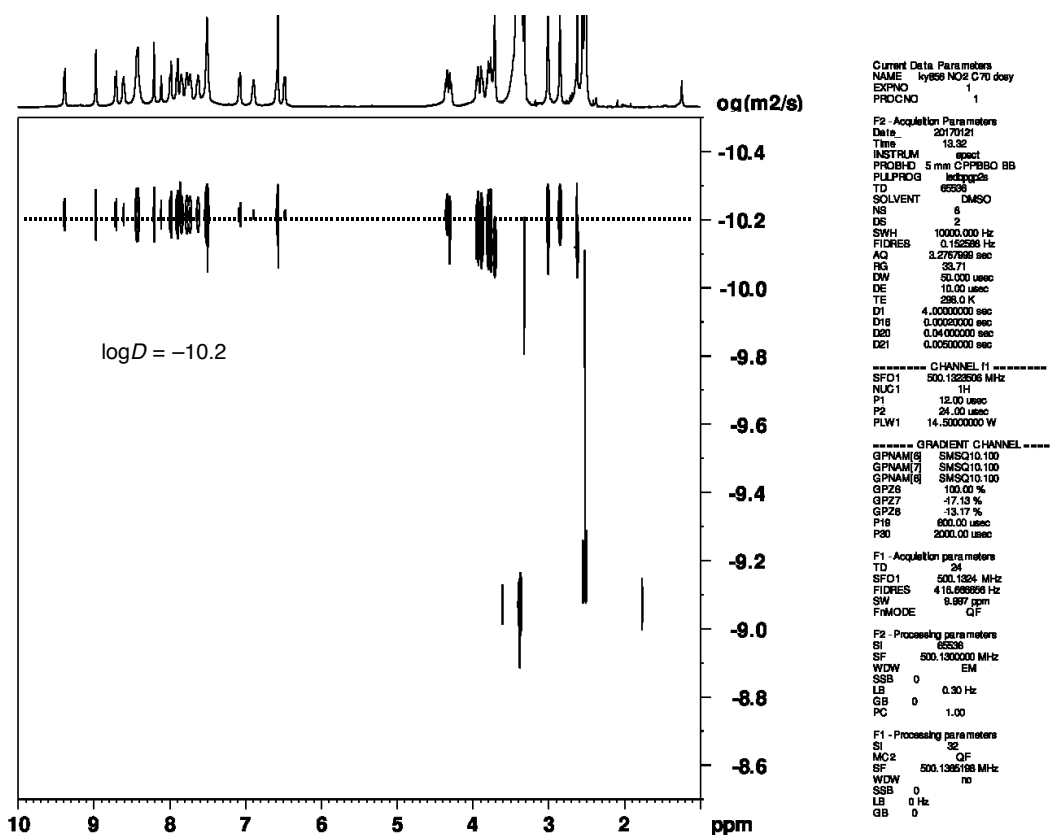

Supplementary Figure 43 | DOSY NMR spectrum (500 MHz,  $\text{DMSO-}d_6$ , 298 K) of  $(\text{C}_{70})_2@3b$ .

## Generic Display Report

### Analysis Info

Analysis Name D:\Data\takita\11yazaki\ky831\WO1 a.d  
Method Pd\_complex2.m  
Sample Name LW30-  
Comment

Acquisition Date 10/6/2016 5:17:09 PM

Operator BDAL@DE  
Instrument micrOTOF

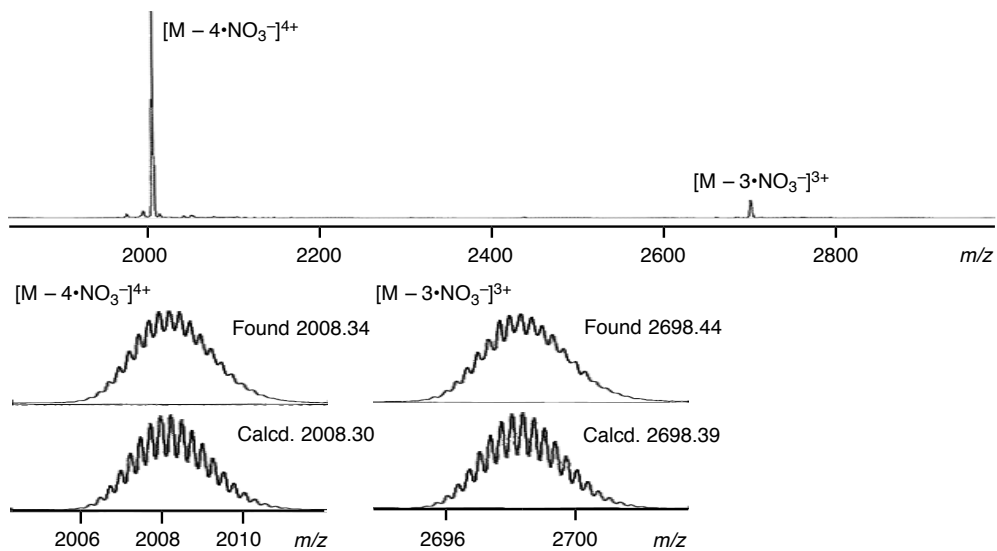

**Supplementary Figure 44** | ESI-TOF MS spectrum ( $CH_3CN$ ) of  $(C_{70})_2@3b$ .

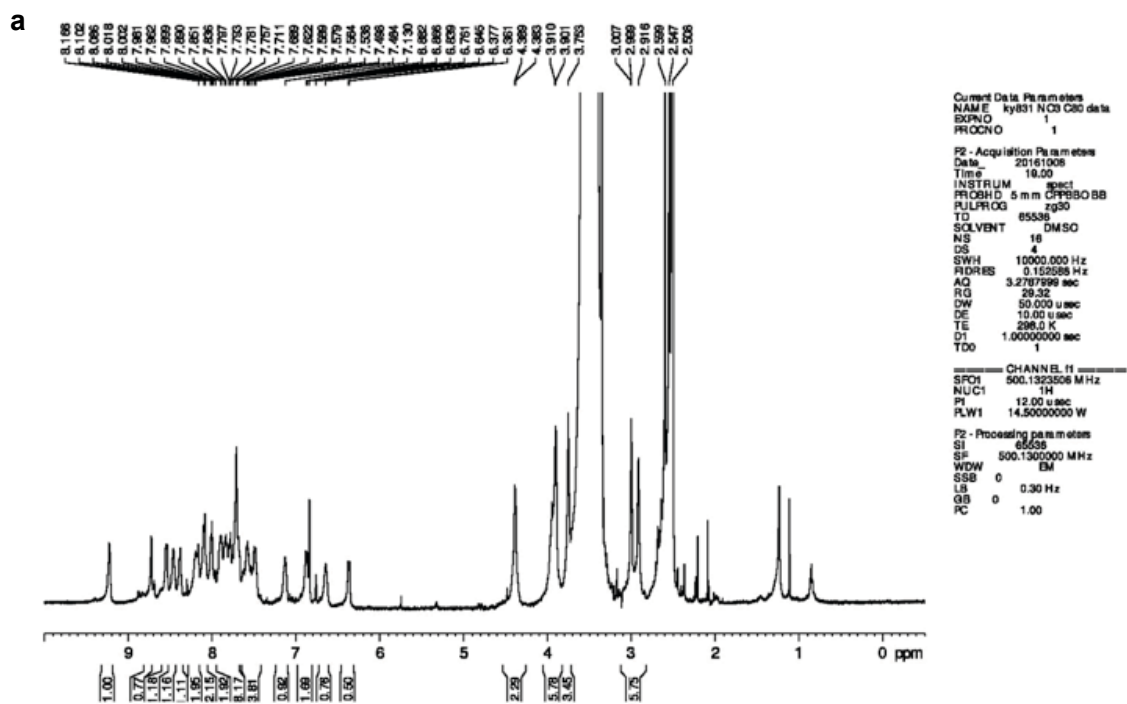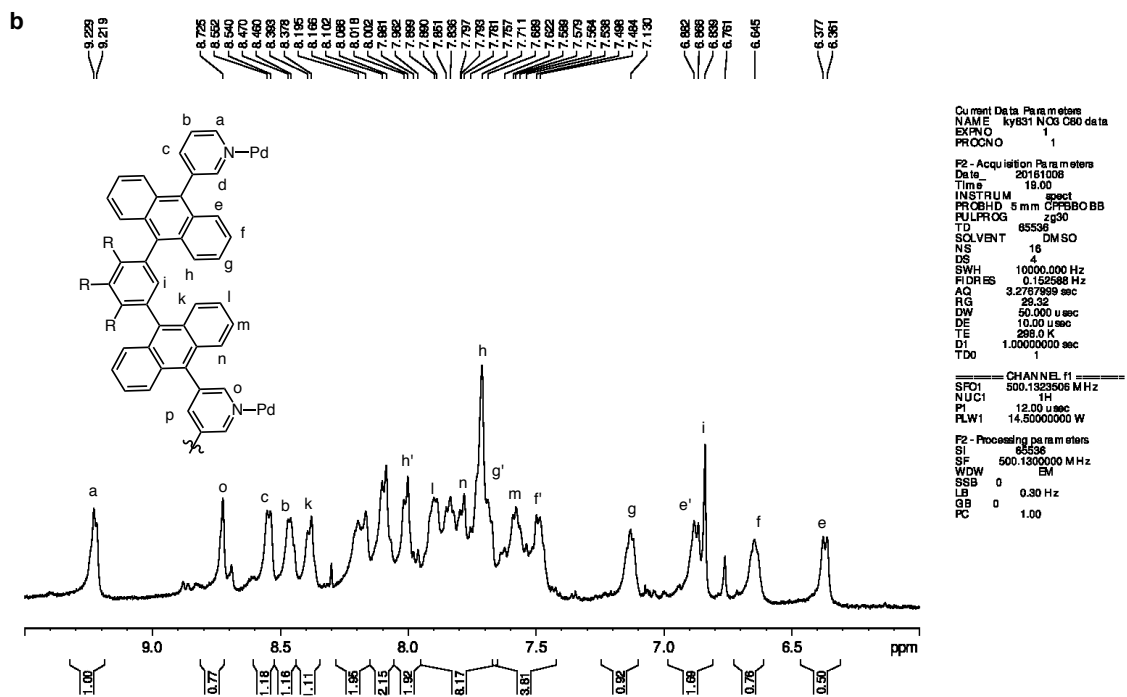

**Supplementary Figure 45** |  $^1\text{H}$  NMR spectra (500 MHz,  $\text{DMSO-}d_6$ , room temperature) of  $(\text{Sc}_3\text{N}@C_{80})_2@3b$ . (a) The aromatic and aliphatic and (b) aromatic regions.

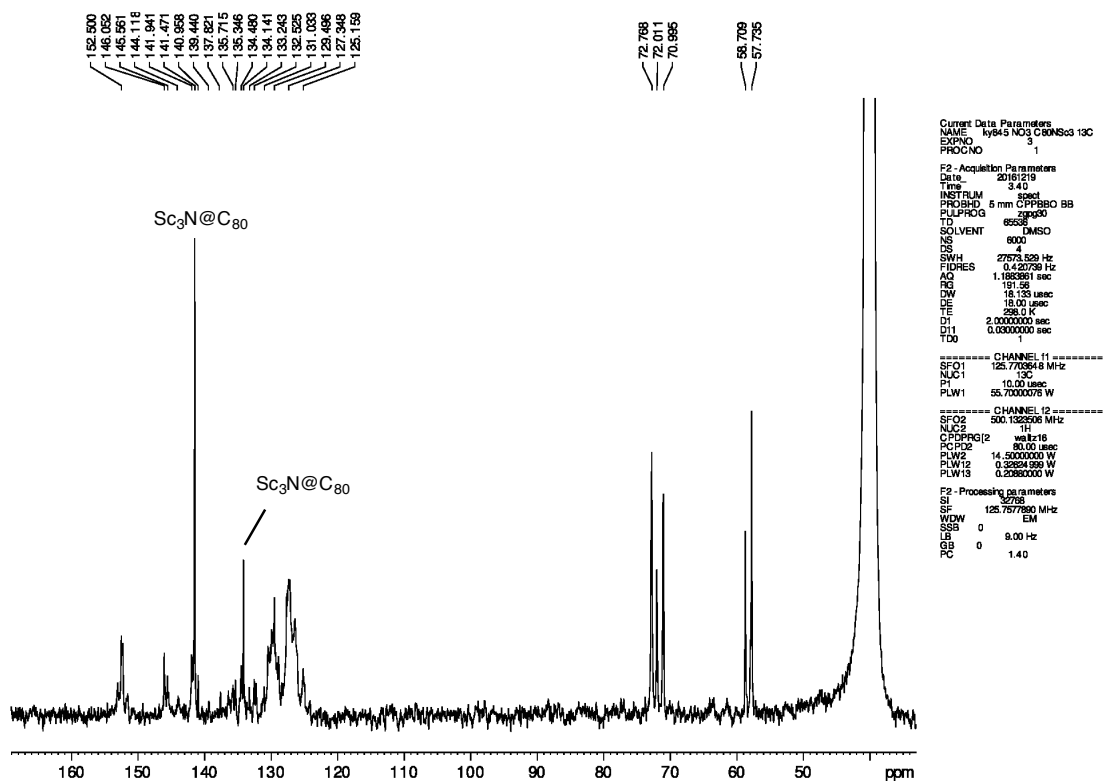

Supplementary Figure 46 |  $^{13}\text{C}$  NMR spectrum (125 MHz,  $\text{DMSO-}d_6$ , room temperature) of  $(\text{Sc}_3\text{N@C}_{80})_2@3\text{b}$ .

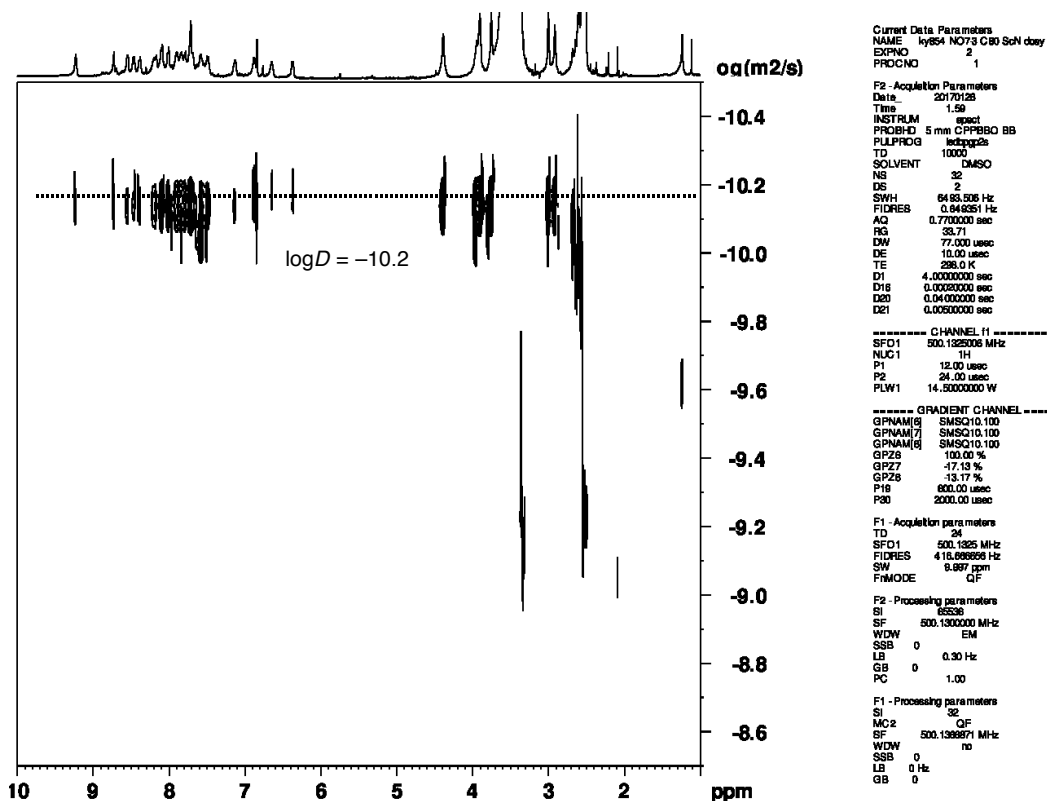

Supplementary Figure 47 | DOSY NMR spectrum (500 MHz,  $\text{DMSO-}d_6$ , 298 K) of  $(\text{Sc}_3\text{N@C}_{80})_2@3\text{b}$ .

## Generic Display Report

### Analysis Info

Analysis Name D:\Data\akita\11\yazaki\ky831\W03 a.d  
Method Pd\_complex2.m  
Sample Name LW30-  
Comment

Acquisition Date 10/6/2016 5:35:51 PM

Operator BDAL@DE  
Instrument micrOTOF

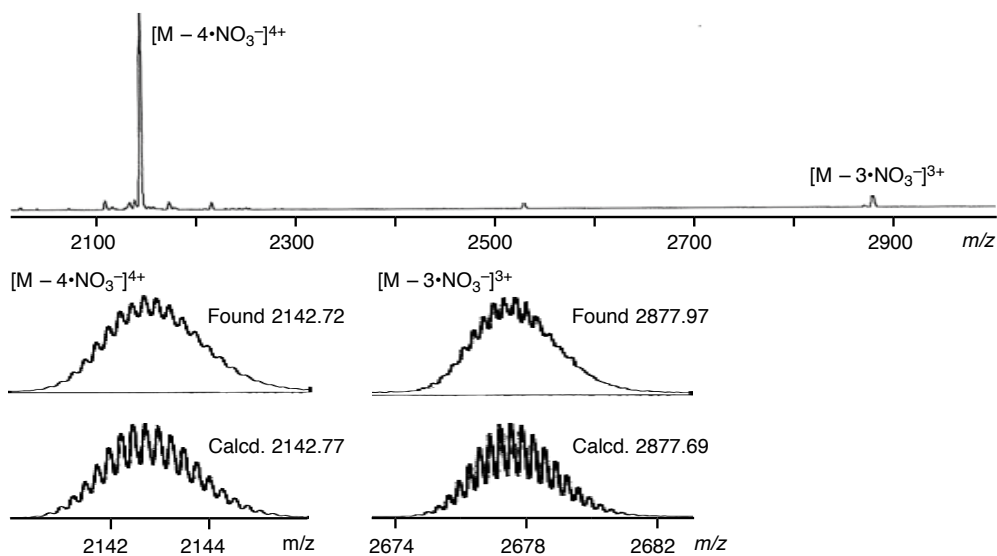

Supplementary Figure 48 | ESI-TOF MS spectrum ( $\text{CH}_3\text{CN}$ ) of  $(\text{Sc}_3\text{N}@C_{80})_2@3b$ .

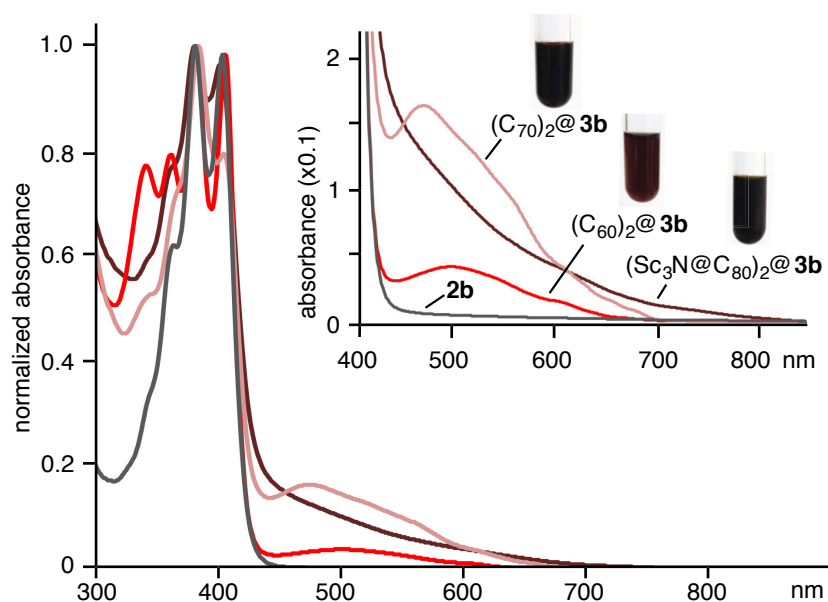

Supplementary Figure 49 | Normalized UV-visible spectra ( $\sim 0.3$  mM, DMSO, room temperature) and photographs of  $(\text{C}_{60})_2@3b$ ,  $(\text{C}_{70})_2@3b$ , and  $(\text{Sc}_3\text{N}@C_{80})_2@3b$ .



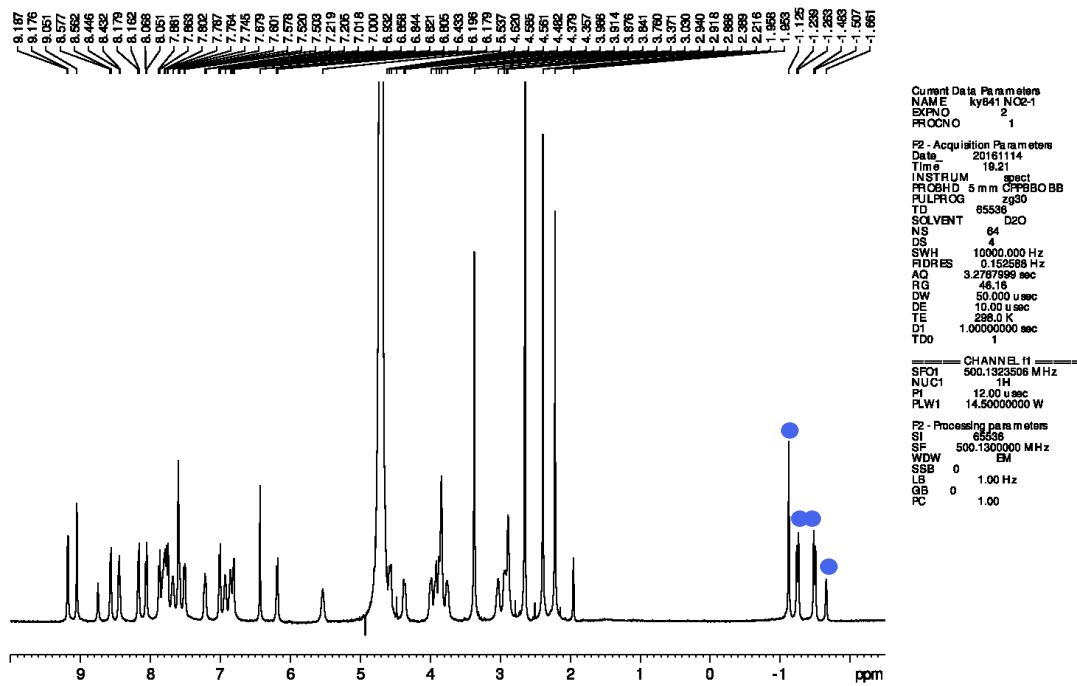

Supplementary Figure 50 |  $^1\text{H}$  NMR spectrum (500 MHz,  $\text{D}_2\text{O}:\text{CD}_3\text{CN} = 100:1$ , room temperature) of  $(4a/4a)@2b$ .

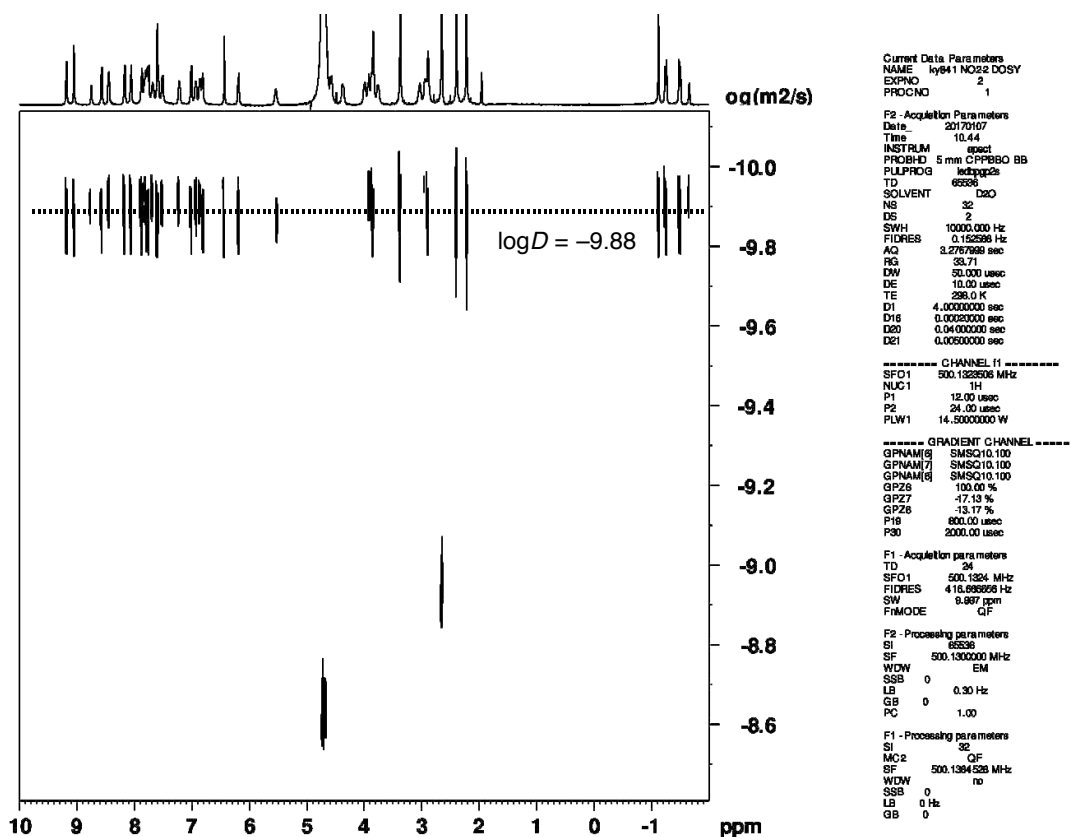

Supplementary Figure 51 | DOSY NMR spectrum (500 MHz,  $\text{D}_2\text{O}:\text{CD}_3\text{CN} = 100:1$ , 298 K) of  $(4a/4a)@2b$ .

## Generic Display Report

### Analysis Info

Analysis Name D:\Data\akita\11yazaki\ky841\NO1-NO2 Csl.d  
 Method Pd\_complex2.m  
 Sample Name LW48-  
 Comment

Acquisition Date 12/1/2016 7:21:55 PM

Operator BDAL@DE  
 Instrument micrOTOF

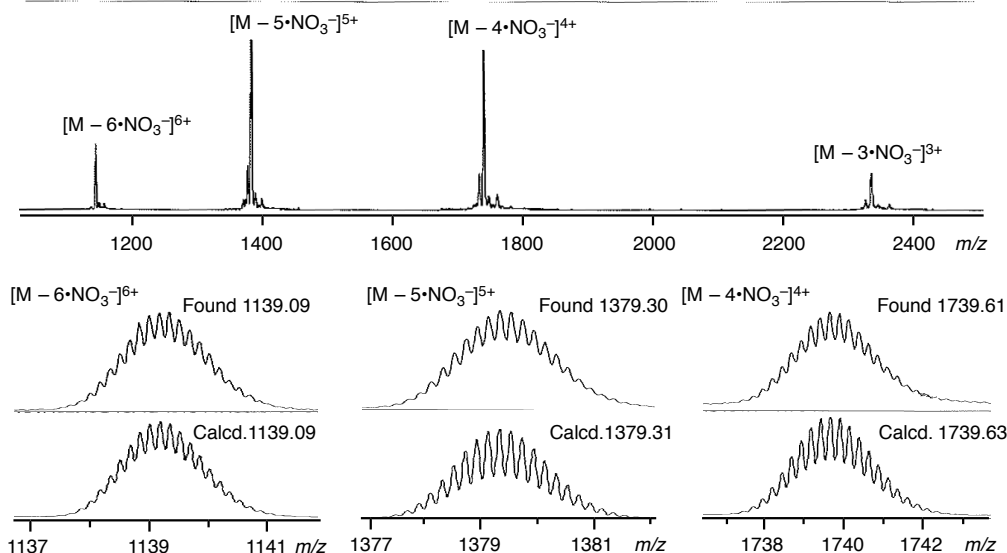

**Supplementary Figure 52** | ESI-TOF MS spectrum ( $H_2O:CH_3CN = 100:1$ ) of **(4a/4a)@2b**.

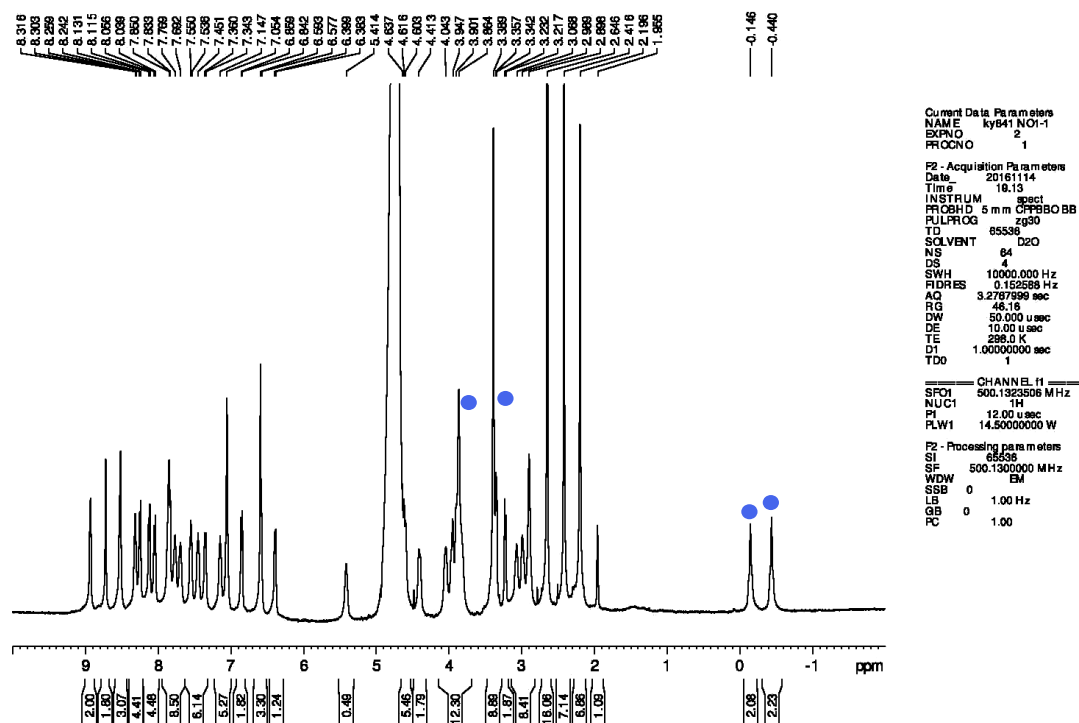

**Supplementary Figure 53** |  $^1H$  NMR spectrum (500 MHz,  $D_2O:CD_3CN = 100:1$ , room temperature) of **(4c/4c)@2b**.

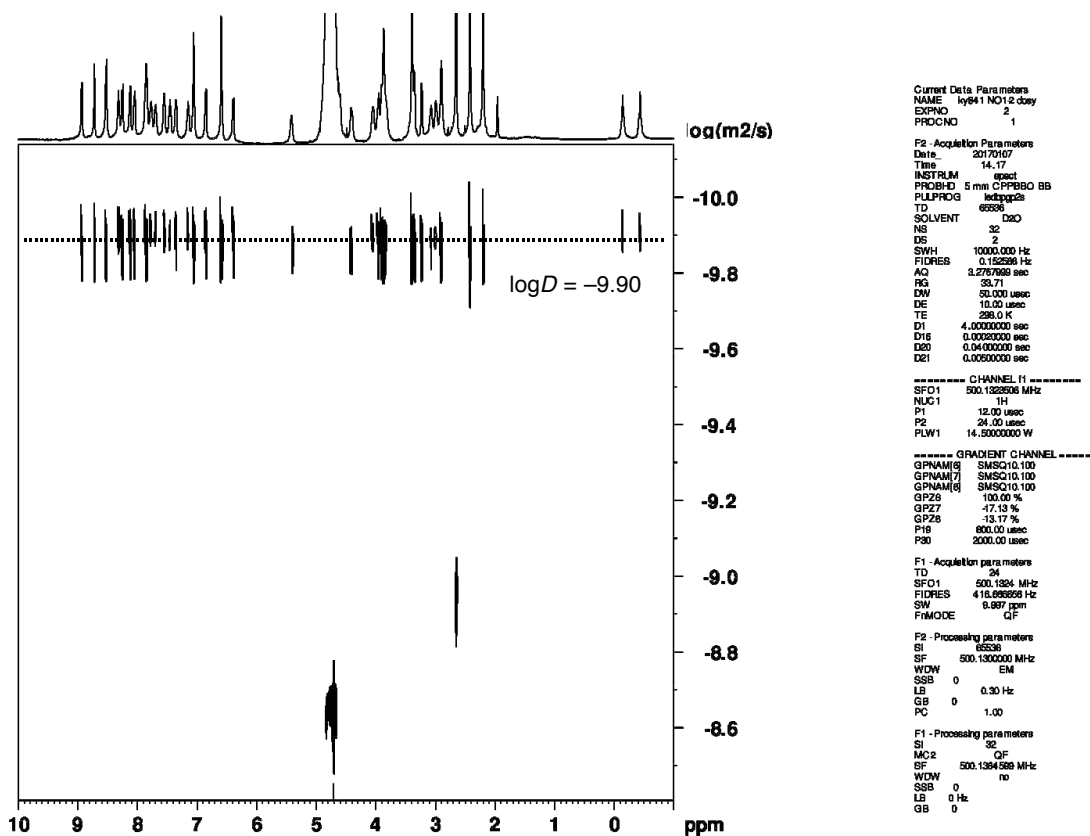

Supplementary Figure 54 | DOSY NMR spectrum (500 MHz, D<sub>2</sub>O:CD<sub>3</sub>CN = 100:1, 298 K) of (4c/4c)@2b.

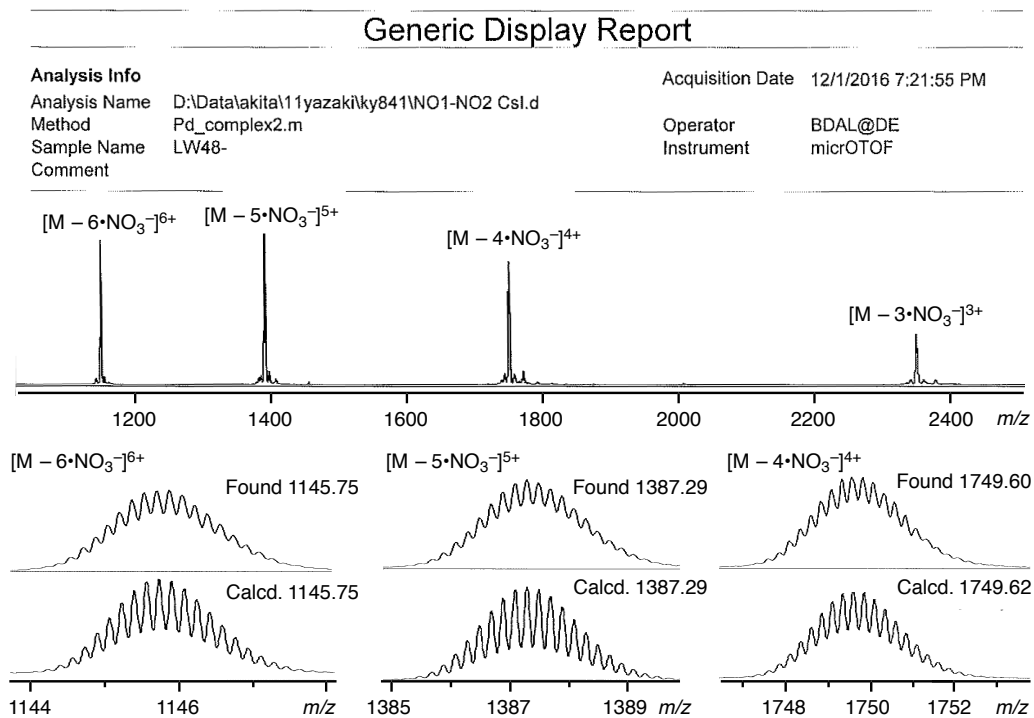

Supplementary Figure 55 | ESI-TOF MS spectrum (H<sub>2</sub>O:CH<sub>3</sub>CN = 100:1) of (4c/4c)@2b.

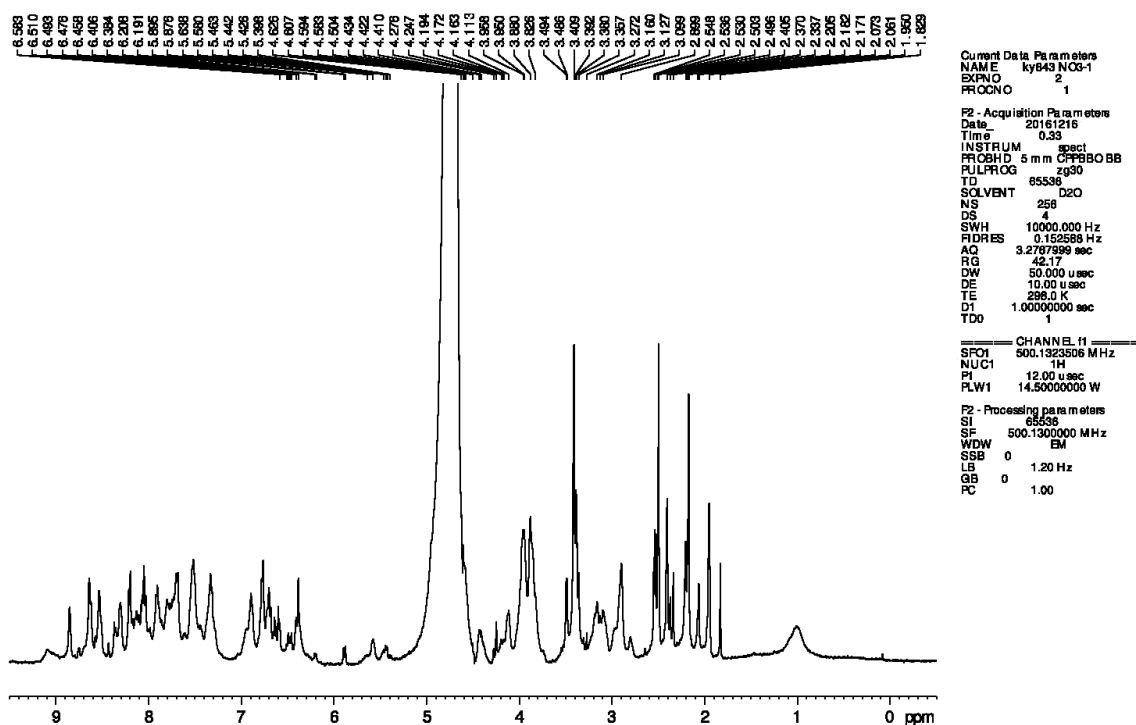

Supplementary Figure 56 |  $^1\text{H}$  NMR spectrum (500 MHz,  $\text{D}_2\text{O}:\text{CD}_3\text{CN} = 100:1$ , room temperature) of  $(4b/(4b)_2)@2b$ .

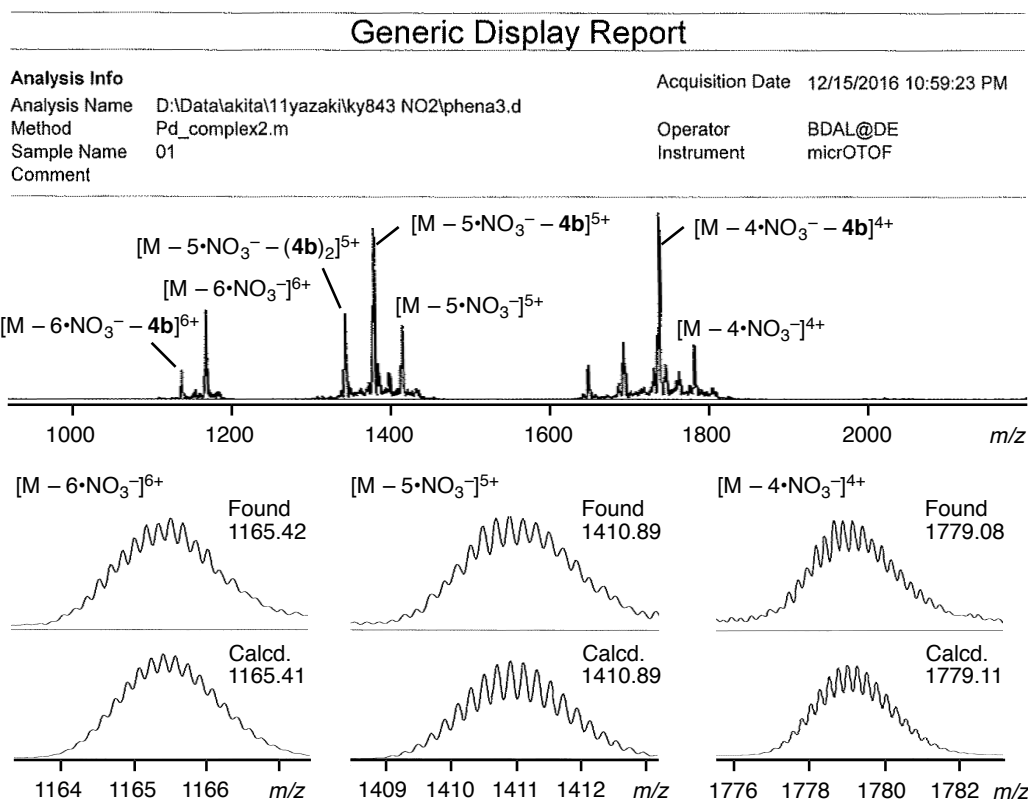

Supplementary Figure 57 | ESI-TOF MS spectrum ( $\text{H}_2\text{O}:\text{CH}_3\text{CN} = 100:1$ ) of  $(4b/(4b)_2)@2b$ .

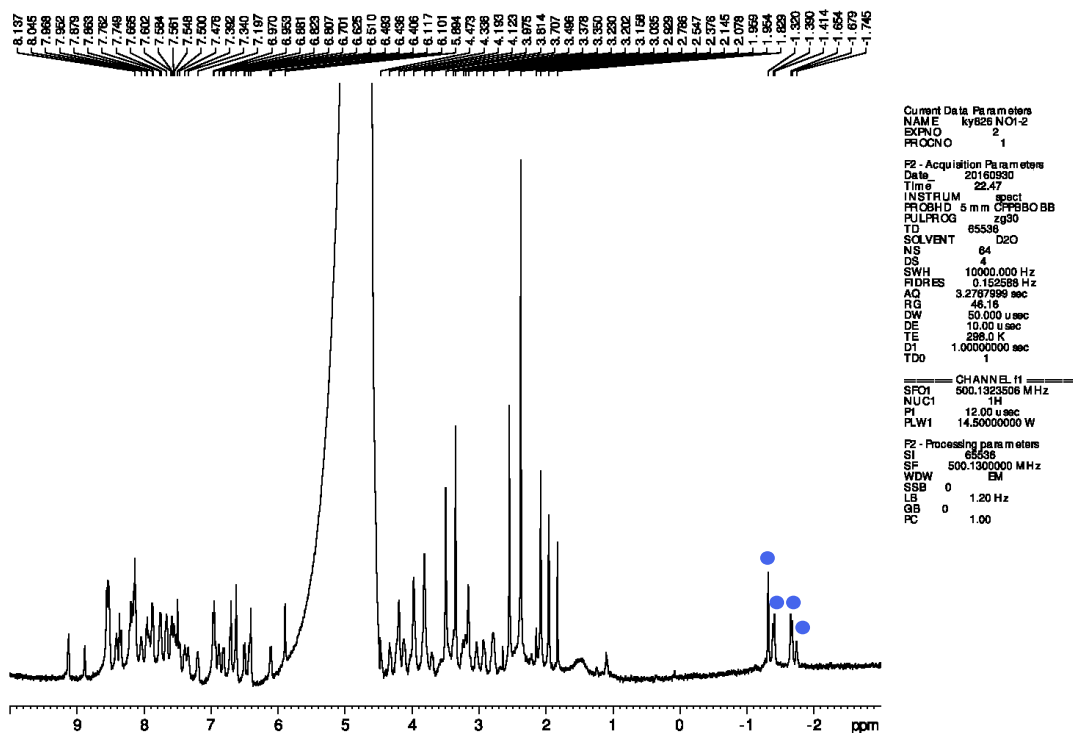

Supplementary Figure 58 |  $^1\text{H}$  NMR spectrum (500 MHz,  $\text{D}_2\text{O}:\text{CD}_3\text{CN} = 100:1$ , room temperature) of  $(4a/(4b)_2)@2b$ .

### Generic Display Report

|                                                            |                                        |
|------------------------------------------------------------|----------------------------------------|
| <b>Analysis Info</b>                                       | Acquisition Date 11/29/2016 4:48:38 PM |
| Analysis Name D:\Data\akita\11yazaki\ky841\NO5 NO4000002.d | Operator BDAL@DE                       |
| Method Pd_complex2.m                                       | Instrument micrOTOF                    |
| Sample Name SM344                                          |                                        |
| Comment                                                    |                                        |

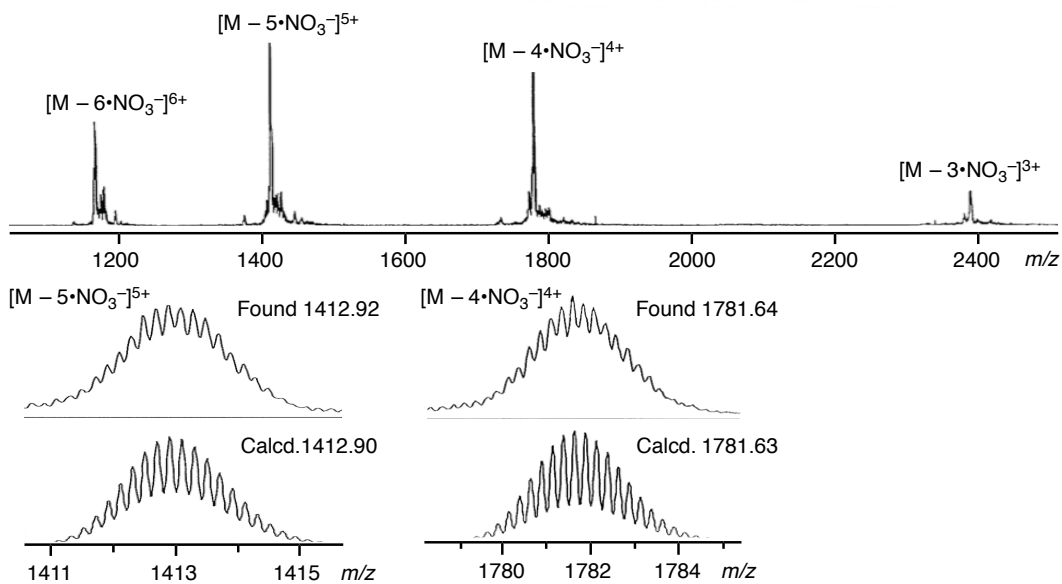

Supplementary Figure 59 | ESI-TOF MS spectrum ( $\text{H}_2\text{O}:\text{CH}_3\text{CN} = 100:1$ ) of  $(4a/(4b)_2)@2b$ .

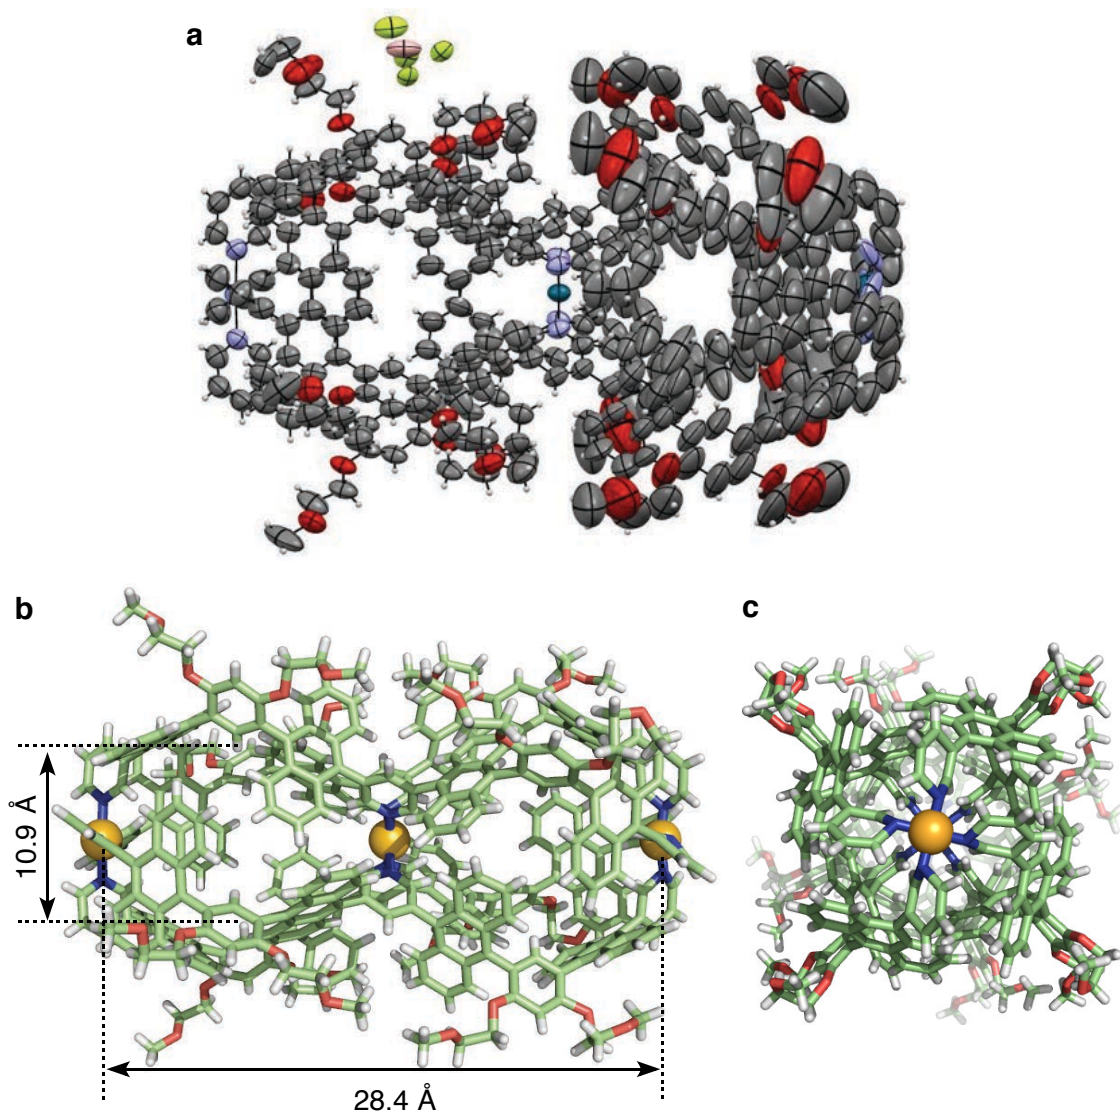

**Supplementary Figure 60** | (a) ORTEP drawing of double capsule **2a'**. Ball-and-stick representation of (b) the side and (c) top views of **2a'**. The counterions are omitted for clarity.



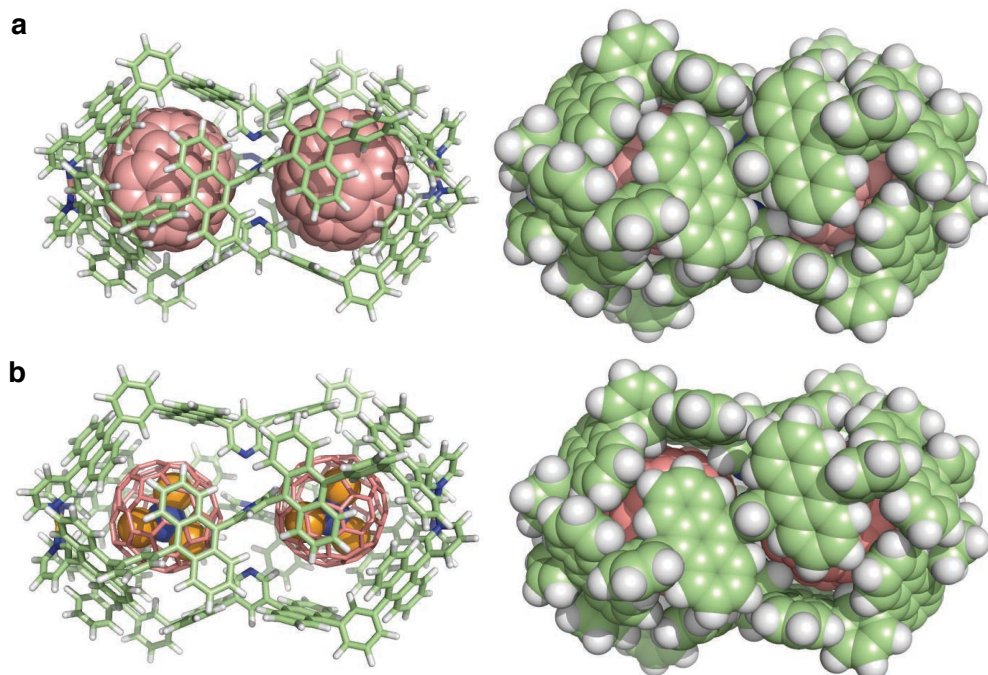

**Supplementary Figure 61** | Optimized structures of (a)  $(C_{70})_2@3b$  ( $R = -H$ ) and (b)  $(Sc_3N@C_{80})_2@3b$  ( $R = -H$ ) by molecular force-field calculation.

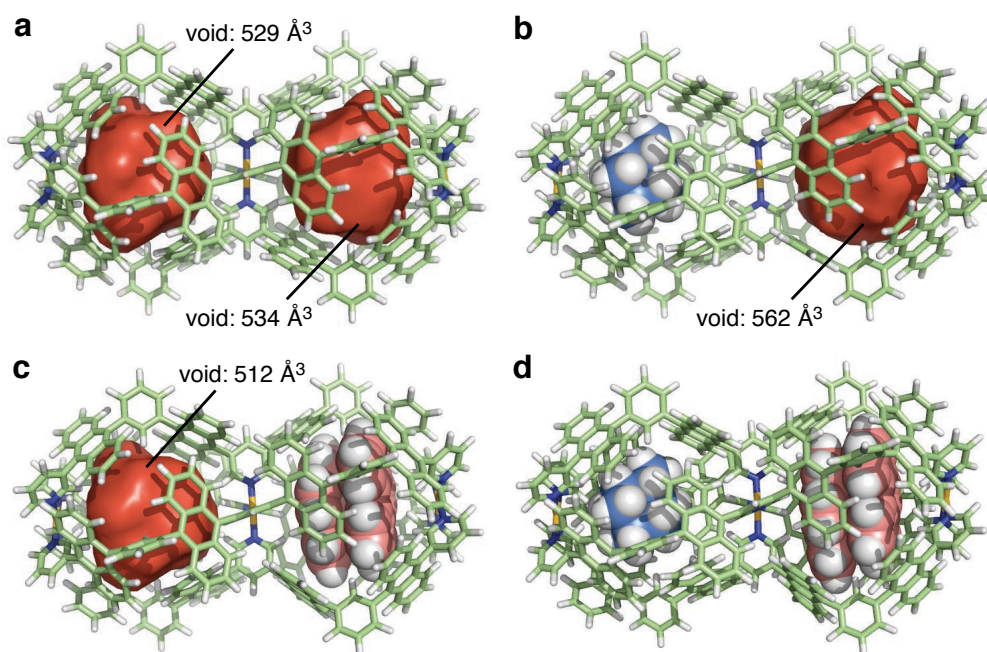

**Supplementary Figure 62** | Optimized structures and calculated voids of (a) **2b** ( $R = -H$ ), (b)  $(4a/void)@2b$  ( $R = -H$ ), (c)  $(void/(4b)_2)@2b$  ( $R = -H$ ), and (d)  $((4a/(4b)_2)@2b$  ( $R = -H$ ) by molecular force-field calculation.

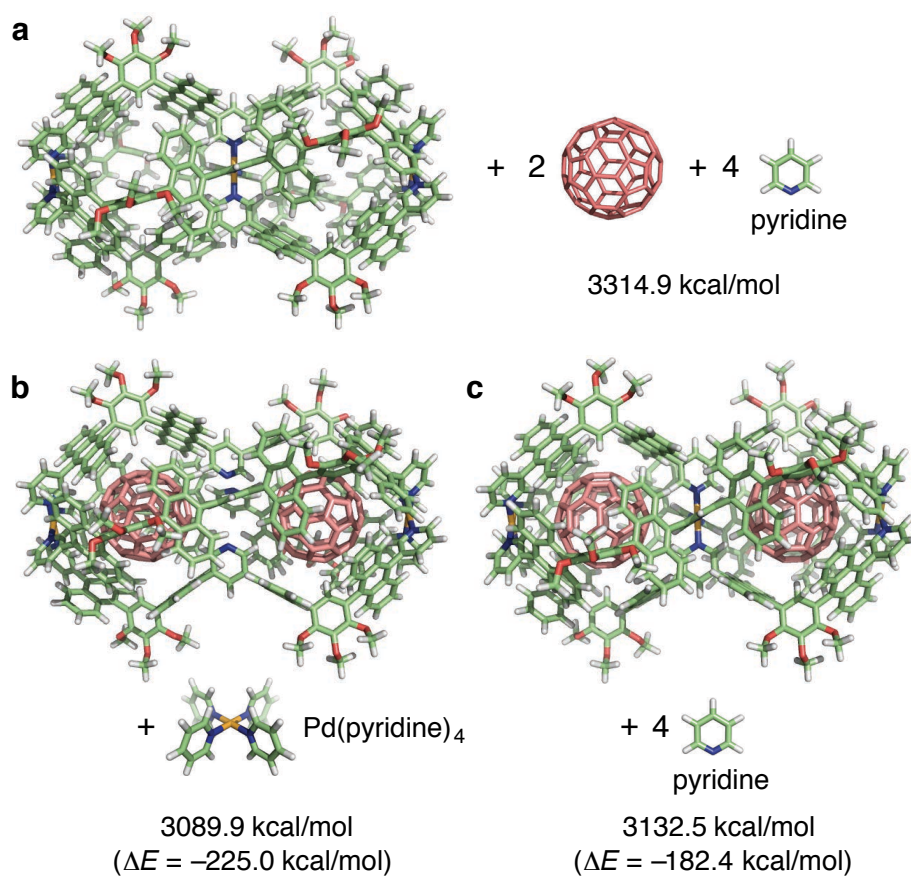

**Supplementary Figure 63** | Calculated total energies of (a) **2b** (R = -OCH<sub>3</sub>), two fullerenes, two DMSO, and four pyridines, and (b) (C<sub>60</sub>)<sub>2</sub>@**3b** (R = -OCH<sub>3</sub>) and Pd(pyridine)<sub>4</sub>, and (c) (C<sub>60</sub>)<sub>2</sub>@**2b** (R = -OCH<sub>3</sub>) and four pyridines by molecular force-field calculation.



## Supplementary Table

### Supplementary Table 1 | Crystal data and structure refinement for **2a'**.

---

|                                   |                                                                                                                          |
|-----------------------------------|--------------------------------------------------------------------------------------------------------------------------|
| Identification code               | KY781                                                                                                                    |
| Empirical formula                 | C380 H300 B1 F4 N12 O32 Pd3                                                                                              |
| Formula weight                    | 5952.61                                                                                                                  |
| Temperature                       | 93 K                                                                                                                     |
| Wavelength                        | 1.54187 Å                                                                                                                |
| Crystal system                    | tetragonal                                                                                                               |
| Space group                       | P4/ncc                                                                                                                   |
| Unit cell dimensions              | $a = 26.5390(8)$ Å $\alpha = 90^\circ$<br>$b = 26.5390(8)$ Å $\beta = 90^\circ$<br>$c = 71.806(7)$ Å $\gamma = 90^\circ$ |
| Volume                            | $50574(5)$ Å <sup>3</sup>                                                                                                |
| Z                                 | 4                                                                                                                        |
| Density (calculated)              | 0.782 Mg/m <sup>3</sup>                                                                                                  |
| Absorption coefficient            | 1.216 mm <sup>-1</sup>                                                                                                   |
| F(000)                            | 12396.0                                                                                                                  |
| Crystal size                      | 0.189 × 0.184 × 0.047 mm <sup>3</sup>                                                                                    |
| Theta range for data collection   | 7.55 to 149.276°.                                                                                                        |
| Index ranges                      | -33 ≤ h ≤ 31, -29 ≤ k ≤ 32, -73 ≤ l ≤ 89                                                                                 |
| Reflections collected             | 152900                                                                                                                   |
| Independent reflections           | 25558 [R(int) = 0.0690]                                                                                                  |
| Completeness to theta = 67.687°   | 98.5 %                                                                                                                   |
| Absorption correction             | multi-scan                                                                                                               |
| Max. and min. transmission        | 0.944 and 0.678                                                                                                          |
| Refinement method                 | Full-matrix least-squares on F <sup>2</sup>                                                                              |
| Data / restraints / parameters    | 25558 / 370 / 1024                                                                                                       |
| Goodness-of-fit on F <sup>2</sup> | 1.204                                                                                                                    |
| Final R indices [I > 2σ(I)]       | R <sub>1</sub> = 0.1060, wR <sub>2</sub> = 0.3412                                                                        |
| R indices (all data)              | R <sub>1</sub> = 0.1548, wR <sub>2</sub> = 0.3855                                                                        |
| Largest diff. peak and hole       | 0.79 and -1.67 e.Å <sup>-3</sup>                                                                                         |

---

The supplementary crystallographic data of **2a'** (CCDC 529139) can be obtained free of charge from the Cambridge Crystallographic Data Centre via [www.ccdc.cam.ac.uk/data\\_request/cif](http://www.ccdc.cam.ac.uk/data_request/cif). Disordered solvent molecules and counterions were removed by SQUEEZE program and the result was attached to the CIF file<sup>1-6</sup>.

## Supplementary Methods

### Synthesis of compound 6a

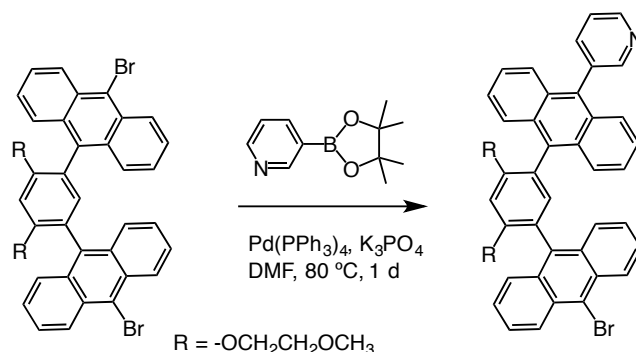

Compound **5a** (2.084 g, 2.829 mmol), 3-pyridineboronic acid pinacol ester (0.614 g, 2.96 mmol),  $K_3PO_4$  (2.673 g, 12.59 mmol), and  $Pd(PPh_3)_4$  (124 mg, 0.108 mmol) were added to a 300 mL glass flask filled with  $N_2$ . Dry DMF (50 mL) was added to the flask and then the mixture was stirred at 80 °C for 1 d. The resultant solution was concentrated under reduced pressure. After addition of water, the crude product was extracted with  $CHCl_3$ . The obtained organic layer was dried over  $MgSO_4$ , filtrated, and concentrated under reduced pressure. The crude product was purified by column chromatography (silica gel, ethyl acetate : hexane :  $CHCl_3$  = 1 : 1 : 1) to afford compound **6a** as a yellow powder (0.819 g, 1.12 mmol, 39%) (see Supplementary Figs 2-6).

$^1H$  NMR (500 MHz,  $CDCl_3$ , room temperature):  $\delta$  8.80 (d,  $J = 5.0$  Hz, 1H), 8.74 (s, 0.5H), 8.65 (s, 0.5H), 8.58 (d,  $J = 9.0$  Hz, 2H), 7.99 (d,  $J = 8.5$  Hz, 2H), 7.96 (d,  $J = 9.0$  Hz, 2H), 7.86 (d,  $J = 7.5$  Hz, 0.5H), 7.77 (d,  $J = 7.0$  Hz, 0.5H), 7.62-7.57 (m, 5H), 7.48-7.42 (m, 4H), 7.35 (dd,  $J = 9.5, 9.5$  Hz, 2H), 7.24 (s, 1H), 7.12 (s, 1H), 4.14 (t,  $J = 5.0$  Hz, 2H), 4.17-4.09 (m, 2H), 3.38 (t,  $J = 5.0$  Hz, 2H), 3.32 (t,  $J = 5.0$  Hz, 2H), 2.94 (s, 6H), 2.91 (s, 6H).  $^{13}C$  NMR (125 MHz,  $CDCl_3$ , room temperature):  $\delta$  158.2 ( $C_q$ ), 151.7 (CH), 148.7 (CH), 139.1 (CH), 136.8 (CH), 135.2 ( $C_q$ ), 134.4 ( $C_q$ ), 134.1 ( $C_q$ ), 132.4 ( $C_q$ ), 131.5 ( $C_q$ ), 130.4 ( $2 \times C_q$ ), 127.9 (CH), 127.4 (CH), 127.2 (CH), 126.8 (CH), 126.2 (CH), 125.5 ( $2 \times CH$ ), 125.1 ( $2 \times C_q$ ), 123.5 (CH), 122.6 ( $C_q$ ), 120.3 ( $C_q$ ), 120.0 ( $C_q$ ), 100.0 (CH), 70.7 ( $CH_2$ ), 69.1 ( $CH_2$ ), 59.0 ( $CH_3$ ). FT-IR (KBr,  $cm^{-1}$ ): 2925, 2879, 2817, 1604, 1506, 1451, 1439, 1376, 1360, 1335, 1303, 1265, 1192, 1162, 1128, 1105, 1058, 1025, 769, 758, 718, 686, 608. HR MS (ESI,  $CH_3OH$ ):  $m/z$  Calcd. for  $C_{45}H_{36}NO_4Br$ : 736.1883, Found 736.1889  $[M + H]^+$ .

## Synthesis of compound 6b

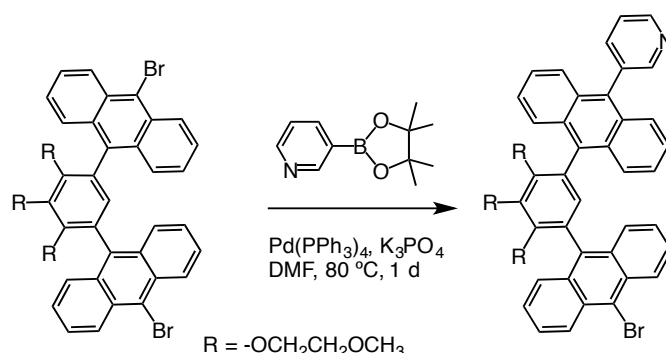

Compound **5b** (2.847 g, 2.945 mmol), 3-pyridineboronic acid pinacol ester (0.5957 g, 2.904 mmol),  $K_3PO_4$  (2.415 g, 11.38 mmol), and  $Pd(PPh_3)_4$  (100.2 mg, 0.8675 mmol) were added to a 300 mL glass flask filled with  $N_2$ . Dry DMF (50 mL) was added to the flask and then the mixture was stirred at 80 °C for 1 d. The resultant solution was concentrated under reduced pressure and then washed by water. The crude product was purified by column chromatography (silica gel, ethyl acetate : hexane = 1 : 1) to give compound **6b** and its debrominated compound. A mixture of the resultant powder and DBH was stirred in  $CH_2Cl_2$  (20 mL) for 1 night. The resultant solution was washed with water to give **6b** as yellow powder (0.7843 g, 0.979 mmol, 33%) (see Supplementary Figs 19-22).

$^1H$  NMR (500 MHz,  $CDCl_3$ , room temperature):  $\delta$  8.83 (d,  $J = 4.5$  Hz, 1H), 8.75 (s, 0.5H), 8.67 (s, 0.5H), 8.62 (d,  $J = 9.0$  Hz, 2H), 7.97 (m, 4H), 7.85 (d,  $J = 8.0$  Hz, 0.5H), 7.77 (d,  $J = 8.0$  Hz, 0.5H), 7.63-7.55 (m, 5.0H), 7.53-7.49 (m, 4.0H), 7.39 (dd,  $J = 7.5$ , 7.5 Hz, 2H), 7.07 (s, 0.5H), 7.06 (s, 0.5H), 4.52-4.51 (m, 2H), 3.98 (t,  $J = 4.5$  Hz, 2H), 3.92 (br, 2H), 3.86 (t,  $J = 4.0$  Hz, 2H), 3.47 (s, 3H), 3.09-3.06 (m, 2H), 3.01 (br, 2H), 2.79-2.78 (m, 6H).  $^{13}C$  NMR (125 MHz,  $CDCl_3$ , room temperature):  $\delta$  152.5 ( $C_q$ ), 152.4 ( $C_q$ ), 152.2 ( $C_q$ ), 151.7 (CH), 151.7 (CH), 148.8 (CH), 145.8 ( $C_q$ ), 145.7 ( $C_q$ ), 139.1 (CH), 139.0 (CH), 135.0 ( $C_q$ ), 134.1 ( $C_q$ ), 134.0 ( $C_q$ ), 133.8 ( $C_q$ ), 133.7 ( $C_q$ ), 132.8 ( $C_q$ ), 131.3 ( $C_q$ ), 130.5 (CH), 130.4 (CH), 130.3 ( $C_q$ ), 130.2 ( $C_q$ ), 128.0 (CH), 127.6 ( $C_q$ ), 127.3 (CH), 127.2 (CH), 127.0 (CH), 126.9 (CH), 126.3 (CH), 125.9 (CH), 125.6 (CH), 125.5 (CH), 123.5 (CH), 123.4 (CH), 123.0 ( $C_q$ ), 72.9 ( $CH_2$ ), 72.8 ( $CH_2$ ), 72.1 ( $CH_2$ ), 71.4 ( $CH_2$ ), 71.3 ( $CH_2$ ), 59.0 ( $CH_2$ ), 58.3 ( $CH_3$ ). FT-IR (KBr,  $cm^{-1}$ ): 2979, 2925, 2881, 2818, 1464, 1438, 1416, 1389, 1348, 1256, 1130, 1106, 1070, 1026, 926, 909, 759. MALDI-TOF MS (dithranol):  $m/z$  Calcd. for  $C_{48}H_{42}NO_6$ : 810.23, Found 810.42 [M + H]<sup>+</sup>. HR MS (ESI):  $m/z$  Calcd. for  $C_{48}H_{42}NO_6$ : 810.2251, Found 810.2219 [M + H]<sup>+</sup>.

## Synthesis of W-shaped ligand **1b**

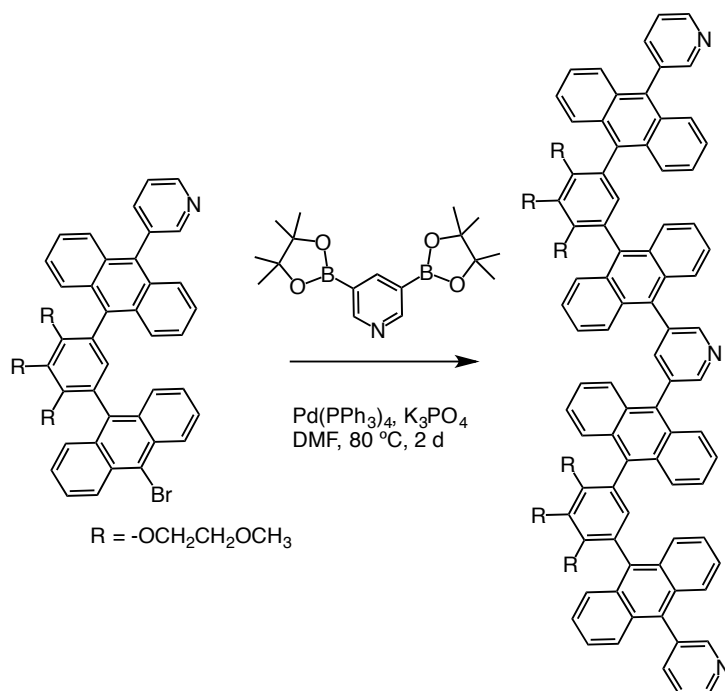

Compound **6b** (1.3568 g, 1.6775 mmol), 3,5-pyridinediboronic acid bis(pinacol) ester (194.6 mg, 0.58 mmol), K<sub>3</sub>PO<sub>4</sub> (1.04 g, 4.9 mmol), and Pd(PPh<sub>3</sub>)<sub>4</sub> (90.5 mg, 78.0 μmol) were added to a 300 mL glass flask filled with N<sub>2</sub>. Dry DMF (100 mL) was added to the flask and then the mixture was stirred at 80 °C for 2 d. After addition of water (200 mL), the precipitation was collected by the filtration. The crude product was purified by gel permeation chromatography to afford ligand **1b** as a yellow powder (345.1 mg, 0.2248 mmol, 39%) (see Supplementary Figs 23-26).

<sup>1</sup>H NMR (500 MHz, CDCl<sub>3</sub>, room temperature): δ 8.96-8.60 (m, 6H), 8.06-7.34 (m, 37H), 7.16-7.08 (m, 2H), 4.56-4.54 (m, 4H), 4.01-3.87 (m, 12H), 3.50-3.44 (m, 6H), 3.14-3.07 (m, 8H), 2.86-2.56 (m, 12H). <sup>13</sup>C NMR (100 MHz, CDCl<sub>3</sub>, room temperature): δ 152.4 (CH), 151.8 (C<sub>q</sub>), 151.1 (CH), 148.9 (CH), 145.7 (C<sub>q</sub>), 141.9 (CH), 138.9 (CH), 134.9 (C<sub>q</sub>), 134.7 (C<sub>q</sub>), 134.4 (C<sub>q</sub>), 134.1 (C<sub>q</sub>), 132.8 (C<sub>q</sub>), 132.4 (C<sub>q</sub>), 130.6 (CH), 130.20 (C<sub>q</sub>), 127.6 (CH), 127.2 (CH), 127.1 (CH), 126.3 (CH), 125.9 (CH), 125.5 (CH), 123.4 (CH, C<sub>q</sub>), 72.9 (CH<sub>2</sub>), 72.7 (CH<sub>2</sub>), 72.1 (CH<sub>2</sub>), 71.4 (CH<sub>2</sub>), 59.0 (CH<sub>3</sub>), 58.2 (CH<sub>3</sub>). FT-IR (KBr, cm<sup>-1</sup>): 2926, 2877, 2814, 1440, 1415, 1394, 1375, 1356, 1245, 1196, 1129, 1104, 1068, 1025, 927, 767, 718, 650. HR MS (ESI, CH<sub>2</sub>Cl<sub>2</sub>:CH<sub>3</sub>OH): *m/z* Calcd. 1557.6215, Found 1557.6214 [M + Na]<sup>+</sup>.

## Formation of double capsule **2b**

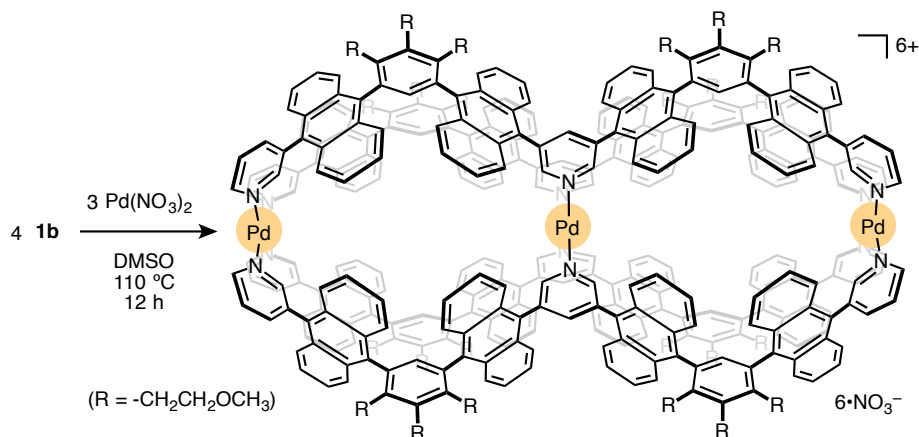

W-shaped ligand **1b** (91.8 mg, 59.8  $\mu\text{mol}$ ), a DMSO-*d*<sub>6</sub> solution (50 mM) of Pd(NO<sub>3</sub>)<sub>2</sub> (0.93 mL, 46.4  $\mu\text{mol}$ ), which prepared *in situ* from PdCl<sub>2</sub>(DMSO)<sub>2</sub> and AgNO<sub>3</sub>, and DMSO-*d*<sub>6</sub> (4 mL) were added to a glass test tube and then the mixture was stirred at 110 °C for 12 h. The quantitative formation of double capsule **2b** was confirmed by NMR and MS analyses (see Supplementary Figs 27-33).

<sup>1</sup>H NMR (500 MHz, D<sub>2</sub>O:CD<sub>3</sub>CN = 5:1, room temperature):  $\delta$  9.32 (d, *J* = 5.5 Hz, 2H), 9.25 (s, 2H), 8.81 (s, 2H), 8.73 (d, *J* = 5.5 Hz, 2H), 8.56 (dd, *J* = 5.5, 5.5 Hz, 2H), 8.31 (d, *J* = 6.8 Hz, 2H), 8.26 (d, *J* = 8.5 Hz, 2H), 8.07 (d, *J* = 9.0 Hz, 2H), 8.04-7.89 (m, 10H), 7.70 (dd, *J* = 7.5, 7.0 Hz, 2H), 7.66 (d, *J* = 8.5 Hz, 2H), 7.45 (dd, *J* = 8.0, 7.0 Hz, 2H), 7.19 (dd, *J* = 7.0, 7.0 Hz, 2H), 7.09-7.00 (m, 6H), 6.69 (d, *J* = 8.0 Hz, 2H), 6.64 (s, 2H), 5.92 (dd, *J* = 8.5, 7.5 Hz, 2H), 4.72 (br, 2H), 4.57-4.54 (m, 2H), 4.21-4.19 (m, 2H), 4.13-4.01 (m, 10H), 3.55 (s, 6H), 3.28-3.25 (m, 2H), 3.20-3.17 (m, 2H), 3.06-3.04 (m, 4H), 2.70 (s, 6H), 2.57 (s, 6H). <sup>13</sup>C NMR (120 MHz, D<sub>2</sub>O:CD<sub>3</sub>CN = 5:1, room temperature):  $\delta$  151.6 (CH), 151.3 (CH, C<sub>q</sub>), 150.4 (CH), 147.3 (CH), 144.9 (C<sub>q</sub>), 144.0 (CH), 139.5 (C<sub>q</sub>), 137.1 (C<sub>q</sub>), 135.6 (C<sub>q</sub>), 134.4 (C<sub>q</sub>), 129.2 (CH), 128.9 (C<sub>q</sub>), 128.8 (C<sub>q</sub>), 128.6 (C<sub>q</sub>), 128.4 (C<sub>q</sub>), 128.0 (C<sub>q</sub>), 127.7 (C<sub>q</sub>), 127.4 (CH), 127.2 (CH), 126.5 (CH), 126.3 (CH), 124.9 (CH), 124.7 (CH), 124.0 (CH), 123.4 (CH), 122.6 (CH), 122.2 (CH), 71.8 (CH<sub>2</sub>), 70.9 (CH<sub>2</sub>), 69.9 (CH<sub>2</sub>), 57.4 (CH<sub>3</sub>), 56.4 (CH<sub>3</sub>). DOSY NMR (500 MHz, DMSO-*d*<sub>6</sub>, 298 K): *D* = 6.31  $\times 10^{-11}$  m<sup>2</sup> s<sup>-1</sup>. FT-IR (KBr, cm<sup>-1</sup>): 3060, 2931, 2884, 2816, 1442, 1417, 1378, 1228, 1195, 1105, 1065, 1030, 944, 925, 886, 848, 829, 772, 707, 671, 643, 616. ESI-TOF MS (CH<sub>3</sub>CN): *m/z* 1304.0 [**2b** - 5•NO<sub>3</sub><sup>-</sup>]<sup>5+</sup>, 1645.5 [**2b** - 4•NO<sub>3</sub><sup>-</sup>]<sup>4+</sup>, 2214.7 [**2b** - 3•NO<sub>3</sub><sup>-</sup>]<sup>3+</sup>.

### Formation of (C<sub>60</sub>)<sub>2</sub>@3a, (C<sub>70</sub>)<sub>2</sub>@3b, and (Sc<sub>3</sub>N@C<sub>80</sub>)<sub>2</sub>@3b

(C<sub>60</sub>)<sub>2</sub>@3a. <sup>1</sup>H NMR (500 MHz, DMSO, room temperature): δ 9.18 (d, *J* = 5.0 Hz, 2H), 8.67 (br, 4H), 8.51 (dd, *J* = 9.0, 5.0 Hz, 2H), 8.42 (d, *J* = 9.0 Hz, 2H), 8.30 (d, *J* = 8.0 Hz, 2H), 8.05 (br, 2H), 7.98 (d, *J* = 8.5 Hz, 2H), 7.91-7.86 (m, 4H), 7.78 (s, 1H), 7.71-7.69 (m, 4H), 7.61-7.50 (m, 10H), 7.20 (s, 2H), 7.02 (dd, *J* = 7.5, 6.0 Hz, 2H), 6.90 (d, *J* = 8.5 Hz, 2H), 6.84 (s, 2H), 6.57 (br, 2H), 6.29 (d, *J* = 8.0 Hz, 2H), 4.26 (br, 4H), 4.12 (br, 4H), 3.35 (br, 4H), 3.20 (br, 4H), 2.95 (s, 6H), 2.69 (s, 6H). ESI-TOF MS (CH<sub>3</sub>CN) of (C<sub>60</sub>)<sub>2</sub>@3a: *m/z* 1800.0 [(C<sub>60</sub>)<sub>2</sub>@3a - 4•NO<sub>3</sub><sup>-</sup>]<sup>4+</sup>, 2420.7 [(C<sub>60</sub>)<sub>2</sub>@3a - 3•NO<sub>3</sub><sup>-</sup>]<sup>3+</sup>.

(C<sub>70</sub>)<sub>2</sub>@3b. <sup>1</sup>H NMR (500 MHz, DMSO, room temperature): δ 9.38 (d, *J* = 5.0 Hz, 2H), 8.97 (s, 2H), 8.71 (d, *J* = 7.5 Hz, 2H), 8.60 (dd, *J* = 7.5, 5.0 Hz, 2H), 8.43-8.41 (m, 2H), 8.20 (s, 2H), 8.12 (s, 2H), 7.99 (d, *J* = 8.0 Hz, 2H), 7.90 (d, *J* = 8.5 Hz, 2H), 7.84 (br, 2H), 7.77 (br, 2H), 7.73 (dd, *J* = 8.5, 6.5 Hz, 2H), 7.62 (br, 2H), 7.51 (br, 6H), 7.07 (d, *J* = 8.0 Hz, 2H), 6.89 (dd, *J* = 8.0, 7.0 Hz, 2H), 6.57 (br, 4H), 6.46 (d, *J* = 8.0 Hz, 2H), 4.36-4.28 (m, 4H), 3.96-3.86 (m, 4H), 3.82-3.74 (m, 4H), 3.71 (t, *J* = 4.0 Hz, 4H), 3.32 (s, 6H), 3.01 (t, *J* = 5.0 Hz, 4H), 2.85 (t, *J* = 4.5 Hz, 4H), 2.62 (s, 6H), 2.55 (s, 6H). ESI-TOF MS (CH<sub>3</sub>CN) of (C<sub>70</sub>)<sub>2</sub>@3b: *m/z* 2008.3 [(C<sub>70</sub>)<sub>2</sub>@3b - 4•NO<sub>3</sub><sup>-</sup>]<sup>4+</sup>, 2698.4 [(C<sub>70</sub>)<sub>2</sub>@3b - 3•NO<sub>3</sub><sup>-</sup>]<sup>3+</sup>.

(Sc<sub>3</sub>N@C<sub>80</sub>)<sub>2</sub>@3b. <sup>1</sup>H NMR (500 MHz, DMSO, room temperature): δ 9.22 (d, *J* = 5.0 Hz, 2H), 8.73 (s, 2H), 8.55 (d, *J* = 6.0 Hz, 2H), 8.46 (br, 2H), 8.39 (d, *J* = 6.0 Hz, 2H), 8.20 (br, 2H), 8.16 (br, 2H), 8.10 (d, *J* = 7.0 Hz, 2H), 8.01 (d, *J* = 8.0 Hz, 2H), 7.89 (br, 3H), 7.84 (br, 2H), 7.79 (br, 2H), 7.76 (br, 4H), 7.58 (br, 4H), 7.49 (d, *J* = 6.0 Hz, 2H), 7.13 (br, 2H), 6.88 (d, *J* = 7.0 Hz, 2H), 6.76 (s, 2H), 6.65 (br, 2H), 6.37 (d, *J* = 8.0 Hz, 2H), 4.39 (br, 4H), 3.95-3.90 (m, 8H), 3.75 (br, 4H), 3.35 (s, 6H), 3.00 (br, 4H), 2.92 (br, 4H), 2.60 (s, 6H), 2.55 (s, 6H). ESI-TOF MS (CH<sub>3</sub>CN) of (Sc<sub>3</sub>N@C<sub>80</sub>)<sub>2</sub>@3b: *m/z* 2142.8 [(Sc<sub>3</sub>N@C<sub>80</sub>)<sub>2</sub>@3b - 4•NO<sub>3</sub><sup>-</sup>]<sup>4+</sup>, 2877.7 [(Sc<sub>3</sub>N@C<sub>80</sub>)<sub>2</sub>@3b - 3•NO<sub>3</sub><sup>-</sup>]<sup>3+</sup>.

## Encapsulation of diamantane (4a) by 2b

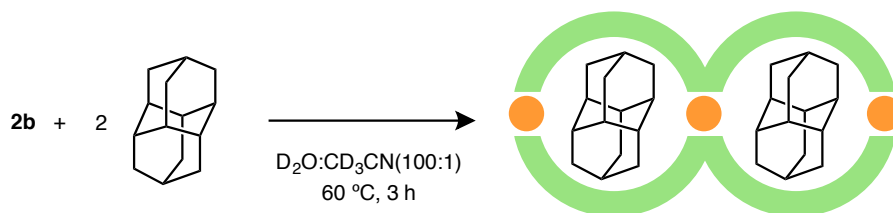

Diamantane (**4a**; 0.8 mg, 4.0  $\mu\text{mol}$ ) was added to a 100:1  $D_2O:CD_3CN$  solution (0.6 mL) of double capsule **2b** (1.5 mg, 0.22  $\mu\text{mol}$ ) and the mixture was stirred at  $60\text{ }^\circ\text{C}$  for 3 h. The quantitative formation of a (**4a/4a**)@**2b** complex was confirmed by NMR and ESI-TOF MS analyses (see Supplementary Figs 50-52). Similarly, two molecules of *p*-cyclophane (**4c**) were quantitatively encapsulated within **2b** to give a (**4c/4c**)@**2b** complex (see Supplementary Figs 53-55).

**(4a/4a)**@**2b**. DOSY NMR (500 MHz,  $D_2O:CD_3CN = 100:1$ , 298 K):  $D = 1.32 \times 10^{-10} \text{ m}^2 \text{ s}^{-1}$ . ESI-TOF MS ( $H_2O:CH_3CN = 100:1$ ):  $m/z$  1139.1 [(**4a/4a**)@**2b** - 6• $\text{NO}_3^-$ ] $^{6+}$ , 1379.3 [(**4a/4a**)@**2b** - 5• $\text{NO}_3^-$ ] $^{5+}$ , 1739.6 [(**4a/4a**)@**2b** - 4• $\text{NO}_3^-$ ] $^{4+}$ , 2340.1 [(**4a/4a**)@**2b** - 3• $\text{NO}_3^-$ ] $^{3+}$ .

**(4c/4c)**@**2b**. DOSY NMR (500 MHz,  $D_2O:CD_3CN = 100:1$ , 298 K):  $D = 1.26 \times 10^{-10} \text{ m}^2 \text{ s}^{-1}$ . ESI-TOF MS ( $H_2O:CH_3CN = 100:1$ ):  $m/z$  1145.8 [(**4c/4c**)@**2b** - 6• $\text{NO}_3^-$ ] $^{6+}$ , 1387.3 [(**4c/4c**)@**2b** - 5• $\text{NO}_3^-$ ] $^{5+}$ , 1749.6 [(**4c/4c**)@**2b** - 4• $\text{NO}_3^-$ ] $^{4+}$ , 2353.5 [(**4c/4c**)@**2b** - 3• $\text{NO}_3^-$ ] $^{3+}$ .

## Encapsulation of phenanthrene (4b) by 2b

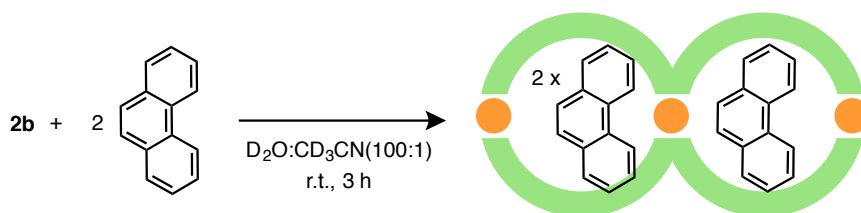

Phenanthrene (**4b**; 0.8 mg, 4.4  $\mu\text{mol}$ ) was added to a 100:1  $D_2O:CD_3CN$  solution (0.6 mL) of double capsule **2b** (1.5 mg, 0.22  $\mu\text{mol}$ ) and the mixture was stirred at room temperature for 3 h. The formation of a (**4b/(4b)**)<sub>2</sub>@**2b** complex was confirmed by NMR and ESI-TOF MS analyses (see Supplementary Figs 56-57).

ESI-TOF MS ( $H_2O:CH_3CN = 100:1$ ):  $m/z$  1165.4 [(**4b/(4b)**)<sub>2</sub>@**2b** - 6• $\text{NO}_3^-$ ] $^{6+}$ , 1410.9 [(**4b/(4b)**)<sub>2</sub>@**2b** - 5• $\text{NO}_3^-$ ] $^{5+}$ , 1779.1 [(**4b/(4b)**)<sub>2</sub>@**2b** - 4• $\text{NO}_3^-$ ] $^{4+}$ .

## Supplementary References

1. Rigaku CrystalStructure, Version 4.2 (2015).
2. Rigaku REQAB (1998).
3. Sheldrick, G. M. A short history of *SHELX*. *Acta Cryst. A* **64**, 112-122 (2008).
4. Sheldrick, G. M. SHELXT: Integrating space group determination and structure solution. *Acta Cryst. A* **70**, C1437 (2014).
5. Vandersluis, P. & Spek, L. A. BYPASS: an effective method for the refinement of crystal structures containing disordered solvent regions. *Acta Cryst. A* **46**, 194–201 (1990).
6. Spek, A. L. Structure validation in chemical crystallography. *Acta Cryst. D* **65**, 148–155 (2009).
